# Supplementary material
Source: publisher figshare collection journal article supplement (https://gsajournals.figshare.com/ndownloader/files/25271225)
Supplement: Supplementary file 1 [file 25271225]

,ORF Name,baseMean,log2FoldChange,lfcSE,stat,pvalue,padj,SGD ID,Gene Name,Gene Length,Verified ORF?,Chromosome,Start,End,Strand,Description
1,YAL028W,199.2779241,1.87427309,0.151046538,12.36444699,4.07E-35,6.24E-34,S000000026,FRT2,1587,Verified,chrI,92900,94486,1,"Tail-anchored ER membrane protein of unknown function; interacts with homolog Frt1p; promotes growth in conditions of high Na+, alkaline pH, or cell wall stress, possibly via a role in posttranslational translocation; potential Cdc28p substrate; FRT2 has a paralog, FRT1, that arose from the whole genome duplication"
2,YAL048C,374.7082433,1.009831741,0.126859368,7.956392686,1.77E-15,1.07E-14,S000000046,GEM1,1989,Verified,chrI,52801,54789,-1,"Outer mitochondrial membrane GTPase, subunit of the ERMES complex; potential regulatory subunit of the ERMES complex that links the ER to mitochondria and may promote inter-organellar calcium and phospholipid exchange as well as coordinating mitochondrial DNA replication and growth; cells lacking Gem1p contain collapsed, globular, or grape-like mitochondria; ortholog of metazoan Miro GTPases"
3,YAL061W,670.5931495,2.054071991,0.131939229,15.5518335,1.55E-54,4.56E-53,S000000057,BDH2,1254,Uncharacterized,chrI,33448,34701,1,Putative medium-chain alcohol dehydrogenase with similarity to BDH1; transcription induced by constitutively active PDR1 and PDR3
4,YAL062W,440.3638831,1.331689193,0.158409789,8.404198117,4.31E-17,2.85E-16,S000000058,GDH3,1374,Verified,chrI,31567,32940,1,"NADP(+)-dependent glutamate dehydrogenase; synthesizes glutamate from ammonia and alpha-ketoglutarate; rate of alpha-ketoglutarate utilization differs from Gdh1p; expression regulated by nitrogen and carbon sources; GDH3 has a paralog, GDH1, that arose from the whole genome duplication"
5,YAL063C-A,17.64929825,1.117699829,0.340289958,3.234261063,0.001219579,0.002396232,S000028813,YAL063C-A,291,Uncharacterized,chrI,22395,22685,-1,Putative protein of unknown function; identified by expression profiling and mass spectrometry
6,YAL067C,94.18843367,1.166885495,0.227925752,5.126139668,2.96E-07,8.96E-07,S000000062,SEO1,1782,Verified,chrI,7235,9016,-1,Putative permease; member of the allantoate transporter subfamily of the major facilitator superfamily; mutation confers resistance to ethionine sulfoxide
7,YAR020C,13.42914822,1.250512428,0.351130327,3.46718078,0.000525948,0.001094616,S000000073,PAU7,168,Verified,chrI,176856,177023,-1,"Member of the seripauperin multigene family; active during alcoholic fermentation, regulated by anaerobiosis, inhibited by oxygen, repressed by heme"
8,YAR029W,26.14058586,1.102053092,0.268416197,4.055735403,5.00E-05,0.000118579,S000000077,YAR029W,225,Uncharacterized,chrI,186321,186545,1,Member of DUP240 gene family but contains no transmembrane domains; green fluorescent protein (GFP)-fusion protein localizes to the cytoplasm in a punctate pattern
9,YBL005W,1801.155899,1.738775002,0.09868529,17.61429792,1.91E-69,8.73E-68,S000000101,PDR3,2931,Verified,chrII,217470,220400,1,Transcriptional activator of the pleiotropic drug resistance network; regulates expression of ATP-binding cassette (ABC) transporters through binding to cis-acting PDRE sites (PDR responsive elements); has a role in response to drugs and organic solvents; post-translationally up-regulated in cells lacking functional mitochondrial genome; involved in diauxic shift; relative distribution to nucleus increases upon DNA replication stress; APCC(Cdh1) substrate
10,YBL006C,426.7013196,1.402987423,0.120185977,11.66279296,1.97E-31,2.65E-30,S000000102,LDB7,543,Verified,chrII,216587,217129,-1,"Component of the RSC chromatin remodeling complex; interacts with Rsc3p, Rsc30p, Npl6p, and Htl1p to form a module important for a broad range of RSC functions"
11,YBL025W,81.89785064,1.084211382,0.172220545,6.269691279,3.62E-10,1.45E-09,S000000121,RRN10,438,Verified,chrII,171481,171918,1,Protein involved in promoting high level transcription of rDNA; subunit of UAF (upstream activation factor) for RNA polymerase I
12,YBL043W,78.62261238,1.544142523,0.246332625,6.234043295,4.55E-10,1.81E-09,S000000139,ECM13,774,Verified,chrII,136688,137461,1,"Non-essential protein of unknown function; induced by treatment with 8-methoxypsoralen and UVA irradiation; ECM13 has a paralog, YJR115W, that arose from the whole genome duplication"
13,YBL048W,29.09039274,1.1223953,0.275173256,4.037866028,5.39E-05,0.000127449,S000000144,RRT1,312,Uncharacterized,chrII,127299,127610,1,Putative protein of unknown function; conserved across S. cerevisiae strains; identified in a screen for mutants with increased levels of rDNA transcription
14,YBL073W,9.395321242,1.646248688,0.444070845,3.499087393,0.000466854,0.00097683,S000000169,YBL073W,312,Dubious,chrII,87646,87957,1,"Dubious open reading frame; unlikely to encode a functional protein, based on available experimental and comparative sequence data; partially overlaps the essential gene AAR2/YBL074C"
15,YBL078C,96.4559643,1.720221178,0.171489268,9.956796923,2.36E-23,2.15E-22,S000000174,ATG8,354,Verified,chrII,80378,80731,-1,"Component of autophagosomes and Cvt vesicles; regulator of Atg1p, targets it to autophagosomes; binds the Atg1p-Atg13p complex, triggering its vacuolar degradation; unique ubiquitin-like protein whose conjugation target is lipid phosphatidylethanolamine (PE); Atg8p-PE is anchored to membranes, is involved in phagophore expansion, and may mediate membrane fusion during autophagosome formation; deconjugation of Atg8p-PE is required for efficient autophagosome biogenesis"
16,YBL098W,874.3111132,1.851319485,0.111188015,16.64046745,3.55E-62,1.30E-60,S000000194,BNA4,1383,Verified,chrII,39145,40527,1,Kynurenine 3-monooxygenase; required for the de novo biosynthesis of NAD from tryptophan via kynurenine; expression regulated by Hst1p; putative therapeutic target for Huntington disease
17,YBL100W-C,21.17539302,1.129300302,0.309175705,3.601776,0.000316051,0.000678787,S000028598,YBL100W-C,120,Uncharacterized,chrII,28427,28546,1,"Putative protein of unknown function; identified by gene-trapping, microarray-based expression analysis, and genome-wide homology searching"
18,YBL101C,1122.462854,1.28977085,0.096620769,13.34733057,1.23E-40,2.35E-39,S000000197,ECM21,3354,Verified,chrII,24946,28299,-1,"Protein involved in regulating endocytosis of plasma membrane proteins; identified as a substrate for ubiquitination by Rsp5p and deubiquitination by Ubp2p; promoter contains several Gcn4p binding elements; ECM21 has a paralog, CSR2, that arose from the whole genome duplication"
19,YBL102W,1427.362207,1.61380675,0.155089719,10.40389838,2.38E-25,2.38E-24,S000000198,SFT2,648,Verified,chrII,24098,24745,1,"Tetra-spanning membrane protein found mostly in the late Golgi; non-essential; can suppress some sed5 alleles; may be part of the transport machinery, but precise function is unknown; similar to mammalian syntaxin 5"
20,YBL103C,515.9216803,1.73697232,0.159214771,10.90162449,1.13E-27,1.31E-26,S000000199,RTG3,1461,Verified,chrII,22076,23536,-1,"bHLH/Zip transcription factor for retrograde (RTG) and TOR pathways; forms a complex with another bHLH/Zip protein, Rtg1p, to activate the pathways; target of Hog1p"
21,YBR018C,34.56811976,1.837581756,0.239513489,7.501596434,6.30E-14,3.43E-13,S000000222,GAL7,1101,Verified,chrII,274427,275527,-1,Galactose-1-phosphate uridyl transferase; synthesizes glucose-1-phosphate and UDP-galactose from UDP-D-glucose and alpha-D-galactose-1-phosphate in the second step of galactose catabolism; human homolog UGP2 can complement yeast null mutant
22,YBR035C,1333.62792,1.445810622,0.08981972,16.09363641,2.83E-58,9.40E-57,S000000239,PDX3,687,Verified,chrII,306269,306955,-1,Pyridoxine (pyridoxamine) phosphate oxidase; has homologs in E. coli and Myxococcus xanthus; transcription is under the general control of nitrogen metabolism
23,YBR043C,1222.983538,1.60429495,0.090650388,17.69464311,4.61E-70,2.15E-68,S000000247,QDR3,2070,Verified,chrII,321876,323945,-1,"Multidrug transporter of the major facilitator superfamily; member of the 12-spanner drug:H(+) antiporter DHA1 family; has a role in polyamine homeostasis; involved in spore wall asembly; sequence similarity to DTR1 and QDR1, and the triple mutant dtr1 qdr1 qdr3 exhibits reduced dityrosine fluorescence relative to the single mutants; expression is upregulated under polyamine stress; required for resistance to quinidine, barban, cisplatin, and bleomycin"
24,YBR045C,94.02067084,1.42628339,0.211894884,6.697665595,2.12E-11,9.49E-11,S000000249,GIP1,1920,Verified,chrII,328173,330092,-1,"Meiosis-specific regulatory subunit of the Glc7p protein phosphatase; regulates spore wall formation and septin organization, required for expression of some late meiotic genes and for normal localization of Glc7p"
25,YBR046C,878.6676644,2.855833116,0.161561579,17.65252612,9.73E-70,4.47E-68,S000000250,ZTA1,1005,Verified,chrII,330507,331511,-1,NADPH-dependent quinone reductase; GFP-tagged protein localizes to the cytoplasm and nucleus; has similarity to E. coli quinone oxidoreductase and to human zeta-crystallin
26,YBR047W,257.7825519,3.879121425,0.209598589,18.15401986,1.19E-73,6.07E-72,S000000251,FMP23,528,Uncharacterized,chrII,331833,332360,1,"Putative protein of unknown function; proposed to be involved in iron or copper homeostasis; the authentic, non-tagged protein is detected in highly purified mitochondria in high-throughput studies"
27,YBR085C-A,706.854671,1.20071379,0.140996031,8.517769728,1.63E-17,1.10E-16,S000007522,YBR085C-A,258,Verified,chrII,418907,419164,-1,Protein of unknown function; green fluorescent protein (GFP)-fusion protein localizes to the cytoplasm and to the nucleus; protein abundance increases in response to DNA replication stress
28,YBR104W,501.258068,1.137261908,0.137844709,8.247906205,1.61E-16,1.04E-15,S000000308,YMC2,990,Verified,chrII,449667,450656,1,"Putative mitochondrial inner membrane transporter; proposed role in oleate metabolism and glutamate biosynthesis; member of the mitochondrial carrier (MCF) family; YMC2 has a paralog, YMC1, that arose from the whole genome duplication"
29,YBR107C,271.6596249,1.30877046,0.185050052,7.068764378,1.56E-12,7.64E-12,S000000311,IML3,738,Verified,chrII,453793,454530,-1,Outer kinetochore protein and component of the Ctf19 complex; involved in the establishment of pericentromeric cohesion during mitosis; prevents non-disjunction of sister chromatids during meiosis II; forms a stable complex with Chl4p; required for localization of Sgo1p to pericentric sites during meiosis I; orthologous to human centromere constitutive-associated network (CCAN) subunit CENP-L and fission yeast fta1
30,YBR115C,6096.19029,1.720673576,0.083266961,20.66443199,7.24E-95,7.19E-93,S000000319,LYS2,4179,Verified,chrII,469748,473926,-1,"Alpha aminoadipate reductase; catalyzes the reduction of alpha-aminoadipate to alpha-aminoadipate 6-semialdehyde, which is the fifth step in biosynthesis of lysine; activation requires posttranslational phosphopantetheinylation by Lys5p"
31,YBR132C,565.8524503,1.033151256,0.116943113,8.829600195,1.05E-18,7.67E-18,S000000336,AGP2,1791,Verified,chrII,499652,501442,-1,Plasma membrane regulator of polyamine and carnitine transport; has similarity to transporters but lacks transport activity; may act as a sensor that transduces environmental signals; has a positive or negative regulatory effect on transcription of many transporter genes
32,YBR145W,2632.70805,4.221872882,0.131351439,32.06734292,1.26E-225,1.97E-222,S000000349,ADH5,1056,Verified,chrII,533762,534817,1,"Alcohol dehydrogenase isoenzyme V; involved in ethanol production; ADH5 has a paralog, ADH1, that arose from the whole genome duplication"
33,YBR147W,819.0594468,4.584971912,0.315762583,14.36602855,8.45E-47,1.94E-45,S000000351,RTC2,891,Verified,chrII,536575,537465,1,"Putative vacuolar membrane transporter for cationic amino acids; likely contributes to amino acid homeostasis by exporting cationic amino acids from the vacuole; positive regulation by Lys14p suggests that lysine may be the primary substrate; member of the PQ-loop family, with seven transmembrane domains; similar to mammalian PQLC2 vacuolar transporter; RTC2 has a paralog, YPQ1, that arose from the whole genome duplication"
34,YBR167C,82.98331711,1.060546377,0.194340161,5.441194491,5.29E-08,1.72E-07,S000000371,POP7,423,Verified,chrII,571468,571890,-1,"Subunit of RNase MRP, nuclear RNase P and telomerase; forms a soluble heterodimer with Pop6p that binds P3 domain of RNase MRP and RNase P RNAs; RNase MRP cleaves pre-rRNA, nuclear RNase P cleaves tRNA precursors to generate mature 5' ends and facilitates turnover of nuclear RNAs, while telomerase replenishes telomeric DNA"
35,YBR177C,2344.014953,1.237870279,0.090074782,13.74273431,5.63E-43,1.17E-41,S000000381,EHT1,1356,Verified,chrII,584807,586162,-1,"Acyl-coenzymeA:ethanol O-acyltransferase; plays a minor role in medium-chain fatty acid ethyl ester biosynthesis; possesses short-chain esterase activity; localizes to lipid particles and the mitochondrial outer membrane; EHT1 has a paralog, EEB1, that arose from the whole genome duplication"
36,YBR183W,225.8726709,1.226144204,0.129105889,9.480829129,2.52E-21,2.08E-20,S000000387,YPC1,951,Verified,chrII,596115,597065,1,"Alkaline ceramidase; also has reverse (CoA-independent) ceramide synthase activity; catalyzes both breakdown and synthesis of phytoceramide; overexpression confers fumonisin B1 resistance; YPC1 has a paralog, YDC1, that arose from the whole genome duplication"
37,YBR204C,287.0340069,1.183072917,0.107289234,11.01356051,3.29E-28,3.82E-27,S000000408,LDH1,1128,Verified,chrII,632254,633381,-1,"Serine hydrolase; exhibits active esterase plus weak triacylglycerol lipase activities; proposed role in lipid homeostasis, regulating phospholipid and non-polar lipid levels and required for mobilization of LD-stored lipids; localizes to the lipid droplet (LD) surface; contains a classical serine containing catalytic triad (GxSxG motif)"
38,YBR209W,30.35234078,1.498100767,0.280854418,5.243024861,1.58E-07,4.91E-07,S000000413,YBR209W,318,Uncharacterized,chrII,642583,642900,1,Putative protein of unknown function; conserved across S. cerevisiae strains; YBR209W is not an essential gene
39,YBR214W,1114.65128,1.387471576,0.125469332,11.05596904,2.05E-28,2.43E-27,S000000418,SDS24,1584,Verified,chrII,651415,652998,1,"Protein involved in cell separation during budding; one of two S. cerevisiae homologs (Sds23p and Sds24p) of the S. pombe Sds23 protein, which is implicated in APC/cyclosome regulation; may play an indirect role in fluid-phase endocytosis; protein abundance increases in response to DNA replication stress; SDS24 has a paralog, SDS23, that arose from the whole genome duplication"
40,YBR218C,6301.68416,1.031683241,0.093342131,11.05272929,2.13E-28,2.51E-27,S000000422,PYC2,3543,Verified,chrII,658707,662249,-1,"Pyruvate carboxylase isoform; cytoplasmic enzyme that converts pyruvate to oxaloacetate; differentially regulated than isoform Pyc1p; mutations in the human homolog are associated with lactic acidosis; PYC2 has a paralog, PYC1, that arose from the whole genome duplication"
41,YBR241C,477.5463081,1.390910462,0.150553225,9.236612047,2.54E-20,2.00E-19,S000000445,YBR241C,1467,Uncharacterized,chrII,702589,704055,-1,"Putative transporter, member of the sugar porter family; green fluorescent protein (GFP)-fusion protein localizes to the vacuolar membrane; YBR241C is not an essential gene; YBR241C has a paralog, VPS73, that arose from the whole genome duplication"
42,YBR248C,1594.961228,1.480485018,0.07203725,20.54860568,7.92E-94,7.62E-92,S000000452,HIS7,1659,Verified,chrII,714807,716465,-1,"Imidazole glycerol phosphate synthase; glutamine amidotransferase:cyclase that catalyzes the fifth step of histidine biosynthesis and also produces 5-aminoimidazole-4-carboxamide ribotide (AICAR), a purine precursor"
43,YBR250W,74.56786014,1.675920982,0.220927642,7.51843432,5.54E-14,3.02E-13,S000000454,SPO23,1572,Verified,chrII,719033,720604,1,Protein of unknown function; associates with meiosis-specific protein Spo1p
44,YBR256C,2137.513871,2.933719306,0.183312055,15.99634988,1.35E-57,4.30E-56,S000000460,RIB5,717,Verified,chrII,727386,728102,-1,Riboflavin synthase; catalyzes the last step of the riboflavin biosynthesis pathway
45,YBR280C,251.1665932,1.118458997,0.099582968,11.21432257,3.47E-29,4.24E-28,S000000484,SAF1,1914,Verified,chrII,762784,764697,-1,F-Box protein involved in proteasome-dependent degradation of Aah1p; involved in proteasome-dependent degradation of Aah1p during entry of cells into quiescence; interacts with Skp1
46,YBR284W,71.21485456,1.03969399,0.177262548,5.839449017,5.24E-09,1.88E-08,S000000488,YBR284W,2394,Uncharacterized,chrII,771239,773632,1,"Putative metallo-dependent hydrolase superfamily protein; similar to AMP deaminases but lacks key catalytic residues and does not rescue purine nucleotide metabolic defect of quadruple aah1 ade8 amd1 his1 mutant; null mutant exhibits longer telomeres, altered Ty mobility, decreased resistance to rapamycin and wortmannin; induced in response to hydrostatic pressure; not an essential gene; YBR284W has a paralog, YJL070C, that arose from the whole genome duplication"
47,YBR285W,37.18454321,1.167124329,0.235600909,4.903577082,9.41E-07,2.72E-06,S000000489,YBR285W,435,Uncharacterized,chrII,773922,774356,1,Putative protein of unknown function; YBR285W is not an essential gene
48,YCL009C,8506.118735,1.535821472,0.148679125,10.33077612,5.11E-25,5.03E-24,S000000515,ILV6,930,Verified,chrIII,104619,105548,-1,"Regulatory subunit of acetolactate synthase; acetolactate synthase catalyzes the first step of branched-chain amino acid biosynthesis; enhances activity of the Ilv2p catalytic subunit, localizes to mitochondria"
49,YCL026C-A,144.0480517,3.41431188,0.436566415,7.646997094,2.06E-14,1.15E-13,S000000589,FRM2,582,Verified,chrIII,74704,75285,-1,"Type II nitroreductase, using NADH as reductant; mutants are defective in fatty acid mediated repression of genes involved in fatty acid biosynthesis indicative of a role in lipid signaling; involved in the oxidative stress response; transcription induction by cadmium and selenite indicates a possible role in the metal stress response; expression induced in cells treated with the mycotoxin patulin"
50,YCL030C,10583.1798,2.873452188,0.096437024,29.79307981,4.80E-195,5.00E-192,S000000535,HIS4,2400,Verified,chrIII,65934,68333,-1,"Multifunctional enzyme containing phosphoribosyl-ATP pyrophosphatase; phosphoribosyl-AMP cyclohydrolase, and histidinol dehydrogenase activities; catalyzes the second, third, ninth and tenth steps in histidine biosynthesis"
51,YCL048W-A,27.99430139,1.969358251,0.366227978,5.058499967,4.23E-07,1.26E-06,S000087203,YCL048W-A,240,Uncharacterized,chrIII,41488,41727,1,"Putative protein of unknown function; SWAT-GFP and mCherry fusion proteins localize to the cell periphery and vacuole; YCL048W-A has a paralog, YDR524C-B, that arose from the whole genome duplication"
52,YCL049C,551.7592212,1.068494059,0.101651912,10.51036529,7.74E-26,8.08E-25,S000000554,YCL049C,939,Uncharacterized,chrIII,39786,40724,-1,Protein of unknown function; localizes to membrane fraction; YCL049C is not an essential gene
53,YCL067C,118.1629643,1.092483068,0.192496689,5.667737213,1.45E-08,4.98E-08,S000000572,HMLALPHA2,633,Verified,chrIII,12386,13018,-1,Silenced copy of ALPHA2 at HML; homeobox-domain protein that associates with Mcm1p in haploid cells to repress a-specific gene expression and interacts with a1p in diploid cells to repress haploid-specific gene expression
54,YCR005C,1494.342364,2.058694114,0.201585386,10.1912385,2.17E-24,2.08E-23,S000000598,CIT2,1383,Verified,chrIII,120946,122328,-1,"Citrate synthase, peroxisomal isozyme involved in glyoxylate cycle; catalyzes condensation of acetyl coenzyme A and oxaloacetate to form citrate; expression is controlled by Rtg1p and Rtg2p transcription factors; SCF-Ucc1 regulates level of Cit2p to maintain citrate homeostasis; oxaloacetate-dependent positive feedback loop inhibits Cit2p ubiquitination; CIT2 has a paralog, CIT1, that arose from the whole genome duplication"
55,YCR007C,81.21327464,1.085441778,0.173457475,6.239463144,4.39E-10,1.75E-09,S000000600,YCR007C,720,Uncharacterized,chrIII,126011,126730,-1,Putative integral membrane protein; member of DUP240 gene family; SWAT-GFP and mCherry fusion proteins localize to the cell periphery and vacuole; YCR007C is not an essential gene
56,YCR010C,45.25703252,1.475691981,0.226323623,6.43544588,1.23E-10,5.13E-10,S000000603,ADY2,852,Verified,chrIII,132273,133124,-1,"Acetate transporter required for normal sporulation; phosphorylated in mitochondria; ADY2 has a paralog, ATO2, that arose from the whole genome duplication"
57,YCR023C,1409.034063,1.624623006,0.168683384,9.629418807,6.01E-22,5.14E-21,S000000617,YCR023C,1836,Verified,chrIII,158538,160373,-1,Vacuolar membrane protein of unknown function; member of the multidrug resistance family; YCR023C is not an essential gene
58,YCR050C,68.77957067,1.10930031,0.196234084,5.630232778,1.80E-08,6.13E-08,S000000646,YCR050C,309,Uncharacterized,chrIII,213464,213772,-1,Non-essential protein of unknown function; deletion mutant is synthetically sick or lethal with alpha-synuclein
59,YCR060W,315.1689081,1.279074574,0.171625859,7.449158676,9.39E-14,5.03E-13,S000000656,TAH1,336,Verified,chrIII,224399,224734,1,Component of conserved R2TP complex (Rvb1-Rvb2-Tah1-Pih1); R2TP complex interacts with Hsp90 (Hsp82p and Hsc82p) to mediate assembly of large protein complexes such as box C/D snoRNPs and RNA polymerase II; contains a single TPR domain with at least two TPR motifs; plays a role in determining prion variants
60,YCR061W,1032.88217,2.025483461,0.115878081,17.46784862,2.52E-68,1.07E-66,S000000657,YCR061W,1896,Uncharacterized,chrIII,225563,227458,1,Protein of unknown function; green fluorescent protein (GFP)-fusion protein localizes to the cytoplasm in a punctate pattern; induced by treatment with 8-methoxypsoralen and UVA irradiation
61,YCR091W,237.4194174,1.188603315,0.106831322,11.1086736,1.14E-28,1.36E-27,S000000687,KIN82,2163,Verified,chrIII,274404,276566,1,"Putative serine/threonine protein kinase; implicated in the regulation of phospholipid asymmetry through the activation of phospholipid translocases (flippases); involved in the phosphorylation of upstream inhibitory kinase Ypk1p along with Fpk1p; has a redundant role in the cellular response to mating pheromone; KIN82 has a paralog, FPK1, that arose from the whole genome duplication"
62,YCR099C,57.31398009,1.75647983,0.248484529,6.988077336,2.79E-12,1.34E-11,S000000696,YCR099C,468,Uncharacterized,chrIII,300832,301299,-1,Putative protein of unknown function
63,YCR100C,103.156888,1.650027221,0.230303675,7.13003368,1.00E-12,4.96E-12,S000000697,EMA35,951,Uncharacterized,chrIII,301271,302221,-1,Putative protein of unknown function
64,YCR101C,62.51705031,1.525785338,0.236000613,6.413031958,1.43E-10,5.91E-10,S000000698,YCR101C,549,Uncharacterized,chrIII,302482,303030,-1,Putative protein of unknown function; localizes to the membrane fraction; YCR101C is not an essential gene
65,YCR106W,417.8825363,1.089429171,0.143871717,7.569371788,3.75E-14,2.07E-13,S000000703,RDS1,2499,Verified,chrIII,310958,313456,1,Putative zinc cluster transcription factor; involved in conferring resistance to cycloheximide
66,YCR107W,263.6014768,1.104459493,0.146250706,7.547454805,4.44E-14,2.44E-13,S000000704,AAD3,1092,Verified,chrIII,313890,314981,1,"Putative aryl-alcohol dehydrogenase; similar to P. chrysosporium aryl-alcohol dehydrogenase; mutational analysis has not yet revealed a physiological role; AAD3 has a paralog, AAD15, that arose from a segmental duplication; members of the AAD gene family comprise three pairs (AAD3 + AAD15, AAD6/AAD16 + AAD4, AAD10 + AAD14) whose two genes are more related to one another than to other members of the family"
67,YDL020C,1011.013324,1.705460207,0.086783687,19.64183043,6.79E-86,4.94E-84,S000002178,RPN4,1596,Verified,chrIV,415113,416708,-1,Transcription factor that stimulates expression of proteasome genes; Rpn4p levels are in turn regulated by the 26S proteasome in a negative feedback control mechanism; RPN4 is transcriptionally regulated by various stress responses; relative distribution to the nucleus increases upon DNA replication stress
68,YDL021W,241.5447727,1.238056967,0.19473239,6.359687969,2.02E-10,8.22E-10,S000002179,GPM2,936,Verified,chrIV,413953,414888,1,"Nonfunctional homolog of Gpm1p phosphoglycerate mutase; if functional, would convert 3-phosphoglycerate to 2-phosphoglycerate in glycolysis; GPM2 has a paralog, GPM3, that arose from the whole genome duplication"
69,YDL024C,79.23721464,1.474782783,0.212324865,6.902836142,5.10E-12,2.40E-11,S000002182,DIA3,1407,Verified,chrIV,408451,409857,-1,Protein of unknown function; involved in invasive and pseudohyphal growth
70,YDL025C,535.2786098,1.150191119,0.112430511,10.22716524,1.50E-24,1.44E-23,S000002183,RTK1,1863,Verified,chrIV,405344,407206,-1,"Putative protein kinase, potentially phosphorylated by Cdc28p; interacts with ribosome biogenesis factors, Cka2, Gus1 and Arc1; protein abundance increases in response to DNA replication stress"
71,YDL054C,1001.67058,1.649193968,0.157471621,10.47223901,1.16E-25,1.20E-24,S000002212,MCH1,1461,Verified,chrIV,359825,361285,-1,Protein with similarity to mammalian monocarboxylate permeases; monocarboxylate permeases are involved in transport of monocarboxylic acids across the plasma membrane but mutant is not deficient in monocarboxylate transport
72,YDL066W,4300.02603,2.664696153,0.165252764,16.1191433,1.87E-58,6.26E-57,S000002224,IDP1,1287,Verified,chrIV,334835,336121,1,Mitochondrial NADP-specific isocitrate dehydrogenase; catalyzes the oxidation of isocitrate to alpha-ketoglutarate; not required for mitochondrial respiration and may function to divert alpha-ketoglutarate to biosynthetic processes
73,YDL071C,20.4694865,1.080413849,0.325768275,3.285073046,0.001019559,0.002029381,S000002229,YDL071C,375,Dubious,chrIV,330666,331040,-1,"Dubious open reading frame; unlikely to encode a functional protein, based on available experimental and comparative sequence data; partially overlaps the verified ORF BDF2/YDL070W"
74,YDL085W,101.9497779,1.879530642,0.212960832,8.755798542,2.03E-18,1.45E-17,S000002243,NDE2,1638,Verified,chrIV,303211,304848,1,"Mitochondrial external NADH dehydrogenase; catalyzes the oxidation of cytosolic NADH; Nde1p and Nde2p are involved in providing the cytosolic NADH to the mitochondrial respiratory chain; NDE2 has a paralog, NDE1, that arose from the whole genome duplication"
75,YDL110C,292.8538596,1.04574684,0.129097222,8.096581617,5.65E-16,3.54E-15,S000002268,TMA17,453,Verified,chrIV,264512,264964,-1,ATPase dedicated chaperone that adapts proteasome assembly to stress; Tma17p is induced upon stress; interacts with Rpt6p to assist its pairing to Rpt3p and early steps in proteasome biogenesis; associates with ribosomes; heterozygous deletion demonstrated increases in chromosome instability in a rad9 deletion background; protein abundance is decreased upon intracellular iron depletion
76,YDL130W-A,292.6454918,1.287349921,0.140455189,9.159321127,5.22E-20,4.05E-19,S000007232,STF1,261,Verified,chrIV,229171,229431,1,"Protein involved in regulation of the mitochondrial F1F0-ATP synthase; Stf1p and Stf2p act as stabilizing factors that enhance inhibitory action of the Inh1p protein; protein abundance increases in response to DNA replication stress; STF1 has a paralog, INH1, that arose from the whole genome duplication"
77,YDL131W,3028.04532,1.576136535,0.070509951,22.35175097,1.16E-110,2.20E-108,S000002289,LYS21,1323,Verified,chrIV,227393,228715,1,"Homocitrate synthase isozyme; catalyzes the condensation of acetyl-CoA and alpha-ketoglutarate to form homocitrate, which is the first step in the lysine biosynthesis pathway; LYS21 has a paralog, LYS20, that arose from the whole genome duplication"
78,YDL142C,258.097868,1.023536514,0.143289677,7.13874812,9.42E-13,4.67E-12,S000002301,CRD1,852,Verified,chrIV,201719,202570,-1,"Cardiolipin synthase; produces cardiolipin, which is a phospholipid of the mitochondrial inner membrane that is required for normal mitochondrial membrane potential and function and for correct integration of membrane-multispanning proteins into the mitochondrial outer membrane; required to maintain tubular mitochondrial morphology and functions in mitochondrial fusion; also required for normal vacuolar ion homeostasis"
79,YDL169C,42.46454866,1.43761939,0.2350308,6.037580838,1.56E-09,5.96E-09,S000002328,UGX2,672,Verified,chrIV,158064,158735,-1,Protein of unknown function; transcript accumulates in response to any combination of stress conditions
80,YDL170W,717.0553157,2.068006355,0.147656694,13.99501937,1.67E-44,3.60E-43,S000002329,UGA3,1587,Verified,chrIV,156318,157904,1,"Transcriptional activator for GABA-dependent induction of GABA genes; binds to DNA elements found in the promoters of target genes and increases their expression in the presence of GABA (gamma-aminobutyrate); zinc finger transcription factor of the Zn(2)-Cys(6) binuclear cluster domain type; localized to the nucleus; examples of GABA genes include UGA1, UGA2, and UGA4"
81,YDL182W,4854.883136,2.633555002,0.113700313,23.15795475,1.21E-118,2.44E-116,S000002341,LYS20,1287,Verified,chrIV,133437,134723,1,"Homocitrate synthase isozyme and functions in DNA repair; catalyzes the condensation of acetyl-CoA and alpha-ketoglutarate to form homocitrate, which is the first step in the lysine biosynthesis pathway; LYS20 has a paralog, LYS21, that arose from the whole genome duplication"
82,YDL183C,129.7875909,1.456867396,0.175668911,8.266495373,1.38E-16,8.93E-16,S000002342,YDL183C,963,Verified,chrIV,130871,131833,-1,Protein that may form an active mitochondrial KHE system; mitochondrial inner-membrane protein; non-essential gene; KHE system stands for K+/H+ exchanger system
83,YDL196W,13.23045259,1.423264776,0.375884055,3.659971522,0.000252243,0.000549486,S000002355,YDL196W,330,Dubious,chrIV,106741,107070,1,"Dubious open reading frame; unlikely to encode a functional protein, based on available experimental and comparative sequence data; open reading frame is located in promoter region of essential gene SEC31"
84,YDL198C,2554.784876,2.442466839,0.143259605,17.04473792,3.82E-65,1.52E-63,S000002357,GGC1,903,Verified,chrIV,103649,104551,-1,Mitochondrial GTP/GDP transporter; essential for mitochondrial genome maintenance; has a role in mitochondrial iron transport; member of the mitochondrial carrier family
85,YDL214C,191.8055509,1.784380881,0.224309783,7.93521708,2.10E-15,1.27E-14,S000002373,PRR2,2100,Verified,chrIV,74446,76545,-1,"Serine/threonine protein kinase; inhibits pheromone induced signalling downstream of MAPK, possibly at the level of the Ste12p transcription factor; mutant has increased aneuploidy tolerance; PRR2 has a paralog, NPR1, that arose from the whole genome duplication"
86,YDL245C,185.6162432,1.261348093,0.138719693,9.076878008,1.12E-19,8.53E-19,S000002404,HXT15,1704,Verified,chrIV,11657,13360,-1,"Putative transmembrane polyol transporter; supports growth on and uptake of mannitol, sorbitol and xylitol with moderate affinity when overexpressed in a strain deleted for hexose family members; minor hexose transport activity when overexpressed in a similar strain; similarity to hexose transporters; expression is induced by low levels of glucose and repressed by high levels of glucose"
87,YDR009W,119.3459282,1.425932342,0.173430706,8.193585824,2.54E-16,1.61E-15,S000002416,GAL3,1563,Verified,chrIV,463434,464996,1,"Transcriptional regulator; involved in activation of the GAL genes in response to galactose; forms a complex with Gal80p to relieve Gal80p inhibition of Gal4p; binds galactose and ATP but does not have galactokinase activity; GAL3 has a paralog, GAL1, that arose from the whole genome duplication"
88,YDR010C,16.89298361,1.090087746,0.348608092,3.100901398,0.001929325,0.003681972,S000002417,YDR010C,333,Uncharacterized,chrIV,465051,465383,-1,Putative protein of unknown function; conserved across S. cerevisiae strains
89,YDR011W,16012.90514,3.177345749,0.131206065,24.21179059,1.67E-129,4.54E-127,S000002418,SNQ2,4506,Verified,chrIV,465919,470424,1,Plasma membrane ATP-binding cassette (ABC) transporter; multidrug transporter involved in multidrug resistance and resistance to singlet oxygen species
90,YDR019C,863.2779427,1.383807876,0.107185945,12.90510346,4.21E-38,7.22E-37,S000002426,GCV1,1203,Verified,chrIV,484163,485365,-1,"T subunit of the mitochondrial glycine decarboxylase complex; glycine decarboxylase is required for the catabolism of glycine to 5,10-methylene-THF; expression is regulated by levels of levels of 5,10-methylene-THF in the cytoplasm"
91,YDR022C,90.21185583,1.078555861,0.170828126,6.290992084,3.15E-10,1.27E-09,S000002429,ATG31,591,Verified,chrIV,488072,488662,-1,"Autophagy-specific protein required for autophagosome formation; forms a complex with Atg17p and Atg29p that localizes other proteins to the pre-autophagosomal structure; constitutively phosphorylated, and phosphorylation of residue S174 is required for function; high-copy suppressor of CIK1 deletion"
92,YDR034C,836.9159054,1.539850914,0.121754538,12.64250133,1.23E-36,2.00E-35,S000002441,LYS14,2373,Verified,chrIV,509737,512109,-1,Transcriptional activator involved in regulating lysine biosynthesis; involved in the regulation of genes of the lysine biosynthesis pathway; requires 2-aminoadipate semialdehyde as co-inducer
93,YDR034W-B,28.30609726,1.375401993,0.332203354,4.098197778,4.16E-05,9.96E-05,S000007234,YDR034W-B,156,Uncharacterized,chrIV,521314,521469,1,"Predicted tail-anchored plasma membrane protein; contains conserved CYSTM module; related proteins in other organisms may be involved in response to stress; N- and C-terminal fusion proteins localize to the cell periphery; YDR034W-B has a paralog, YBR056W-A, that arose from the whole genome duplication"
94,YDR035W,4278.177042,2.412380652,0.102688611,23.4881737,5.39E-122,1.25E-119,S000002442,ARO3,1113,Verified,chrIV,521816,522928,1,3-deoxy-D-arabino-heptulosonate-7-phosphate (DAHP) synthase; catalyzes the first step in aromatic amino acid biosynthesis and is feedback-inhibited by phenylalanine or high concentration of tyrosine or tryptophan
95,YDR058C,141.0021158,1.117577614,0.141987702,7.85321257,4.06E-15,2.40E-14,S000002465,TGL2,981,Verified,chrIV,567723,568703,-1,Triacylglycerol lipase that is localized to the mitochondria; has lipolytic activity towards triacylglycerols and diacylglycerols when expressed in E. coli
96,YDR070C,102.7987344,1.967067989,0.221329258,8.806215196,1.29E-18,9.41E-18,S000002477,FMP16,282,Verified,chrIV,588098,588379,-1,"Protein of unknown function; may be involved in responding to conditions of stress; the authentic, non-tagged protein is detected in highly purified mitochondria in high-throughput studies; protein abundance increases in response to DNA replication stress"
97,YDR085C,221.187893,1.0763627,0.130959035,8.212293816,2.17E-16,1.38E-15,S000002492,AFR1,1863,Verified,chrIV,614288,616150,-1,"Protein required for pheromone-induced projection (shmoo) formation; regulates septin architecture during mating; has an RVXF motif that mediates targeting of Glc7p to mating projections; interacts with Cdc12p; AFR1 has a paralog, YER158C, that arose from the whole genome duplication"
98,YDR102C,17.62185807,1.011458021,0.326813955,3.056166321,0.002241869,0.004226828,S000002509,YDR102C,333,Uncharacterized,chrIV,657648,657980,-1,Putative protein of unknown function; conserved among S. cerevisiae strains; YDR102C is not an essential gene; homozygous diploid deletion strain exhibits high budding index
99,YDR119W-A,25.79220111,1.063875132,0.28251554,3.715742474,0.000202608,0.000447125,S000113555,COX26,201,Verified,chrIV,691014,691214,1,Stabilizes or regulates formation of respiratory chain supercomplexes composed of Complex III (ubiquinol-cytochrome c reductase) and Complex IV (cytochrome c oxidase)
100,YDR125C,139.0523481,1.038533981,0.157493931,6.584895992,4.55E-11,1.97E-10,S000002532,ECM18,1362,Verified,chrIV,701397,702758,-1,"Protein of unknown function; ECM18 has a paralog, ICT1, that arose from the whole genome duplication"
101,YDR126W,243.0034114,1.839513746,0.192781135,9.52322266,1.68E-21,1.40E-20,S000002533,SWF1,1011,Verified,chrIV,703234,704244,1,"Palmitoyltransferase that acts on transmembrane proteins; including the SNAREs Snc1p, Syn8p, Tlg1p and likely all SNAREs; contains an Asp-His-His-Cys-cysteine rich (DHHC-CRD) domain; may have a role in vacuole fusion"
102,YDR127W,6963.734508,1.700867699,0.094963154,17.91061792,9.74E-72,4.62E-70,S000002534,ARO1,4767,Verified,chrIV,704484,709250,1,"Pentafunctional arom protein; catalyzes steps 2 through 6 in the biosynthesis of chorismate, which is a precursor to aromatic amino acids"
103,YDR158W,11576.86667,1.814345565,0.107537981,16.87140659,7.30E-64,2.80E-62,S000002565,HOM2,1098,Verified,chrIV,770357,771454,1,Aspartic beta semi-aldehyde dehydrogenase; catalyzes the second step in the common pathway for methionine and threonine biosynthesis; expression regulated by Gcn4p and the general control of amino acid synthesis
104,YDR169C-A,10.37204424,1.410558735,0.398910104,3.392371632,0.000692904,0.001414311,S000028538,YDR169C-A,150,Uncharacterized,chrIV,794574,794723,-1,Putative protein of unknown function; identified by fungal homology and RT-PCR
105,YDR170W-A,162.7673397,1.552336808,0.193158344,8.013507265,1.11E-15,6.85E-15,S000007227,YDR170W-A,1323,,chrIV,803195,804517,1,Retrotransposon TYA Gag gene; Gag is a nucleocapsid protein that is the structural constituent of virus-like particles (VLPs); similar to retroviral Gag; YDR170W-A is part of a mutant retrotransposon; distribution in the cytoplasm becomes irregular rather than punctate upon DNA replication stress
106,YDR204W,459.7056479,1.089118614,0.098375756,11.06421576,1.87E-28,2.22E-27,S000002612,COQ4,1008,Verified,chrIV,858137,859144,1,Protein with a role in ubiquinone (Coenzyme Q) biosynthesis; possibly functioning in stabilization of Coq7p; located on matrix face of mitochondrial inner membrane; component of a mitochondrial ubiquinone-synthesizing complex; human homolog COQ4 can complement yeast coq4 null mutant
107,YDR241W,42.25791463,1.276721672,0.242711165,5.213625012,1.85E-07,5.71E-07,S000002649,BUD26,288,Dubious,chrIV,945151,945438,1,"Dubious open reading frame; unlikely to encode a functional protein, based on available experimental and comparative sequence data; not conserved in closely related Saccharomyces species; 1% of ORF overlaps the verified gene SNU56; diploid mutant displays a weak budding pattern phenotype in a systematic assay"
108,YDR242W,293.8291458,1.049010221,0.176883906,5.927567264,3.07E-09,1.13E-08,S000002650,AMD2,1650,Verified,chrIV,946807,948456,1,Putative amidase
109,YDR315C,92.8127891,1.183035069,0.151469886,7.778810527,7.32E-15,4.25E-14,S000002723,IPK1,846,Verified,chrIV,1092741,1093586,-1,"Inositol 1,3,4,5,6-pentakisphosphate 2-kinase; nuclear protein required for synthesis of 1,2,3,4,5,6-hexakisphosphate (phytate), which is integral to cell function; has 2 motifs conserved in other fungi; ipk1 gle1 double mutant is inviable; human IPPK can complement ipk1 null mutant"
110,YDR354W,1326.795713,1.339747576,0.151388341,8.849139514,8.82E-19,6.47E-18,S000002762,TRP4,1143,Verified,chrIV,1184747,1185889,1,Anthranilate phosphoribosyl transferase; transferase of the tryptophan biosynthetic pathway; catalyzes the phosphoribosylation of anthranilate; subject to the general control system of amino acid biosynthesis
111,YDR358W,256.6449375,1.031583276,0.115789775,8.90082203,5.54E-19,4.12E-18,S000002766,GGA1,1674,Verified,chrIV,1190059,1191732,1,"Golgi-localized protein with homology to gamma-adaptin; interacts with and regulates Arf1p and Arf2p in a GTP-dependent manner in order to facilitate traffic through the late Golgi; GGA1 has a paralog, GGA2, that arose from the whole genome duplication"
112,YDR379C-A,122.2470905,2.212563347,0.16891747,12.97538069,1.69E-38,2.94E-37,S000007605,SDH6,240,Verified,chrIV,1233278,1233517,-1,Mitochondrial protein involved in assembly of succinate dehydrogenase; has a role in maturation of the Sdh2p subunit; member of the LYR protein family; mutations in human ortholog SDHAF1 are associated with infantile leukoencephalopathy
113,YDR380W,705.9187775,2.591677547,0.199279841,12.97343229,1.73E-38,3.00E-37,S000002788,ARO10,1908,Verified,chrIV,1234218,1236125,1,"Phenylpyruvate decarboxylase; catalyzes decarboxylation of phenylpyruvate to phenylacetaldehyde, which is the first specific step in the Ehrlich pathway; involved in protein N-terminal Met and Ala catabolism"
114,YDR406W,4966.608572,2.695197956,0.123515556,21.81366851,1.72E-105,2.76E-103,S000002814,PDR15,4590,Verified,chrIV,1279210,1283799,1,"Plasma membrane ATP binding cassette (ABC) transporter; multidrug transporter and general stress response factor implicated in cellular detoxification; regulated by Pdr1p, Pdr3p and Pdr8p; promoter contains a PDR responsive element; PDR15 has a paralog, PDR5, that arose from the whole genome duplication"
115,YDR406W-A,9.629934899,1.561114406,0.41909835,3.446807626,0.000567252,0.001175493,S000028543,YDR406W-A,246,Dubious,chrIV,1283799,1284044,1,Dubious open reading frame unlikely to encode a functional protein; identified by fungal homology and RT-PCR
116,YDR425W,343.1968409,1.529629132,0.189439829,8.066753815,7.22E-16,4.48E-15,S000002833,SNX41,1878,Verified,chrIV,1320064,1321941,1,Sorting nexin; involved in the retrieval of late-Golgi SNAREs from the post-Golgi endosome to the trans-Golgi network; interacts with Snx4p
117,YDR426C,14.93872457,1.733528567,0.345871706,4.778424238,1.77E-06,4.93E-06,S000002834,YDR426C,378,Dubious,chrIV,1321629,1322006,-1,"Dubious open reading frame; unlikely to encode a functional protein, based on available experimental and comparative sequence data; partially overlaps the verified ORF SNX41"
118,YDR435C,345.0407083,1.35111104,0.137979389,9.781691385,1.35E-22,1.20E-21,S000002843,PPM1,987,Verified,chrIV,1332983,1333969,-1,"Carboxyl methyltransferase; methylates the C terminus of the protein phosphatase 2A catalytic subunit (Pph21p or Pph22p), which is important for complex formation with regulatory subunits; required for methionine to inhibit autophagy and promote growth"
119,YDR453C,173.0930297,1.067309848,0.171048677,6.242759951,4.30E-10,1.72E-09,S000002861,TSA2,591,Verified,chrIV,1365072,1365662,-1,"Stress inducible cytoplasmic thioredoxin peroxidase; cooperates with Tsa1p in the removal of reactive oxygen, nitrogen and sulfur species using thioredoxin as hydrogen donor; deletion enhances the mutator phenotype of tsa1 mutants; protein abundance increases in response to DNA replication stress; TSA2 has a paralog, TSA1, that arose from the whole genome duplication"
120,YDR461C-A,97.03711408,1.031411061,0.154600505,6.654545398,2.84E-11,1.26E-10,S000087209,CMI8,243,Uncharacterized,chrIV,1385524,1385766,-1,Putative protein of unknown function
121,YDR487C,1852.785001,1.387616844,0.108656488,12.76907671,2.44E-37,4.06E-36,S000002895,RIB3,627,Verified,chrIV,1428354,1428980,-1,"3,4-dihydroxy-2-butanone-4-phosphate synthase (DHBP synthase); required for riboflavin biosynthesis from ribulose-5-phosphate, also has an unrelated function in mitochondrial respiration"
122,YDR525W-A,317.1440575,1.061223768,0.146064342,7.264023775,3.76E-13,1.91E-12,S000007236,SNA2,240,Verified,chrIV,1490596,1490835,1,"Protein of unknown function; has similarity to Pmp3p, which is involved in cation transport; green fluorescent protein (GFP)-fusion protein localizes to the cytoplasm in a punctate pattern"
123,YDR530C,251.2959414,1.366363392,0.147938547,9.221318774,2.93E-20,2.30E-19,S000002938,APA2,978,Verified,chrIV,1496791,1497768,-1,"Diadenosine 5',5'''-P1,P4-tetraphosphate phosphorylase II; AP4A phosphorylase involved in catabolism of bis(5'-nucleosidyl) tetraphosphates; APA2 has a paralog, APA1, that arose from the whole genome duplication"
124,YDR531W,852.174612,1.338298327,0.114820784,11.65171385,2.25E-31,3.00E-30,S000002939,CAB1,1104,Verified,chrIV,1498232,1499335,1,"Pantothenate kinase, ATP:D-pantothenate 4'-phosphotransferase; catalyzes the first committed step in the universal biosynthetic pathway for synthesis of coenzyme A (CoA); transcriptionally regulated by Upc2p via a sterol response element"
125,YDR533C,730.5440267,1.978464579,0.188116086,10.51037985,7.74E-26,8.08E-25,S000002941,HSP31,714,Verified,chrIV,1501447,1502160,-1,"Methylglyoxalase that converts methylglyoxal to D-lactate; involved in oxidative stress resistance, diauxic shift, and stationary phase survival; has similarity to E. coli Hsp31 and C. albicans Glx3p; member of the DJ-1/ThiJ/PfpI superfamily, which includes human DJ-1 involved in Parkinson's disease and cancer; exists as a dimer and contains a putative metal-binding site; protein abundance increases in response to DNA replication stress"
126,YDR540C,68.17218073,1.789141422,0.221446593,7.999540853,1.25E-15,7.65E-15,S000002948,IRC4,540,Verified,chrIV,1517136,1517675,-1,Protein of unknown function; null mutant displays increased levels of spontaneous Rad52p foci; green fluorescent protein (GFP)-fusion protein localizes to the cytoplasm and nucleus
127,YEL005C,121.7296505,1.14916021,0.171789236,6.672527955,2.51E-11,1.12E-10,S000000731,VAB2,849,Verified,chrV,145907,146755,-1,"Subunit of the BLOC-1 complex involved in endosomal maturation; interacts with Vps21p-GFP; has potential role in vacuolar function, as suggested by its ability to bind Vac8p; likely member of; Vab2p-GFP-fusion localizes to cytoplasm in punctate pattern"
128,YEL041W,136.0338986,1.441734426,0.154540281,9.296708927,1.45E-20,1.15E-19,S000000767,YEF1,1488,Verified,chrV,75944,77431,1,"ATP-NADH kinase; phosphorylates both NAD and NADH; homooctameric structure consisting of 60-kDa subunits; similar to Pos5p; overexpression complements certain pos5 phenotypes; YEF1 has a paralog, UTR1, that arose from the whole genome duplication"
129,YEL047C,2604.716828,1.039687649,0.118278394,8.790128043,1.49E-18,1.08E-17,S000000773,FRD1,1413,Verified,chrV,65385,66797,-1,"Soluble fumarate reductase; required with isoenzyme Osm1p for anaerobic growth; may interact with ribosomes, based on co-purification experiments; authentic, non-tagged protein is detected in purified mitochondria in high-throughput studies; similar to Arxula adeninovorans fumarate reductase; protein abundance increases in response to DNA replication stress; FRD1 has a paralog, OSM1, that arose from the whole genome duplication"
130,YEL057C,33.1233593,1.022612809,0.255359846,3.980491836,6.88E-05,0.000160651,S000000783,SDD1,702,Verified,chrV,45020,45721,-1,Protein of unknown function; overproduction suppresses lethality due to expression of the dominant PET9 allele AAC2-A128P; may have a role in telomere maintenance; target of UME6 regulation
131,YEL071W,4097.053942,1.767202209,0.149038387,11.85099364,2.13E-32,3.00E-31,S000000797,DLD3,1491,Verified,chrV,16355,17845,1,"2-hydroxyglutarate transhydrogenase, and minor D-lactate dehydrogenase; converts D-2-hydroxyglutarate (D-2HG), an oncometabolite, to alpha-ketoglutarate in the presence of FAD, with concomitant reduction of pyruvate to D-lactate; minor lactate dehydrogenase activity; component of the retrograde regulon that consists of genes whose expression are stimulated by damage to mitochondria and reduced in cells grown with glutamate as the sole nitrogen source; located in the cytoplasm"
132,YEL073C,188.1386329,1.468508739,0.196541116,7.469875996,8.03E-14,4.33E-13,S000000799,YEL073C,324,Uncharacterized,chrV,7230,7553,-1,Putative protein of unknown function; located adjacent to ARS503 and the telomere on the left arm of chromosome V; regulated by inositol/choline
133,YER024W,1065.905293,3.372616586,0.354712872,9.478448694,2.58E-21,2.12E-20,S000000826,YAT2,2772,Verified,chrV,202192,204963,1,"Carnitine acetyltransferase; has similarity to Yat1p, which is a carnitine acetyltransferase associated with the mitochondrial outer membrane"
134,YER037W,387.3059506,1.461989599,0.11485577,12.71491891,4.89E-37,8.06E-36,S000000839,PHM8,966,Verified,chrV,225889,226854,1,"Lysophosphatidic acid (LPA) phosphatase, nucleotidase; principle and physiological nucleotidase working on GMP, UMP and CMP; involved in LPA hydrolysis in response to phosphate starvation and ribose salvage pathway; phosphatase activity is soluble and Mg2+ dependent; expression is induced by low phosphate levels and by inactivation of Pho85p; repressed by Gcn4p under normal conditions; PHM8 has a paralog, SDT1, that arose from the whole genome duplication"
135,YER039C,85.09543216,1.521423218,0.220483982,6.865017995,6.65E-12,3.11E-11,S000000841,HVG1,750,Verified,chrV,228456,229205,-1,"Protein of unknown function; HVG1 has a paralog, VRG4, that arose from the whole genome duplication"
136,YER039C-A,22.78009132,1.502669841,0.311774493,4.709781225,2.48E-06,6.80E-06,S000007226,YER039C-A,219,Uncharacterized,chrV,229263,229481,-1,Putative protein of unknown function; YER039C-A is not an essential gene
137,YER040W,551.1393505,1.267278224,0.132750923,9.542783337,1.39E-21,1.16E-20,S000000842,GLN3,2193,Verified,chrV,229795,231987,1,Transcriptional activator of genes regulated by nitrogen catabolite repression; localization and activity regulated by quality of nitrogen source and Ure2p
138,YER052C,4337.319937,1.508594484,0.094061944,16.03790308,6.95E-58,2.23E-56,S000000854,HOM3,1584,Verified,chrV,256375,257958,-1,Aspartate kinase (L-aspartate 4-P-transferase); cytoplasmic enzyme that catalyzes the first step in the common pathway for methionine and threonine biosynthesis; expression regulated by Gcn4p and the general control of amino acid synthesis
139,YER053C,691.8427593,2.073790081,0.126125987,16.42399411,1.29E-60,4.60E-59,S000000855,PIC2,903,Verified,chrV,258737,259639,-1,Mitochondrial copper and phosphate carrier; imports copper and inorganic phosphate into mitochondria; functionally redundant with Mir1p but less abundant than Mir1p under normal conditions; expression is induced at high temperature
140,YER053C-A,45.806298,1.994929208,0.284924746,6.774906011,1.24E-11,5.67E-11,S000007523,YER053C-A,114,Verified,chrV,260933,261046,-1,Protein of unknown function; green fluorescent protein (GFP)-fusion protein localizes to the endoplasmic reticulum; protein abundance increases in response to DNA replication stress
141,YER054C,97.20111078,1.097972282,0.180376498,6.072809211,1.26E-09,4.84E-09,S000000856,GIP2,1647,Verified,chrV,262052,263698,-1,"Putative regulatory subunit of protein phosphatase Glc7p; involved in glycogen metabolism; contains a conserved motif (GVNK motif) that is also found in Gac1p, Pig1p, and Pig2p; GIP2 has a paralog, PIG2, that arose from the whole genome duplication"
142,YER055C,3520.075498,1.046833069,0.069390432,15.08503046,2.03E-51,5.36E-50,S000000857,HIS1,894,Verified,chrV,264892,265785,-1,"ATP phosphoribosyltransferase; a hexameric enzyme, catalyzes the first step in histidine biosynthesis; mutations cause histidine auxotrophy and sensitivity to Cu, Co, and Ni salts; transcription is regulated by general amino acid control"
143,YER061C,365.3511723,1.207961578,0.104319456,11.57325368,5.63E-31,7.41E-30,S000000863,CEM1,1329,Verified,chrV,278298,279626,-1,Mitochondrial beta-keto-acyl synthase; possible role in fatty acid synthesis; required for mitochondrial respiration; human homolog OXSM can complement yeast cem1 null mutant
144,YER066C-A,47.36062866,1.588752746,0.243945073,6.435026293,1.23E-10,5.15E-10,S000002959,YER066C-A,501,Dubious,chrV,291703,292203,-1,"Dubious open reading frame; unlikely to encode a functional protein, based on available experimental and comparative sequence data; partially overlaps uncharacterized ORF YER067W"
145,YER067W,93.94666096,1.295877047,0.196915958,6.551924308,5.68E-11,2.45E-10,S000000869,RGI1,486,Verified,chrV,292066,292551,1,"Protein of unknown function; involved in energy metabolism under respiratory conditions; protein abundance is increased upon intracellular iron depletion or in response to DNA replication stress; RGI1 has a paralog, RGI2, that arose from the whole genome duplication"
146,YER068C-A,202.4338291,4.276332297,0.27668351,14.77084098,2.26E-49,5.63E-48,S000028749,YER068C-A,432,Dubious,chrV,295301,295732,-1,"Dubious open reading frame; unlikely to encode a functional protein, based on available experimental and comparative sequence data; overlaps ORF ARG5,6/YER069W"
147,YER069W,4634.359405,3.659983027,0.199858153,18.30958777,6.94E-75,3.65E-73,S000000871,"ARG5,6",2592,Verified,chrV,295410,298001,1,"Acetylglutamate kinase and N-acetyl-gamma-glutamyl-phosphate reductase; N-acetyl-L-glutamate kinase (NAGK) catalyzes the 2nd and N-acetyl-gamma-glutamyl-phosphate reductase (NAGSA), the 3rd step in arginine biosynthesis; synthesized as a precursor which is processed in the mitochondrion to yield mature NAGK and NAGSA; enzymes form a metabolon complex with Arg2p; NAGK C-terminal domain stabilizes the enzymes, slows catalysis and is involved in feed-back inhibition by arginine"
148,YER071C,165.4073144,1.286868192,0.138706477,9.256284455,2.12E-20,1.68E-19,S000000873,TDA2,381,Verified,chrV,301947,302327,-1,Subunit of a complex that associates with actin filaments; forms a complex with Aim21p that inhibits barbed end F-actin assembly; elevates actin monomer pools to increase endocytotic efficiency and to regulate the distribution of actin between cables and patches; Aim21p/Tda2p forms a larger complex with actin capping proteins Cap1p and Cap2p; TcTex1-type dynein light chain family member; null mutant is sensitive to expression of the top1-T722A allele
149,YER078C,445.3577653,1.292102078,0.14513046,8.895532919,5.81E-19,4.31E-18,S000000880,ICP55,1536,Verified,chrV,316807,318342,-1,"Mitochondrial aminopeptidase; cleaves the N termini of at least 38 imported proteins after cleavage by the mitochondrial processing peptidase (MPP), thereby increasing their stability; member of the aminopeptidase P family"
150,YER079W,248.5788791,1.888661529,0.121301096,15.52193133,2.47E-54,7.20E-53,S000000881,YER079W,633,Uncharacterized,chrV,318920,319552,1,Putative protein of unknown function
151,YER090W,3019.782443,1.464347643,0.084963155,17.23368482,1.48E-66,6.14E-65,S000000892,TRP2,1524,Verified,chrV,337949,339472,1,"Anthranilate synthase; catalyzes the initial step of tryptophan biosynthesis, forms multifunctional hetero-oligomeric anthranilate synthase:indole-3-glycerol phosphate synthase enzyme complex with Trp3p"
152,YER096W,189.6261602,1.497729701,0.194075958,7.7048584,1.31E-14,7.45E-14,S000000898,SHC1,1539,Verified,chrV,351698,353236,1,"Sporulation-specific activator of Chs3p (chitin synthase III); required for the synthesis of the chitosan layer of ascospores; transcriptionally induced at alkaline pH; SHC1 has a paralog, SKT5, that arose from the whole genome duplication"
153,YER121W,23.37234418,1.097557573,0.280195041,3.862398356,0.000112279,0.000256193,S000000923,YER121W,345,Uncharacterized,chrV,402375,402719,1,Putative protein of unknown function; may be involved in phosphatase regulation and/or generation of precursor metabolites and energy
154,YER133W-A,82.74140313,1.084379674,0.211501067,5.109352222,3.23E-07,9.75E-07,S000028756,YER133W-A,342,Dubious,chrV,437191,437532,1,"Dubious open reading frame; unlikely to encode a functional protein, based on available experimental and comparative sequence data; partially overlaps ORF YER134C"
155,YER175C,2073.932665,4.811163639,0.194745116,24.62730099,6.44E-134,2.24E-131,S000000977,TMT1,900,Verified,chrV,539464,540363,-1,"Trans-aconitate methyltransferase; cytosolic enzyme that catalyzes the methyl esterification of 3-isopropylmalate, an intermediate of the leucine biosynthetic pathway, and trans-aconitate, which inhibits the citric acid cycle"
156,YER175W-A,31.98859373,1.601923674,0.268749617,5.861416272,4.59E-09,1.65E-08,S000028625,YER175W-A,165,Uncharacterized,chrV,540650,540814,1,"Putative protein of unknown function; identified by gene-trapping, microarray-based expression analysis, and genome-wide homology searching"
157,YER176W,937.5307874,1.005629047,0.184317473,5.455019881,4.90E-08,1.60E-07,S000000978,ECM32,3366,Verified,chrV,541690,545055,1,"DNA dependent ATPase/DNA helicase; helicase belonging to the Dna2p- and Nam7p-like family of helicases that is involved in modulating translation termination; interacts with the translation termination factors, localized to polysomes"
158,YER184C,252.5060298,1.198112862,0.195237604,6.132809284,8.63E-10,3.37E-09,S000000986,TOG1,2385,Verified,chrV,556296,558680,-1,"Transcriptional activator of oleate genes; regulates genes involved in fatty acid utilization; zinc cluster protein; deletion confers sensitivity to Calcufluor white, and prevents growth on glycerol or lactate as sole carbon source"
159,YER185W,89.81129764,1.584474793,0.319340197,4.976118592,6.49E-07,1.90E-06,S000000987,PUG1,912,Verified,chrV,559454,560365,1,Plasma membrane protein involved in protoprophyrin and heme transport; roles in the uptake of protoprophyrin IX and the efflux of heme; expression is induced under both low-heme and low-oxygen conditions; member of the fungal lipid-translocating exporter (LTE) family of proteins
160,YER187W,29.1310331,1.327238954,0.283255729,4.599178468,4.24E-06,1.13E-05,S000000989,YER187W,426,Uncharacterized,chrV,566230,566655,1,Putative protein of unknown function; induced in respiratory-deficient cells
161,YER188C-A,15.39283611,1.240869087,0.34768306,3.489920167,0.000483165,0.001008933,S000028764,YER188C-A,300,Uncharacterized,chrV,569608,569907,-1,Putative protein of unknown function
162,YFL019C,23.26646375,2.547511454,0.337600977,6.765502157,1.33E-11,6.04E-11,S000001875,YFL019C,354,Uncharacterized,chrVI,100252,100605,-1,Putative protein of unknown function; conserved across S. cerevisiae strains; YFL019C is not an essential gene
163,YFL020C,28.75398228,1.565757126,0.321418013,4.78919181,1.67E-06,4.69E-06,S000001874,PAU5,369,Verified,chrVI,99231,99599,-1,Member of the seripauperin multigene family; encoded mainly in subtelomeric regions; induced during alcoholic fermentation; induced by low temperature and also by anaerobic conditions; negatively regulated by oxygen and repressed by heme
164,YFL028C,578.9715738,1.856292105,0.144216199,12.86091585,7.47E-38,1.26E-36,S000001866,CAF16,870,Verified,chrVI,79344,80213,-1,Part of evolutionarily-conserved CCR4-NOT regulatory complex; contains single ABC-type ATPase domain but no transmembrane domain; interacts with several subunits of Mediator
165,YFL030W,204.2036496,1.236884532,0.210826839,5.865183654,4.49E-09,1.62E-08,S000001864,AGX1,1158,Verified,chrVI,76831,77988,1,"Alanine:glyoxylate aminotransferase (AGT); catalyzes the synthesis of glycine from glyoxylate, which is one of three pathways for glycine biosynthesis in yeast; similar to mammalian and plant alanine:glyoxylate aminotransferases; human homolog AGXT complements yeast null mutant"
166,YFL041W-A,17.32567503,1.259241593,0.315703199,3.898869401,9.66E-05,0.000222286,S000028547,YFL041W-A,192,Uncharacterized,chrVI,48734,48925,1,Putative protein of unknown function; identified by fungal homology and RT-PCR
167,YFL042C,438.2988307,1.10022903,0.097502066,11.27833496,1.68E-29,2.07E-28,S000001852,LAM5,2025,Verified,chrVI,45720,47744,-1,"Putative sterol transfer protein; one of six StART-like domain-containing proteins in yeast that may be involved in sterol transfer between intracellular membranes; conserved across eukaryotes; has both GRAM and StART-like (VASt) domains; localizes to membrane contact sites throughout the cell, including nucleus-vacuole junctions and ER-mitochondrial contact sites"
168,YFL044C,344.8125395,1.12638968,0.102062513,11.02538587,2.88E-28,3.38E-27,S000001850,OTU1,906,Verified,chrVI,44655,45560,-1,Deubiquitylation enzyme that binds to the chaperone-ATPase Cdc48p; may contribute to regulation of protein degradation by deubiquitylating substrates that have been ubiquitylated by Ufd2p; member of the Ovarian Tumor (OTU) family; protein abundance increases in response to DNA replication stress
169,YFL046W,225.4047249,1.420463295,0.174984238,8.107354304,5.17E-16,3.24E-15,S000001848,FMP32,624,Verified,chrVI,42815,43438,1,"Putative assembly factor for cytochrome c oxidase; the authentic, non-tagged protein is detected in highly purified mitochondria in high-throughput studies; has similarity to human MCUR1/CCDC90A"
170,YFL060C,60.80016914,1.008652471,0.257776502,3.902731864,9.51E-05,0.000219103,S000001834,SNO3,669,Verified,chrVI,10301,10969,-1,Protein of unknown function; nearly identical to Sno2p; expression is induced before the diauxic shift and also in the absence of thiamin
171,YFR003C,169.526453,1.022150948,0.154009425,6.62916013,3.38E-11,1.48E-10,S000001899,YPI1,468,Verified,chrVI,152657,153124,-1,"Regulatory subunit of the type I protein phosphatase (PP1) Glc7p; Glc7p participates in the regulation of a variety of metabolic processes including mitosis and glycogen metabolism; in vitro evidence suggests Ypi1p is an inhibitor of Glc7p while in vivo evidence suggests it is an activator; overproduction causes decreased cellular content of glycogen; partial depletion causes lithium sensitivity, while overproduction confers lithium-tolerance"
172,YFR008W,57.30480185,1.156533275,0.175231493,6.550340019,5.74E-11,2.47E-10,S000001904,FAR7,666,Verified,chrVI,160535,161200,1,"Protein involved in recovery from pheromone-induced cell cycle arrest; acts in a Far1p-independent pathway; interacts with Far3p, Far8p, Far9p, Far10p, and Far11p; protein abundance increases in response to DNA replication stress"
173,YFR023W,25.15083086,1.735169696,0.335826284,4.986202496,6.16E-07,1.81E-06,S000001919,PES4,1836,Verified,chrVI,199874,201709,1,"Poly(A) binding protein, suppressor of DNA polymerase epsilon mutation; PES4 has a paralog, MIP6, that arose from the whole genome duplication"
174,YFR025C,722.2426082,1.525900982,0.124483774,12.25218476,1.64E-34,2.49E-33,S000001921,HIS2,1008,Verified,chrVI,203743,204750,-1,"Histidinolphosphatase; catalyzes the eighth step in histidine biosynthesis; mutations cause histidine auxotrophy and sensitivity to Cu, Co, and Ni salts; transcription is regulated by general amino acid control"
175,YFR046C,91.71732739,1.144139794,0.200726423,5.685458479,1.30E-08,4.52E-08,S000001942,CNN1,1086,Verified,chrVI,243074,244159,-1,"Kinetochore protein; associated with the essential kinetochore proteins Nnf1p and Spc24p; phosphorylated by Clb5-Cdk1, Mps1p, Ipl1p and to a lesser extent by Clb2-Cdk1; localizes to the lower region of the Ndc80 complex during anaphase and regulates KMN activity by inhibiting the Mtw1 and Spc105 complexes from binding to the Ndc80 complex; similar to metazoan CENP-T"
176,YFR047C,1682.741902,1.043805023,0.098410119,10.60821449,2.73E-26,2.92E-25,S000001943,BNA6,888,Verified,chrVI,244279,245166,-1,Quinolinate phosphoribosyl transferase; required for the de novo biosynthesis of NAD from tryptophan via kynurenine; expression regulated by Hst1p
177,YFR049W,274.5538344,1.062116246,0.097913132,10.83566047,2.33E-27,2.64E-26,S000001945,YMR31,372,Verified,chrVI,248523,248894,1,"Subunit of the mitochondrial alpha-ketoglutarate dehydrogenase; recruits E3 subunit (Lpd1p) to the E1-E2 (Kgd1p, Kgd2p) core; has similarity to human mitochondrial ribosomal protein MRP-S36"
178,YFR054C,29.10422172,1.369426486,0.312445921,4.321880545,1.55E-05,3.88E-05,S000001950,YFR054C,579,Uncharacterized,chrVI,258855,259433,-1,Putative protein of unknown function; conserved among S. cerevisiae strains
179,YGL026C,9175.093415,1.22553782,0.105545878,11.61183309,3.59E-31,4.75E-30,S000002994,TRP5,2124,Verified,chrVII,446412,448535,-1,Tryptophan synthase; catalyzes the last step of tryptophan biosynthesis; regulated by the general control system of amino acid biosynthesis
180,YGL032C,1030.034772,1.469243034,0.122337281,12.00497921,3.35E-33,4.81E-32,S000003000,AGA2,264,Verified,chrVII,436570,436833,-1,"Adhesion subunit of a-agglutinin of a-cells; C-terminal sequence acts as a ligand for alpha-agglutinin (Sag1p) during agglutination, modified with O-linked oligomannosyl chains, linked to anchorage subunit Aga1p via two disulfide bonds"
181,YGL047W,117.9481315,1.116863304,0.145197242,7.667908429,1.75E-14,9.87E-14,S000003015,ALG13,609,Verified,chrVII,411552,412160,1,Catalytic component of UDP-GlcNAc transferase; required for the second step of dolichyl-linked oligosaccharide synthesis; anchored to the ER membrane via interaction with Alg14p; similar to bacterial and human glycosyltransferases; protein abundance increases in response to DNA replication stress; both human homologs ALG13 and ALG14 are required to complement yeast alg13 mutant
182,YGL053W,290.1384087,1.072754932,0.108279809,9.89844078,4.23E-23,3.84E-22,S000003021,PRM8,714,Verified,chrVII,402589,403302,1,"Pheromone-regulated protein; contains with 2 predicted transmembrane segments and an FF sequence, a motif involved in COPII binding; forms a complex with Prp9p in the ER; member of DUP240 gene family; PRM8 has a paralog, PRM9, that arose from a segmental duplication"
183,YGL059W,466.8456818,2.408343453,0.192825677,12.46710043,1.13E-35,1.77E-34,S000003027,PKP2,1476,Verified,chrVII,392223,393698,1,Mitochondrial protein kinase; negatively regulates activity of the pyruvate dehydrogenase complex by phosphorylating the ser-133 residue of the Pda1p subunit; acts in concert with kinase Pkp1p and phosphatases Ptc5p and Ptc6p; relocalizes from mitochondrion to cytoplasm upon DNA replication stress
184,YGL062W,1979.105091,1.442129356,0.135510232,10.63795758,1.98E-26,2.14E-25,S000003030,PYC1,3537,Verified,chrVII,385196,388732,1,"Pyruvate carboxylase isoform; cytoplasmic enzyme that converts pyruvate to oxaloacetate; differentially regulated than isoform Pyc2p; mutations in the human homolog are associated with lactic acidosis; PYC1 has a paralog, PYC2, that arose from the whole genome duplication"
185,YGL096W,105.1581163,1.007710179,0.166180753,6.047206575,1.47E-09,5.63E-09,S000003064,TOS8,831,Verified,chrVII,325331,326161,1,"Homeodomain-containing protein and putative transcription factor; found associated with chromatin; target of SBF transcription factor; induced during meiosis and under cell-damaging conditions; TOS8 has a paralog, CUP9, that arose from the whole genome duplication"
186,YGL104C,432.65958,1.71385955,0.152124698,11.25536723,2.18E-29,2.68E-28,S000003072,VPS73,1461,Verified,chrVII,308713,310173,-1,"Mitochondrial protein; mutation affects vacuolar protein sorting; putative transporter; member of the sugar porter family; VPS73 has a paralog, YBR241C, that arose from the whole genome duplication"
187,YGL117W,1211.777363,5.527491196,0.245750154,22.29132287,4.49E-110,8.01E-108,S000003085,YGL117W,798,Uncharacterized,chrVII,288512,289309,1,Putative protein of unknown function
188,YGL121C,294.7078505,2.71542047,0.186260071,14.45513699,2.33E-47,5.47E-46,S000003089,GPG1,381,Verified,chrVII,280777,281157,-1,Proposed gamma subunit of the heterotrimeric G protein; interacts with the receptor Gpr1p; involved in regulation of pseudohyphal growth; requires Gpb1p or Gpb2p to interact with Gpa2p; overproduction causes prion curing
189,YGL125W,1504.662155,1.418296095,0.111034142,12.77721418,2.20E-37,3.67E-36,S000003093,MET13,1803,Verified,chrVII,272520,274322,1,"Major isozyme of methylenetetrahydrofolate reductase; catalyzes the reduction of 5,10-methylenetetrahydrofolate to 5-methyltetrahydrofolate in the methionine biosynthesis pathway"
190,YGL141W,656.428328,1.055163479,0.074165021,14.22159127,6.73E-46,1.51E-44,S000003109,HUL5,2733,Verified,chrVII,238353,241085,1,"Multiubiquitin chain assembly factor (E4); proteasome processivity factor that elongates polyUb chains on substrates, opposing Ubp6p, a branched polyubiquitin protease; required for retrograde transport of misfolded proteins during ERAD; required for ubiquitination of a subset of cytosolic misfolded proteins upon heat shock"
191,YGL146C,105.6847849,1.021939602,0.181334915,5.633637104,1.76E-08,6.02E-08,S000003114,RRT6,936,Uncharacterized,chrVII,228751,229686,-1,"Putative protein of unknown function; non-essential gene identified in a screen for mutants with increased levels of rDNA transcription; contains two putative transmembrane spans, but no significant homology to other known proteins"
192,YGL154C,231.6296403,1.56839403,0.199377475,7.853421742,4.05E-15,2.39E-14,S000003122,LYS5,819,Verified,chrVII,215278,216096,-1,Phosphopantetheinyl transferase involved in lysine biosynthesis; converts inactive apo-form of Lys2p (alpha-aminoadipate reductase) into catalytically active holo-form by posttranslational addition of phosphopantetheine
193,YGL156W,719.3527947,1.100937536,0.095799265,11.49173316,1.45E-30,1.87E-29,S000003124,AMS1,3252,Verified,chrVII,210416,213667,1,Vacuolar alpha mannosidase; involved in free oligosaccharide (fOS) degradation; delivered to the vacuole in a novel pathway separate from the secretory pathway
194,YGL157W,781.2070747,1.331783028,0.087691981,15.17993967,4.80E-52,1.29E-50,S000003125,ARI1,1044,Verified,chrVII,209006,210049,1,NADPH-dependent aldehyde reductase; utilizes aromatic and alophatic aldehyde substrates; member of the short-chain dehydrogenase/reductase superfamily
195,YGL180W,432.6395371,1.462348025,0.154895777,9.435048412,3.91E-21,3.18E-20,S000003148,ATG1,2694,Verified,chrVII,160065,162758,1,Protein serine/threonine kinase; required for vesicle formation in autophagy and the cytoplasm-to-vacuole targeting (Cvt) pathway; structurally required for phagophore assembly site formation; during autophagy forms a complex with Atg13p and Atg17p; essential for cell cycle progression from G2/M to G1 under nitrogen starvation
196,YGL184C,286.66095,1.760768535,0.21535305,8.163089373,3.27E-16,2.07E-15,S000003152,STR3,1398,Verified,chrVII,154615,156012,-1,Peroxisomal cystathionine beta-lyase; converts cystathionine into homocysteine; may be redox regulated by Gto1p; involved in the release of the aromatic thiol 3-mercaptohexanol during wine fermentation
197,YGL186C,1731.555974,1.087698131,0.107321676,10.13537723,3.85E-24,3.66E-23,S000003154,TPN1,1740,Verified,chrVII,151037,152776,-1,"Plasma membrane pyridoxine (vitamin B6) transporter; member of the purine-cytosine permease subfamily within the major facilitator superfamily; proton symporter with similarity to Fcy21p, Fcy2p, and Fcy22p"
198,YGL194C-A,139.2423947,1.747730527,0.146741506,11.850127,2.15E-32,3.03E-31,S000087160,YGL194C-A,243,Uncharacterized,chrVII,139719,139961,-1,Putative protein of unknown function; identified based on comparisons of the genome sequences of six Saccharomyces species; SWAT-GFP and mCherry fusion proteins localize to the endoplasmic reticulum
199,YGL219C,490.0496991,1.078525874,0.103289912,10.43693147,1.68E-25,1.71E-24,S000003187,MDM34,1380,Verified,chrVII,82878,84257,-1,Mitochondrial component of the ERMES complex; links the ER to mitochondria and may promote inter-organellar calcium and phospholipid exchange as well as coordinating mitochondrial DNA replication and growth; required for mitophagy; ERMES complex is often co-localized with peroxisomes and with concentrated areas of pyruvate dehydrogenase
200,YGL223C,507.3042355,1.400431926,0.13491544,10.37297612,3.29E-25,3.29E-24,S000003191,COG1,1254,Verified,chrVII,79112,80365,-1,Essential component of the conserved oligomeric Golgi complex; a cytosolic tethering complex (Cog1p through Cog8p) that functions in protein trafficking to mediate fusion of transport vesicles to Golgi compartments
201,YGL224C,621.0344963,1.730586632,0.159862069,10.81764371,2.84E-27,3.19E-26,S000003192,SDT1,843,Verified,chrVII,78015,78857,-1,"Pyrimidine nucleotidase; responsible for production of nicotinamide riboside and nicotinic acid riboside; overexpression suppresses the 6-AU sensitivity of transcription elongation factor S-II, as well as resistance to other pyrimidine derivatives; SDT1 has a paralog, PHM8, that arose from the whole genome duplication"
202,YGL229C,463.1643194,1.243621701,0.086322752,14.39458439,5.60E-47,1.30E-45,S000003198,SAP4,2457,Verified,chrVII,64503,66959,-1,"Protein required for function of the Sit4p protein phosphatase; member of a family of similar proteins that form complexes with Sit4p, including Sap155p, Sap185p, and Sap190p; SAP4 has a paralog, SAP155, that arose from the whole genome duplication"
203,YGL248W,476.5345916,1.518533189,0.134025037,11.32137378,1.03E-29,1.28E-28,S000003217,PDE1,1110,Verified,chrVII,35653,36762,1,"Low-affinity cyclic AMP phosphodiesterase; controls glucose and intracellular acidification-induced cAMP signaling, target of the cAMP-protein kinase A (PKA) pathway; glucose induces transcription and inhibits translation"
204,YGL249W,110.2013087,1.14988276,0.180252434,6.36410949,1.96E-10,8.00E-10,S000003218,ZIP2,2115,Verified,chrVII,33098,35212,1,Meiosis-specific protein; involved in normal synaptonemal complex formation and pairing between homologous chromosomes during meiosis; relocalizes from mitochondrion to cytoplasm upon DNA replication stress
205,YGL258W,37.49128112,1.058132125,0.294552192,3.588582051,0.000332481,0.000711874,S000003227,VEL1,621,Verified,chrVII,11110,11730,1,"Protein of unknown function; highly induced in zinc-depleted conditions and has increased expression in NAP1 deletion mutants; VEL1 has a paralog, YOR387C, that arose from a single-locus duplication"
206,YGL258W-A,24.87135973,2.64435555,0.357687476,6.801811173,1.03E-11,4.74E-11,S000007607,YGL258W-A,234,Uncharacterized,chrVII,9162,9395,1,Putative protein of unknown function
207,YGL259W,48.21683002,2.51956171,0.291533987,8.36610039,5.96E-17,3.92E-16,S000003228,YPS5,498,Uncharacterized,chrVII,8470,8967,1,Protein with similarity to GPI-anchored aspartic proteases; such proteases are Yap1p and Yap3p; mCherry fusion protein localizes to the vacuole
208,YGR008C,374.1957338,1.308400422,0.179440587,7.289617119,3.11E-13,1.59E-12,S000003240,STF2,255,Verified,chrVII,508110,508364,-1,"Protein involved in resistance to desiccation stress; Stf2p exhibits antioxidant properties, and its overexpression prevents ROS accumulation and apoptosis; binds to F0 sector of mitochondrial F1F0 ATPase in vitro and may modulate the inhibitory action of Inh1p and Stf1p; protein abundance increases in response to DNA replication stress; STF2 has a paralog, TMA10, that arose from the whole genome duplication"
209,YGR016W,55.4537192,1.147845173,0.209003528,5.456797774,4.85E-08,1.58E-07,S000003248,YGR016W,573,Uncharacterized,chrVII,522261,522833,1,Putative protein of unknown function
210,YGR019W,1305.880429,1.399220813,0.087209888,16.04242973,6.46E-58,2.08E-56,S000003251,UGA1,1416,Verified,chrVII,525229,526644,1,Gamma-aminobutyrate (GABA) transaminase; also known as 4-aminobutyrate aminotransferase; involved in the 4-aminobutyrate and glutamate degradation pathways; required for normal oxidative stress tolerance and nitrogen utilization; protein abundance increases in response to DNA replication stress
211,YGR035C,383.078339,2.953130354,0.1263568,23.27301192,8.32E-120,1.73E-117,S000003267,YGR035C,351,Uncharacterized,chrVII,557072,557422,-1,"Putative protein of unknown function, potential Cdc28p substrate; transcription is activated by paralogous transcription factors Yrm1p and Yrr1p along with genes involved in multidrug resistance; YGR035C has a paralog, YLR346C, that arose from the whole genome duplication"
212,YGR043C,120.3504973,1.987780113,0.193732786,10.17596579,2.54E-24,2.43E-23,S000003275,NQM1,1002,Verified,chrVII,580435,581436,-1,"Transaldolase of unknown function; transcription is repressed by Mot1p and induced by alpha-factor and during diauxic shift; NQM1 has a paralog, TAL1, that arose from the whole genome duplication"
213,YGR051C,29.1486949,1.173353385,0.250658055,4.619484887,3.85E-06,1.03E-05,S000003283,YGR051C,324,Dubious,chrVII,592906,593229,-1,"Dubious open reading frame; unlikely to encode a functional protein, based on available experimental and comparative sequence data; YGR051C is not an essential gene"
214,YGR066C,106.6140613,1.010532154,0.224960116,4.533602937,5.80E-06,1.53E-05,S000003298,YGR066C,879,Uncharacterized,chrVII,620921,621799,-1,Putative protein of unknown function
215,YGR070W,395.9926487,1.413998547,0.094139744,15.00300637,7.02E-51,1.84E-49,S000003302,ROM1,3468,Verified,chrVII,627806,631273,1,"Guanine nucleotide exchange factor (GEF) for Rho1p; mutations are synthetically lethal with mutations in rom2, which also encodes a GEP; ROM1 has a paralog, ROM2, that arose from the whole genome duplication"
216,YGR087C,64.41085531,2.228735661,0.276249737,7.860094262,3.84E-15,2.27E-14,S000003319,PDC6,1692,Verified,chrVII,651290,652981,-1,"Minor isoform of pyruvate decarboxylase; decarboxylates pyruvate to acetaldehyde, involved in amino acid catabolism; transcription is glucose- and ethanol-dependent, and is strongly induced during sulfur limitation"
217,YGR088W,215.7432514,1.166752623,0.185439171,6.290172933,3.17E-10,1.27E-09,S000003320,CTT1,1689,Verified,chrVII,654634,656322,1,Cytosolic catalase T; has a role in protection from oxidative damage by hydrogen peroxide
218,YGR110W,236.7657712,1.523778298,0.193502151,7.868878902,3.58E-15,2.12E-14,S000003342,CLD1,1338,Verified,chrVII,713709,715046,1,Mitochondrial cardiolipin-specific phospholipase; functions upstream of Taz1p to generate monolyso-cardiolipin; transcription increases upon genotoxic stress; involved in restricting Ty1 transposition; has homology to mammalian CGI-58
219,YGR131W,60.25920701,1.0724124,0.221364188,4.833756719,1.34E-06,3.79E-06,S000003363,FHN1,525,Verified,chrVII,754726,755250,1,"Protein of unknown function; induced by ketoconazole; promoter region contains sterol regulatory element motif, which has been identified as a Upc2p-binding site; overexpression complements function of Nce102p in NCE102 deletion strain; FHN1 has a paralog, NCE102, that arose from the whole genome duplication"
220,YGR154C,137.3425556,1.313302651,0.181593131,7.216967028,5.32E-13,2.67E-12,S000003386,GTO1,1071,Verified,chrVII,796798,797868,-1,Omega-class glutathione transferase; induced under oxidative stress; putative peroxisomal localization
221,YGR161C,794.8168901,2.897040026,0.157976657,18.30725585,7.24E-75,3.77E-73,S000003393,RTS3,792,Uncharacterized,chrVII,808629,809420,-1,Putative component of the protein phosphatase type 2A complex
222,YGR161W-C,127.2739677,1.778459428,0.162771547,10.86639038,1.67E-27,1.90E-26,S000029726,YGR161W-C,279,Uncharacterized,chrVII,810227,810505,1,Putative protein of unknown function; identified by sequence comparison with hemiascomycetous yeast species
223,YGR194C,367.5804212,1.031344813,0.099936321,10.31083931,6.29E-25,6.17E-24,S000003426,XKS1,1803,Verified,chrVII,886073,887875,-1,Xylulokinase; converts D-xylulose and ATP to xylulose 5-phosphate and ADP; rate limiting step in fermentation of xylulose; required for xylose fermentation by recombinant S. cerevisiae strains
224,YGR197C,408.6615781,1.301592115,0.186076659,6.994035432,2.67E-12,1.28E-11,S000003429,SNG1,1644,Verified,chrVII,892497,894140,-1,"Protein involved in resistance to nitrosoguanidine and 6-azauracil; expression is regulated by transcription factors involved in multidrug resistance; SNG1 has a paralog, YJR015W, that arose from the whole genome duplication"
225,YGR201C,227.4841508,1.0356564,0.162260081,6.380790251,1.76E-10,7.20E-10,S000003433,YGR201C,678,Uncharacterized,chrVII,902520,903197,-1,Putative protein of unknown function
226,YGR213C,99.65918306,1.239204094,0.242161859,5.107026582,3.27E-07,9.87E-07,S000003445,RTA1,954,Verified,chrVII,918512,919465,-1,"Protein involved in 7-aminocholesterol resistance; has seven potential membrane-spanning regions; expression is induced under both low-heme and low-oxygen conditions; member of the fungal lipid-translocating exporter (LTE) family of protein; RTA1 has a paralog, YLR046C, that arose from the whole genome duplication"
227,YGR239C,285.5718796,1.302038372,0.151054856,8.613206292,7.10E-18,4.91E-17,S000003471,PEX21,867,Verified,chrVII,969187,970053,-1,Peroxin required for peroxisomal matrix protein targeting; acts on proteins containing the PTS2 targeting sequence; interacts with Pex7p; constitutively expressed; partially redundant with Pex18p; required for import of the Gpd1p-Pnc1p heterodimer in which only Gpd1p has a peroxisomal targeting signal; relative distribution to cytoplasmic foci increases upon DNA replication stress
228,YGR240C-A,42.18255949,1.245241224,0.209926287,5.871676124,4.31E-09,1.56E-08,S000028551,YGR240C-A,201,Uncharacterized,chrVII,974577,974777,-1,Putative protein of unknown function; identified by fungal homology and RT-PCR
229,YGR243W,90.31473273,2.78351829,0.248459763,10.97772178,4.89E-28,5.66E-27,S000003475,MPC3,441,Verified,chrVII,977336,977776,1,"Highly conserved subunit of the mitochondrial pyruvate carrier (MPC); expressed during growth on nonfermentable carbon sources, and heterodimerizes with Mpc1p to form the respiratory isoform of MPC; MPC localizes to the mitochondrial inner membrane and mediates pyruvate uptake; MPC3 paralog, MPC2, heterodimerizes with Mpc1p to form the fermentative MPC isoform; protein abundance increases in response to DNA replication stress"
230,YGR248W,172.5963681,1.431515009,0.189015932,7.553065734,4.25E-14,2.34E-13,S000003480,SOL4,768,Verified,chrVII,985972,986739,1,"6-phosphogluconolactonase; protein abundance increases in response to DNA replication stress; SOL4 has a paralog, SOL3, that arose from the whole genome duplication"
231,YGR254W,26105.97409,1.242363236,0.234104187,5.306756394,1.12E-07,3.52E-07,S000003486,ENO1,1314,Verified,chrVII,1000927,1002240,1,"Enolase I, a phosphopyruvate hydratase; catalyzes conversion of 2-phosphoglycerate to phosphoenolpyruvate during glycolysis and the reverse reaction during gluconeogenesis; expression repressed in response to glucose; protein abundance increases in response to DNA replication stress; N-terminally propionylated in vivo; ENO1 has a paralog, ENO2, that arose from the whole genome duplication"
232,YGR256W,161.788491,1.379486261,0.172190273,7.99809549,1.26E-15,7.72E-15,S000003488,GND2,1479,Verified,chrVII,1004624,1006102,1,"6-phosphogluconate dehydrogenase (decarboxylating); catalyzes an NADPH regenerating reaction in the pentose phosphate pathway; required for growth on D-glucono-delta-lactone; GND2 has a paralog, GND1, that arose from the whole genome duplication"
233,YGR259C,67.34540984,2.360707864,0.247232437,9.344050781,9.27E-21,7.44E-20,S000003491,YGR259C,441,Dubious,chrVII,1012481,1012921,-1,"Dubious open reading frame; unlikely to encode a functional protein, based on available experimental and comparative sequence data; overlaps almost completely with the verified ORF TNA1/YGR260W"
234,YGR267C,1215.318284,1.22304477,0.089063792,13.72936085,6.77E-43,1.41E-41,S000003499,FOL2,732,Verified,chrVII,1025004,1025735,-1,"GTP-cyclohydrolase I, catalyzes first step in folic acid biosynthesis; human homolog GCH1 is implicated in dopa-responsive dystonia (DRD), and can complement yeast null mutant"
235,YGR268C,245.5915184,1.036578302,0.128178589,8.079228497,6.52E-16,4.05E-15,S000003500,HUA1,597,Verified,chrVII,1026057,1026653,-1,Cytoplasmic protein containing a zinc finger domain; sequence similarity to that of Type I J-proteins; computational analysis of large-scale protein-protein interaction data suggests a possible role in actin patch assembly
236,YGR281W,10074.70685,3.433046116,0.141776795,24.2083091,1.82E-129,4.74E-127,S000003513,YOR1,4434,Verified,chrVII,1052824,1057257,1,Plasma membrane ATP-binding cassette (ABC) transporter; multidrug transporter mediates export of many different organic anions including oligomycin; homolog of human cystic fibrosis transmembrane receptor (CFTR)
237,YGR288W,258.8586331,1.906768504,0.207171463,9.186720067,4.05E-20,3.16E-19,S000003520,MAL13,1422,Verified,chrVII,1070293,1071714,1,MAL-activator protein; part of complex locus MAL1; nonfunctional in genomic reference strain S288C
238,YHL021C,656.3068519,1.282633438,0.098463023,13.01856428,9.60E-39,1.70E-37,S000001013,AIM17,1398,Verified,chrVIII,64462,65859,-1,"Protein of unknown function; the authentic, non-tagged protein is detected in highly purified mitochondria in high-throughput studies; null mutant displays reduced frequency of mitochondrial genome loss"
239,YHL022C,59.91990416,1.80095296,0.221656318,7.977695683,1.49E-15,9.07E-15,S000001014,SPO11,1197,Verified,chrVIII,62961,64157,-1,Meiosis-specific protein that initiates meiotic recombination; initiates meiotic recombination by catalyzing the formation of double-strand breaks in DNA via a transesterification reaction; required for homologous chromosome pairing and synaptonemal complex formation
240,YHL035C,2374.298263,1.717036005,0.168794251,10.17349087,2.60E-24,2.49E-23,S000001027,VMR1,4779,Verified,chrVIII,27978,32756,-1,"Vacuolar membrane protein; involved in multiple drug resistance and metal sensitivity; ATP-binding cassette (ABC) family member involved in drug transport; potential Cdc28p substrate; induced under respiratory conditions; VMR1 has a paralog, YBT1, that arose from the whole genome duplication"
241,YHL040C,1719.136153,1.028451187,0.197892922,5.199740992,2.00E-07,6.13E-07,S000001032,ARN1,1884,Verified,chrVIII,19088,20971,-1,"ARN family transporter for siderophore-iron chelates; responsible for uptake of iron bound to ferrirubin, ferrirhodin, and related siderophores; protein increases in abundance and relocalizes to the vacuole upon DNA replication stress"
242,YHL042W,48.307975,1.732799627,0.242762764,7.032624805,2.03E-12,9.82E-12,S000001034,YHL042W,453,Uncharacterized,chrVIII,15667,16119,1,"Protein of unknown function; member of the DUP380 subfamily of conserved, often subtelomerically-encoded proteins; SWAT-GFP and mCherry fusion proteins localize to the vacuole"
243,YHL043W,70.35363178,1.483283055,0.197837526,7.441142227,9.98E-14,5.33E-13,S000001035,ECM34,513,Verified,chrVIII,14901,15413,1,"Protein of unknown function; member of the DUP380 subfamily of conserved, often subtelomerically-encoded proteins; SWAT-GFP, seamless-GFP and mCherry C-terminal fusion proteins localize to the cytosol"
244,YHL044W,161.5743883,1.781649643,0.163167963,10.8738678,1.54E-27,1.76E-26,S000001036,YHL044W,708,Uncharacterized,chrVIII,13565,14272,1,Putative integral membrane protein; member of DUP240 gene family; green fluorescent protein (GFP)-fusion protein localizes to the plasma membrane in a punctate pattern
245,YHL045W,8.121027048,1.861603645,0.435495562,3.840629631,0.000122719,0.000278794,S000001037,YHL045W,348,Dubious,chrVIII,12502,12849,1,Putative protein of unknown function; not an essential gene
246,YHL046W-A,204.743701,1.346213441,0.32051598,4.230628746,2.33E-05,5.74E-05,S000028775,YHL046W-A,327,Dubious,chrVIII,9981,10307,1,"Dubious open reading frame; unlikely to encode a functional protein, based on available experimental and comparative sequence data; overlaps ORF ARN2/YHL047C"
247,YHL047C,3265.573371,1.471368023,0.311470133,4.755927268,1.98E-06,5.48E-06,S000001039,ARN2,1863,Verified,chrVIII,8351,10213,-1,Transporter; member of the ARN family of transporters that specifically recognize siderophore-iron chelates; responsible for uptake of iron bound to the siderophore triacetylfusarinine C
248,YHR014W,48.05999454,1.094764893,0.246142303,4.424240762,9.68E-06,2.48E-05,S000001056,SPO13,876,Verified,chrVIII,132047,132922,1,Meiotic regulator; involved in maintaining sister chromatid cohesion during meiosis I as well as promoting proper attachment of kinetochores to the spindle during meiosis I and meiosis II; anaphase-promoting complex (APC) substrate that is degraded during anaphase I; expressed only in meiotic cells
249,YHR018C,7178.679807,4.021759642,0.156540237,25.6823141,1.84E-145,9.60E-143,S000001060,ARG4,1392,Verified,chrVIII,140011,141402,-1,Argininosuccinate lyase; catalyzes the final step in the arginine biosynthesis pathway
250,YHR029C,1818.797494,4.177181669,0.207601186,20.07727072,1.17E-89,9.85E-88,S000001071,YHI9,885,Verified,chrVIII,167677,168561,-1,"Protein of unknown function; null mutant is defective in unfolded protein response; possibly involved in a membrane regulation metabolic pathway; member of the PhzF superfamily, though most likely not involved in phenazine production"
251,YHR044C,109.3607515,1.262229895,0.173865392,7.236575588,4.60E-13,2.32E-12,S000001086,DOG1,741,Verified,chrVIII,194068,194808,-1,"2-deoxyglucose-6-phosphate phosphatase; member of a family of low molecular weight phosphatases; confers 2-deoxyglucose resistance when overexpressed; DOG1 has a paralog, DOG2, that arose from a single-locus duplication; the last half of DOG1 and DOG2 are subject to gene conversions among S. cerevisiae, S. paradoxus, and S. mikatae"
252,YHR071W,2588.31382,2.781388235,0.161025905,17.26568046,8.53E-67,3.55E-65,S000001113,PCL5,690,Verified,chrVIII,237004,237693,1,"Cyclin; interacts with and phosphorylated by Pho85p cyclin-dependent kinase (Cdk), induced by Gcn4p at level of transcription, specifically required for Gcn4p degradation, may be sensor of cellular protein biosynthetic capacity"
253,YHR122W,448.0191063,1.425429075,0.188878686,7.541551058,4.64E-14,2.54E-13,S000001164,CIA2,696,Verified,chrVIII,353625,354320,1,"Component of cytosolic iron-sulfur protein assembly (CIA) machinery; acts at a late step of Fe-S cluster assembly; forms the CIA targeting complex with Cia1p and Met18p that directs Fe-S cluster incorporation and maturation of a subset of proteins involved in methionine biosynthesis, DNA replication and repair, transcription, and telomere maintenance; ortholog of human FAM96B"
254,YHR137W,752.3801268,1.716380261,0.179128798,9.564419495,1.13E-21,9.44E-21,S000001179,ARO9,1542,Verified,chrVIII,375709,377250,1,"Aromatic aminotransferase II; catalyzes the first step of tryptophan, phenylalanine, and tyrosine catabolism"
255,YHR139C,73.15155101,1.655735159,0.238265866,6.892004753,5.50E-12,2.59E-11,S000001181,SPS100,981,Verified,chrVIII,378219,379199,-1,"Protein required for spore wall maturation; expressed during sporulation; may be a component of the spore wall; expression also induced in cells treated with the mycotoxin patulin; SPS100 has a paralog, YGP1, that arose from the whole genome duplication"
256,YHR139C-A,17.92929591,1.515938363,0.349104849,4.21314284,2.52E-05,6.17E-05,S000003533,YHR139C-A,312,Uncharacterized,chrVIII,380108,380419,-1,Putative protein of unknown function; conserved across S. cerevisiae strains
257,YHR140W,473.514634,3.47445489,0.238127745,14.49345747,1.33E-47,3.16E-46,S000001182,YHR140W,720,Uncharacterized,chrVIII,380572,381291,1,Putative integral membrane protein of unknown function
258,YHR161C,885.6729447,1.993491258,0.148626307,13.40412193,5.72E-41,1.10E-39,S000001204,YAP1801,1914,Verified,chrVIII,420373,422286,-1,"Protein of the AP180 family, involved in clathrin cage assembly; binds Pan1p and clathrin; YAP1801 has a paralog, YAP1802, that arose from the whole genome duplication"
259,YHR162W,3214.107504,2.799856353,0.155543177,17.99174234,2.26E-72,1.10E-70,S000001205,MPC2,390,Verified,chrVIII,423072,423461,1,"Highly conserved subunit of the mitochondrial pyruvate carrier (MPC); expressed during growth on fermentable carbon sources, and heterodimerizes with Mpc1p to form the fermentative isoform of MPC; MPC localizes to the mitochondrial inner membrane and mediates pyruvate uptake; MPC2 paralog, MPC3, heterodimerizes with Mpc1p to form the respiratory MPC isoform"
260,YHR180W,84.97876051,1.296264231,0.220988269,5.844853903,5.07E-09,1.82E-08,S000001223,YHR180W,492,Uncharacterized,chrVIII,465178,465669,1,Putative protein of unknown function; conserved among S. cerevisiae strains
261,YHR189W,120.5604647,1.296562011,0.174393623,7.411937531,1.24E-13,6.61E-13,S000001232,PTH1,573,Verified,chrVIII,484028,484600,1,"One of two mitochondrially-localized peptidyl-tRNA hydrolases; dispensable for respiratory growth on rich medium, but required for respiratory growth on minimal medium; see also PTH2"
262,YHR209W,197.6813022,1.009310661,0.133610991,7.548656442,4.40E-14,2.42E-13,S000001252,CRG1,876,Verified,chrVIII,519437,520312,1,S-AdoMet-dependent methyltransferase involved in lipid homeostasis; mediates resistance to a drug cantharidin
263,YHR214W,297.6711883,1.671565923,0.188320745,8.861394972,7.90E-19,5.82E-18,S000001257,YHR214W,612,Uncharacterized,chrVIII,541651,542262,1,"Putative protein of unknown function; predicted to be a glycosylphosphatidylinositol-modified (GPI) protein; YHR214W has a paralog, YAR066W, that arose from a segmental duplication"
264,YHR214W-A,348.0702246,1.474528049,0.167673891,8.782422943,1.60E-18,1.15E-17,S000003535,YHR214W-A,486,Dubious,chrVIII,543008,543493,1,"Dubious open reading frame; induced by zinc deficiency; YHR214W-A has a paralog, YAR068W, that arose from a segmental duplication"
265,YIL007C,122.5060748,1.038568933,0.132215671,7.833456829,4.75E-15,2.79E-14,S000001269,NAS2,663,Verified,chrIX,342994,343656,-1,Evolutionarily conserved 19S regulatory particle assembly-chaperone; involved in assembly of the base subcomplex of the 19S proteasomal regulatory particle (RP); non-essential gene; interacts with Rpn4p; protein abundance increases in response to DNA replication stress; ortholog of human p27
266,YIL028W,33.44570659,1.511303413,0.298443883,4.992760962,5.95E-07,1.75E-06,S000001290,YIL028W,399,Dubious,chrIX,302100,302498,1,"Dubious open reading frame; unlikely to encode a functional protein, based on available experimental and comparative sequence data"
267,YIL029C,58.98368208,1.947530757,0.241476092,7.973149083,1.55E-15,9.40E-15,S000001291,EMA17,429,Uncharacterized,chrIX,300829,301257,-1,"Putative protein of unknown function; deletion confers sensitivity to 4-(N-(S-glutathionylacetyl)amino) phenylarsenoxide (GSAO); YIL029C has a paralog, YPR071W, that arose from a single-locus duplication"
268,YIL045W,178.1522301,1.721649048,0.141154137,12.15232542,5.58E-34,8.38E-33,S000001307,PIG2,1617,Verified,chrIX,271161,272777,1,"Putative type-1 protein phosphatase targeting subunit; tethers Glc7p type-1 protein phosphatase to Gsy2p glycogen synthase; PIG2 has a paralog, GIP2, that arose from the whole genome duplication"
269,YIL056W,2303.47394,2.500172709,0.160025983,15.61618112,5.65E-55,1.71E-53,S000001318,VHR1,1923,Verified,chrIX,249991,251913,1,"Transcriptional activator; required for the vitamin H-responsive element (VHRE) mediated induction of VHT1 (Vitamin H transporter) and BIO5 (biotin biosynthesis intermediate transporter) in response to low biotin concentrations; VHR1 has a paralog, VHR2, that arose from the whole genome duplication"
270,YIL060W,74.38944077,1.103971258,0.221459135,4.97308534,6.59E-07,1.93E-06,S000001322,YIL060W,435,Verified,chrIX,246392,246826,1,Mitochondrial protein of unknown function; required for respiratory growth; mutant accumulates less glycogen than does wild type; null mutation results in a decrease in plasma membrane electron transport; YIL060W is not an essential gene
271,YIL071W-A,30.30154605,1.155578463,0.286269944,3.998048039,6.39E-05,0.000149717,S000028793,YIL071W-A,477,Dubious,chrIX,228550,229026,1,"Dubious open reading frame; unlikely to encode a functional protein, based on available experimental and comparative sequence data; almost completely overlaps ORF PCI8/YIL071C"
272,YIL087C,275.815421,1.517083513,0.144815972,10.46166557,1.30E-25,1.33E-24,S000001349,AIM19,474,Verified,chrIX,199646,200119,-1,Protein of unknown function; mitochondrial protein that physically interacts with Tim23p; null mutant displays reduced respiratory growth
273,YIL089W,70.5559026,1.099133345,0.177639148,6.160168469,7.27E-10,2.85E-09,S000001351,YIL089W,618,Verified,chrIX,195599,196216,1,Protein of unknown function found in the ER and vacuole lumen; overexpression of YIL089W affects endocytic protein trafficking
274,YIL094C,3901.725186,1.310245144,0.077406397,16.92785102,2.80E-64,1.09E-62,S000001356,LYS12,1116,Verified,chrIX,186517,187632,-1,"Homo-isocitrate dehydrogenase; an NAD-linked mitochondrial enzyme required for the fourth step in the biosynthesis of lysine, in which homo-isocitrate is oxidatively decarboxylated to alpha-ketoadipate"
275,YIL097W,131.225666,1.268602484,0.13804566,9.159981221,5.19E-20,4.03E-19,S000001359,FYV10,1551,Verified,chrIX,180427,181977,1,"Subunit of GID complex; involved in proteasome-dependent catabolite inactivation of gluconeogenic enzymes FBPase, PEPCK, and c-MDH; forms dimer with Rmd5p that is then recruited to GID Complex by Gid8p; contains a degenerate RING finger motif needed for GID complex ubiquitin ligase activity in vivo, as well as CTLH and CRA domains; plays role in anti-apoptosis; required for survival upon exposure to K1 killer toxin"
276,YIL099W,84.42205609,1.153791897,0.191151364,6.022790328,1.71E-09,6.50E-09,S000001361,SGA1,1650,Verified,chrIX,178004,179653,1,"Intracellular sporulation-specific glucoamylase; involved in glycogen degradation; induced during starvation of a/a diploids late in sporulation, but dispensable for sporulation"
277,YIL101C,394.6489827,1.21022993,0.137052895,8.834004791,1.01E-18,7.38E-18,S000001363,XBP1,1944,Verified,chrIX,175307,177250,-1,"Transcriptional repressor; binds promoter sequences of cyclin genes, CYS3, and SMF2; not expressed during log phase of growth, but induced by stress or starvation during mitosis, and late in meiosis; represses 15% of all yeast genes as cells transition to quiescence; important for maintaining G1 arrest and for longevity of quiescent cells; member of Swi4p/Mbp1p family; phosphorylated by Cdc28p; relative distribution to nucleus increases upon DNA replication stress"
278,YIL116W,2608.86086,3.404367822,0.1339598,25.39411284,2.93E-142,1.41E-139,S000001378,HIS5,1158,Verified,chrIX,142928,144085,1,"Histidinol-phosphate aminotransferase; catalyzes the seventh step in histidine biosynthesis; responsive to general control of amino acid biosynthesis; mutations cause histidine auxotrophy and sensitivity to Cu, Co, and Ni salts"
279,YIL117C,676.1239745,1.666864593,0.132125183,12.60948466,1.87E-36,3.02E-35,S000001379,PRM5,957,Verified,chrIX,140613,141569,-1,"Pheromone-regulated protein, predicted to have 1 transmembrane segment; induced during cell integrity signaling; PRM5 has a paralog, YNL058C, that arose from the whole genome duplication"
280,YIL152W,162.9201563,1.751766685,0.188164403,9.279177273,1.71E-20,1.36E-19,S000001414,YIL152W,708,Uncharacterized,chrIX,56545,57252,1,Putative protein of unknown function
281,YIL163C,77.36302393,2.250712205,0.304984052,7.296222535,2.96E-13,1.52E-12,S000001425,YIL163C,354,Uncharacterized,chrIX,36899,37252,-1,Protein of unknown function; mRNA identified as translated by ribosome profiling data
282,YIL164C,314.6066188,3.543471858,0.256909743,13.66555,1.63E-42,3.31E-41,S000001426,NIT1,600,Verified,chrIX,34087,34686,-1,"Nitrilase; member of the nitrilase branch of the nitrilase superfamily; in closely related species and other S. cerevisiae strain backgrounds YIL164C and adjacent ORF, YIL165C, likely constitute a single ORF encoding a nitrilase gene"
283,YIL165C,198.4600969,3.344847056,0.273085195,12.08200029,1.31E-33,1.94E-32,S000001427,YIL165C,360,Uncharacterized,chrIX,33718,34077,-1,"Putative protein of unknown function; mutant exhibits mitophagy defects; in closely related species and other S. cerevisiae strain backgrounds YIL165C and adjacent ORF, YIL164C, likely constitute a single ORF encoding a nitrilase gene"
284,YIL166C,171.7773097,1.571597764,0.188733076,8.304293878,1.00E-16,6.54E-16,S000001428,SOA1,1629,Verified,chrIX,30938,32566,-1,"Sulfonate and inorganic sulfur transporter; low affinity sulfate, high affinity sulfite, thiosulfite and major sulfonate transporter; functions as a an H+ symporter; similar to the allantoate permease (Dal5p) subfamily of the major facilitator superfamily; mRNA expression is elevated by sulfur limitation; non-essential gene"
285,YIR005W,62.73788858,1.350619893,0.258105886,5.212135186,1.87E-07,5.76E-07,S000001444,IST3,447,Verified,chrIX,364889,365335,1,Component of the U2 snRNP; required for the first catalytic step of splicing and for spliceosomal assembly; interacts with Rds3p and is required for Mer1p-activated splicing; diploid mutants have a specific defect in MATa1 pre-mRNA splicing which leads to haploid gene expression in diploids
286,YIR017C,199.7518603,3.289673508,0.242621182,13.34749057,1.23E-40,2.35E-39,S000001456,MET28,564,Verified,chrIX,383556,384119,-1,bZIP transcriptional activator in the Cbf1p-Met4p-Met28p complex; participates in the regulation of sulfur metabolism
287,YIR018C-A,51.11070761,1.958171744,0.261931264,7.363914111,1.79E-13,9.32E-13,S000028837,YIR018C-A,138,Uncharacterized,chrIX,385564,385701,-1,Putative protein of unknown function; identified by expression profiling and mass spectrometry
288,YIR018W,228.1799997,2.064118103,0.159886308,12.86503767,7.08E-38,1.20E-36,S000001457,YAP5,738,Verified,chrIX,384609,385346,1,"Basic leucine zipper (bZIP) iron-sensing transcription factor; involved in diauxic shift; YAP5 has a paralog, YAP7, that arose from the whole genome duplication"
289,YIR027C,164.5711507,1.598353742,0.193446698,8.244673758,1.66E-16,1.06E-15,S000001466,DAL1,1383,Verified,chrIX,406260,407642,-1,Allantoinase; converts allantoin to allantoate in the first step of allantoin degradation; expression sensitive to nitrogen catabolite repression
290,YIR034C,3162.253548,2.821096063,0.136537929,20.65581823,8.65E-95,8.45E-93,S000001473,LYS1,1122,Verified,chrIX,419615,420736,-1,"Saccharopine dehydrogenase (NAD+, L-lysine-forming); catalyzes the conversion of saccharopine to L-lysine, which is the final step in the lysine biosynthesis pathway; also has mRNA binding activity"
291,YIR039C,364.7996761,2.186189934,0.157121653,13.87703073,8.73E-44,1.86E-42,S000001478,YPS6,1614,Verified,chrIX,430498,432111,-1,Putative GPI-anchored aspartic protease; member of the yapsin family of proteases involved in cell wall growth and maintenance
292,YIR040C,15.16835978,1.676797201,0.489672112,3.457754947,0.000544697,0.001132505,S000001479,YIR040C,333,Dubious,chrIX,433389,433721,-1,"Dubious open reading frame; unlikely to encode a functional protein, based on available experimental and comparative sequence data"
293,YIR041W,3.732645798,1.934719353,0.513801455,3.793650911,0.000148448,0.000333609,S000001480,PAU15,375,Verified,chrIX,433929,434303,1,Protein of unknown function; member of the seripauperin multigene family encoded mainly in subtelomeric regions; SWAT-GFP and mCherry fusion proteins localize to the vacuole
294,YJL037W,81.5038406,1.399573939,0.238147946,5.857476147,4.70E-09,1.69E-08,S000003574,IRC18,675,Verified,chrX,376662,377336,1,"Protein involved in outer spore wall assembly; possible role in assembly of the dityrosine layer; similar to adjacent ORF, LOH1; irc18 loh1 double mutant exhibits reduced dityrosine fluorescence relative to single mutants; SWAT-GFP fusion protein localizes to the ER and vacuole, while mCherry fusion localizes to the vacuole; expression induced in respiratory-deficient cells and carbon-limited chemostat culture; null mutant displays increased levels of spontaneous Rad52p foci"
295,YJL038C,129.7923074,1.038316923,0.160531343,6.466289918,1.00E-10,4.23E-10,S000003575,LOH1,660,Verified,chrX,375115,375774,-1,"Protein involved in outer spore wall assembly; likely involved directly in dityrosine layer assembly; induced during sporulation; repressed during vegetative growth by Sum1p and Hst1p; sequence similar to adjacent ORF, IRC18/YJL037W, and the irc18 loh1 double mutant exhibits reduced dityrosine fluorescence relative to the single mutants; SWAT-GFP and mCherry fusion proteins localize to the cytosol; proposed role in maintenance of genome integrity"
296,YJL045W,108.4297408,1.050839568,0.182591724,5.748259892,9.02E-09,3.17E-08,S000003581,YJL045W,1905,Verified,chrX,356024,357928,1,"Minor succinate dehydrogenase isozyme; participates in oxidation of succinate and transfer of electrons to ubiquinone; induced during the diauxic shift in a Cat8p-dependent manner; YJL045W has a paralog, SDH1, that arose from the whole genome duplication"
297,YJL052W,12043.90798,1.561847224,0.200568915,7.789685822,6.72E-15,3.92E-14,S000003588,TDH1,999,Verified,chrX,338271,339269,1,"Glyceraldehyde-3-phosphate dehydrogenase (GAPDH), isozyme 1; involved in glycolysis and gluconeogenesis; tetramer that catalyzes the reaction of glyceraldehyde-3-phosphate to 1,3 bis-phosphoglycerate; detected in the cytoplasm and cell wall; protein abundance increases in response to DNA replication stress; GAPDH-derived antimicrobial peptides secreted by S. cerevisiae are active against a wide variety of wine-related yeasts and bateria"
298,YJL057C,236.2434096,1.323550922,0.106113944,12.44767499,1.44E-35,2.24E-34,S000003593,IKS1,2004,Verified,chrX,328118,330121,-1,Protein kinase of unknown cellular role; putative serine/threonine kinase; expression is induced during mild heat stress; deletion mutants are hypersensitive to copper sulphate and resistant to sorbate; interacts with an N-terminal fragment of Sst2p
299,YJL070C,333.3786586,1.155634181,0.106352302,10.85658878,1.86E-27,2.11E-26,S000003606,YJL070C,2667,Uncharacterized,chrX,307971,310637,-1,"Putative metallo-dependent hydrolase superfamily protein; similar to AMP deaminases but lacks key catalytic residues and does not rescue purine nucleotide metabolic defect of quadruple aah1 ade8 amd1 his1 mutant; may regulate purine nucleotide homeostasis as overexpression in an AMD1 strain grown in adenine results in greatly reduced GDP and GTP intracellular levels; not an essential gene; YJL070C has a paralog, YBR284W, that arose from the whole genome duplication"
300,YJL071W,526.9040659,1.91683566,0.177697407,10.7781376,4.37E-27,4.87E-26,S000003607,ARG2,1725,Verified,chrX,306132,307856,1,"Acetylglutamate synthase (glutamate N-acetyltransferase); mitochondrial enzyme that catalyzes the first step in the biosynthesis of the arginine precursor ornithine; forms a complex with Arg5,6p"
301,YJL072C,241.5049816,1.426269241,0.215686176,6.605026917,3.97E-11,1.73E-10,S000003608,PSF2,642,Verified,chrX,305221,305862,-1,"Subunit of the GINS complex (Sld5p, Psf1p, Psf2p, Psf3p); complex is localized to DNA replication origins and implicated in assembly of the DNA replication machinery"
302,YJL082W,1519.249479,2.390275408,0.09738431,24.52876509,7.29E-133,2.28E-130,S000003618,IML2,2196,Verified,chrX,281185,283380,1,"Protein required for clearance of inclusion bodies; localizes to the inclusion bodies formed under protein misfolding stress; the authentic, non-tagged protein is detected in highly purified mitochondria in high-throughput studies; protein abundance increases in response to DNA replication stress; IML2 has a paralog, YKR018C, that arose from the whole genome duplication"
303,YJL088W,1074.663006,4.673077443,0.246165281,18.85016606,2.93E-79,1.76E-77,S000003624,ARG3,1017,Verified,chrX,268799,269815,1,Ornithine carbamoyltransferase; also known as carbamoylphosphate:L-ornithine carbamoyltransferase; catalyzes the biosynthesis of the arginine precursor citrulline
304,YJL089W,183.8817037,3.029523525,0.232074365,12.86207526,7.36E-38,1.25E-36,S000003625,SIP4,2490,Verified,chrX,265926,268415,1,C6 zinc cluster transcriptional activator; binds to the carbon source-responsive element (CSRE) of gluconeogenic genes; involved in the positive regulation of gluconeogenesis; regulated by Snf1p protein kinase; localized to the nucleus
305,YJL106W,88.32369331,1.065767695,0.188398116,5.642745725,1.67E-08,5.73E-08,S000003642,IME2,1938,Verified,chrX,221390,223327,1,"Serine/threonine protein kinase involved in activation of meiosis; associates with Ime1p and mediates its stability, activates Ndt80p; IME2 expression is positively regulated by Ime1p; human CDK2 can complement ime2 null mutant"
306,YJL114W,5.454995351,1.752207149,0.503914499,3.134194528,0.001723266,0.003306232,S000003650,YJL114W,681,,chrX,197915,198595,1,Retrotransposon TYA Gag gene co-transcribed with TYB Pol; translated as TYA or TYA-TYB polyprotein; Gag is a nucleocapsid protein that is the structural constituent of virus-like particles (VLPs); similar to retroviral Gag
307,YJL119C,14.0892201,1.323257885,0.378823623,3.400422879,0.000672817,0.001376457,S000003655,YJL119C,324,Dubious,chrX,191572,191895,-1,"Dubious open reading frame; unlikely to encode a functional protein, based on available experimental and comparative sequence data"
308,YJL127C-B,167.1091822,1.52464098,0.146923947,10.34900287,4.23E-25,4.18E-24,S000028522,MCO6,159,Uncharacterized,chrX,181551,181709,-1,"Putative protein of unknown function; identified based on homology to the filamentous fungus, <i>Ashbya gossypii</i>; SWAT-GFP and seamless-GFP fusion proteins localize to the mitochondria"
309,YJL132W,208.2084245,1.024808717,0.12410796,8.246991929,1.62E-16,1.04E-15,S000003668,YJL132W,2253,Uncharacterized,chrX,161914,164166,1,Putative protein of unknown function; localizes to the membrane fraction; possible Zap1p-regulated target gene induced by zinc deficiency; YJL132W is a non-essential gene
310,YJL133C-A,858.0224172,2.986208659,0.193784403,15.36870769,2.65E-53,7.58E-52,S000028805,DPI8,225,Uncharacterized,chrX,159623,159847,-1,"Putative protein of unknown function; the authentic, non-tagged protein is detected in highly purified mitochondria in high-throughput studies"
311,YJL141C,735.8756048,1.198340571,0.104363363,11.48012132,1.66E-30,2.14E-29,S000003677,YAK1,2424,Verified,chrX,147967,150390,-1,"Serine-threonine protein kinase; component of a glucose-sensing system that inhibits growth in response to glucose availability; upon nutrient deprivation Yak1p phosphorylates Pop2p to regulate mRNA deadenylation, the co-repressor Crf1p to inhibit transcription of ribosomal genes, and the stress-responsive transcription factors Hsf1p and Msn2p; nuclear localization negatively regulated by the Ras/PKA signaling pathway in the presence of glucose"
312,YJL144W,62.01103721,1.102782197,0.200990543,5.461250972,4.73E-08,1.55E-07,S000003680,ROQ1,315,Verified,chrX,146359,146673,1,"Ub-ligase substrate-specificity factor; proteolytically-cleaved form acts as a pseudosubstrate, binding and altering the substrate specificity of Ubr1p towards misfolded and native ER membrane and cytosolic proteins, as part of the stress-induced homeostatically regulated protein degradation (SHRED) pathway; hydrophilin essential during desiccation-rehydration; induced by osmotic stress, starvation and during stationary phase; protein abundance increases in response to DNA replication stress"
313,YJL160C,97.84785284,2.62119668,0.290309916,8.858190638,8.13E-19,5.98E-18,S000003696,PIR5,864,Uncharacterized,chrX,117962,118825,-1,"Putative protein of unknown function; member of the PIR (Proteins with Internal Repeats) family of cell wall proteins; SWAT-GFP fusion protein localizes to the endoplasmic reticulum and vacuole, and mCherry fusion localizes to the vacuole; non-essential gene that is required for sporulation; mRNA is weakly cell cycle regulated, peaking in mitosis; YJL160C has a paralog, PIR1, that arose from the whole genome duplication"
314,YJL161W,124.222955,2.098044053,0.207962328,10.00367596,1.47E-23,1.35E-22,S000003697,FMP33,543,Uncharacterized,chrX,117245,117787,1,"Putative protein of unknown function; the authentic, non-tagged protein is detected in highly purified mitochondria in high-throughput studies"
315,YJL163C,553.9351325,2.429056352,0.157659489,15.37483641,2.41E-53,6.92E-52,S000003699,YJL163C,1668,Uncharacterized,chrX,111666,113333,-1,Putative protein of unknown function
316,YJL164C,393.0911244,1.178792222,0.110376808,10.6699819,1.41E-26,1.53E-25,S000003700,TPK1,1194,Verified,chrX,109966,111159,-1,"cAMP-dependent protein kinase catalytic subunit; promotes vegetative growth in response to nutrients via the Ras-cAMP signaling pathway; inhibited by regulatory subunit Bcy1p in the absence of cAMP; phosphorylates and inhibits Whi3p to promote G1/S phase passage; partially redundant with Tpk2p and Tpk3p; phosphorylates pre-Tom40p, which impairs its import into mitochondria under non-respiratory conditions; TPK1 has a paralog, TPK3, that arose from the whole genome duplication"
317,YJL170C,152.3035171,1.941862921,0.173727021,11.12465506,9.52E-29,1.14E-27,S000003706,ASG7,630,Verified,chrX,101150,101779,-1,Protein that regulates signaling from G protein beta subunit Ste4p; contributes to relocalization of Ste4p within the cell; specific to a-cells and induced by alpha-factor
318,YJL199C,69.71034629,1.294544232,0.191684109,6.713081347,1.91E-11,8.58E-11,S000003735,MBB1,327,Uncharacterized,chrX,59856,60182,-1,"Putative protein of unknown function; conserved among S. cerevisiae strains, not conserved in closely related Saccharomyces species; protein detected in large-scale protein-protein interaction studies; YJL199C is not an essential gene"
319,YJL213W,160.3709455,1.93773084,0.205659967,9.382164457,6.46E-21,5.21E-20,S000003749,YJL213W,996,Verified,chrX,32163,33158,1,"Protein of unknown function that may interact with ribosomes; periodically expressed during the yeast metabolic cycle; phosphorylated in vitro by the mitotic exit network (MEN) kinase complex, Dbf2p/Mob1p"
320,YJR005C-A,14.20267549,1.392775085,0.397826996,3.401036448,0.000671309,0.001374271,S000028523,LSO1,282,Verified,chrX,448477,448758,-1,"Protein with a potential role in response to iron deprivation; transcription increases during iron deprivation and during treatment with 2-(6-benzyl-2-pyridyl)quinazoline (BPQ) and copper; regulated by Aft1p and, to a lesser extent, by Aft2p; originally identified as a syntenic homolog of an Ashbya gossypii gene; localizes to nucleus and cytoplasm, and nuclear localization is enhanced under iron-replete conditions"
321,YJR008W,259.3609011,1.571722923,0.150070774,10.45626558,1.37E-25,1.40E-24,S000003768,MHO1,1017,Verified,chrX,452430,453446,1,"Protein of unknown function; inhibits haploid invasive growth when overexpressed; synthetically lethal with phospholipase C (PLC1); expression induced by mild heat-stress on a non-fermentable carbon source, upon entry into stationary phase and upon nitrogen deprivation; repressed by inosine and choline in an Opi1p-dependent manner; highly conserved from bacteria to human; Memo, the human homolog, is an ErbB2 interacting protein with an essential function in cell motility"
322,YJR025C,1249.299149,2.293359269,0.087124831,26.29915429,1.96E-152,1.23E-149,S000003786,BNA1,534,Verified,chrX,471138,471671,-1,3-hydroxyanthranilic acid dioxygenase; required for the de novo biosynthesis of NAD from tryptophan via kynurenine; expression regulated by Hst1p
323,YJR036C,135.1971413,1.652387682,0.185003581,8.896359359,5.77E-19,4.28E-18,S000003797,HUL4,2679,Verified,chrX,500713,503391,-1,Protein with similarity to hect domain E3 ubiquitin-protein ligases; not essential for viability; found in association with Trf4 in TRAMP complex
324,YJR037W,6.205909493,1.700829562,0.455771084,3.366675464,0.000760802,0.001543326,S000003798,YJR037W,384,Dubious,chrX,503102,503485,1,"Dubious open reading frame; unlikely to encode a functional protein, based on available experimental and comparative sequence data; partially overlaps verified gene HUL4/YJR036C; deletion mutant has decreased spore survival in Drosophila feces"
325,YJR038C,11.82867036,2.309411613,0.408954464,5.130391411,2.89E-07,8.78E-07,S000003799,YJR038C,363,Dubious,chrX,503710,504072,-1,"Dubious open reading frame; unlikely to encode a functional protein, based on available experimental and comparative sequence data"
326,YJR039W,291.1290988,1.189818375,0.118000052,10.07124988,7.40E-24,6.92E-23,S000003800,MLO127,3366,Uncharacterized,chrX,503936,507301,1,"Putative protein of unknown function; the authentic, non-tagged protein is detected in highly purified mitochondria in high-throughput studies"
327,YJR058C,324.5212269,1.189426093,0.117295335,10.13165458,4.00E-24,3.79E-23,S000003819,APS2,444,Verified,chrX,544732,545175,-1,Small subunit of the clathrin-associated adaptor complex AP-2; AP-2 is involved in protein sorting at the plasma membrane; related to the sigma subunit of the mammalian plasma membrane clathrin-associated protein (AP-2) complex
328,YJR073C,4162.965761,1.902525294,0.156650105,12.15193393,5.60E-34,8.40E-33,S000003834,OPI3,621,Verified,chrX,572315,572935,-1,Methylene-fatty-acyl-phospholipid synthase; catalyzes the last two steps in phosphatidylcholine biosynthesis; also known as phospholipid methyltransferase
329,YJR074W,364.8628714,1.120403958,0.107565986,10.41148801,2.20E-25,2.21E-24,S000003835,MOG1,657,Verified,chrX,573095,573751,1,Conserved nuclear protein that interacts with GTP-Gsp1p; stimulates nucleotide release from Gsp1p; involved in nuclear protein import; nucleotide release is inhibited by Yrb1p
330,YJR078W,326.3518603,1.964443814,0.146778544,13.31536192,1.88E-40,3.58E-39,S000003839,BNA2,1362,Verified,chrX,578860,580221,1,"Tryptophan 2,3-dioxygenase or indoleamine 2,3-dioxygenase; required for de novo biosynthesis of NAD from tryptophan via kynurenine; interacts genetically with telomere capping gene CDC13; regulated by Hst1p and Aftp"
331,YJR109C,8645.553397,3.894333437,0.123326376,31.56713536,1.04E-218,1.30E-215,S000003870,CPA2,3357,Verified,chrX,629585,632941,-1,"Large subunit of carbamoyl phosphate synthetase; carbamoyl phosphate synthetase catalyzes a step in the synthesis of citrulline, an arginine precursor"
332,YJR111C,503.7337854,2.019019395,0.173342971,11.63424845,2.76E-31,3.67E-30,S000003872,PXP2,852,Verified,chrX,635855,636706,-1,"Peroxisomal matrix protein with naturally active promoter; well-conserved in fungi; localized to peroxisomes under physiological growth conditions; levels of some amino acids are altered upon both knockout and overexpression, suggesting potential involvement of Pxp2p in amino acid metabolism or related cellular metabolic processes (needs further study); GFP-fusion protein displays inherent dual localization with large proportion localizing to cytosol"
333,YJR128W,23.64520081,1.311368118,0.286483734,4.490993966,7.09E-06,1.85E-05,S000003889,YJR128W,360,Uncharacterized,chrX,662921,663280,1,Putative protein of unknown function; conserved among S. cerevisiae strains; partially overlaps the verified ORF RSF2
334,YJR130C,966.7923354,2.919743766,0.216956191,13.44328187,3.37E-41,6.53E-40,S000003891,STR2,1920,Verified,chrX,665218,667137,-1,"Cystathionine gamma-synthase, converts cysteine into cystathionine; STR2 has a paralog, YML082W, that arose from the whole genome duplication"
335,YJR154W,376.6117098,1.743975433,0.221162097,7.907434755,2.63E-15,1.57E-14,S000003915,YJR154W,1041,Uncharacterized,chrX,725784,726824,1,Putative protein of unknown function; green fluorescent protein (GFP)-fusion protein localizes to the cytoplasm
336,YJR155W,399.6459218,1.092996587,0.191054018,5.753865597,8.72E-09,3.07E-08,S000003916,AAD10,867,Verified,chrX,727405,728271,1,"Putative aryl-alcohol dehydrogenase; similar to P. chrysosporium aryl-alcohol dehydrogenase; mutational analysis has not yet revealed a physiological role; members of the AAD gene family comprise three pairs (AAD3 + AAD15, AAD6/AAD16 + AAD4, AAD10 + AAD14) whose two genes are more related to one another than to other members of the family"
337,YKL008C,2175.345836,1.29316949,0.124137021,10.41546698,2.11E-25,2.13E-24,S000001491,LAC1,1257,Verified,chrXI,427295,428551,-1,"Ceramide synthase component; involved in synthesis of ceramide from C26(acyl)-coenzyme A and dihydrosphingosine or phytosphingosine, functionally equivalent to Lag1p; LAC1 has a paralog, LAG1, that arose from the whole genome duplication"
338,YKL023W,283.2643983,1.514001608,0.165211679,9.155582399,5.41E-20,4.19E-19,S000001506,YKL023W,834,Uncharacterized,chrXI,393721,394554,1,Putative protein of unknown function; predicted by computational methods to be involved in mRNA degradation; green fluorescent protein (GFP)-fusion protein localizes to the cytoplasm
339,YKL026C,55.47710327,1.436405966,0.214395771,6.637646834,3.19E-11,1.41E-10,S000001509,GPX1,504,Verified,chrXI,389380,389883,-1,"Phospholipid hydroperoxide glutathione peroxidase; induced by glucose starvation that protects cells from phospholipid hydroperoxides and nonphospholipid peroxides during oxidative stress; GPX1 has a paralog, HYR1, that arose from the whole genome duplication"
340,YKL033W-A,1957.515593,1.37886319,0.113622681,12.134488,6.93E-34,1.03E-32,S000007242,YKL033W-A,711,Uncharacterized,chrXI,374505,375215,1,Putative protein of unknown function; similar to uncharacterized proteins from other fungi
341,YKL037W,22.93168152,2.207988316,0.3556775,5.933154046,2.97E-09,1.10E-08,S000001520,AIM26,357,Verified,chrXI,369365,369721,1,Protein of unknown function; null mutant is viable and displays elevated frequency of mitochondrial genome loss; null mutation confers sensitivity to tunicamycin and DTT
342,YKL051W,796.7544719,1.689219636,0.117522818,14.3677678,8.24E-47,1.90E-45,S000001534,SFK1,1062,Verified,chrXI,341312,342373,1,Plasma membrane protein that may act to generate normal levels of PI4P; may act together with or upstream of Stt4p; at least partially mediates proper localization of Stt4p to the plasma membrane
343,YKL071W,308.1142095,2.029281604,0.195661023,10.34828229,4.26E-25,4.20E-24,S000001554,YKL071W,771,Verified,chrXI,305114,305884,1,"NADH-dependent aldehyde reductase; involved in detoxification of furfural; expression is upregulated in cells treated with the aldehydes furfural and glycolaldehyde, the mycotoxin patulin, and also the quinone methide triterpene celastrol; green fluorescent protein (GFP)-fusion protein localizes to the cytoplasm"
344,YKL091C,222.7516863,1.257375145,0.111101604,11.29595999,1.37E-29,1.70E-28,S000001574,YKL091C,933,Verified,chrXI,269718,270650,-1,"Putative phosphatidylinositol/phosphatidylcholine transfer protein; possibly involved in lipid metabolism; localizes to the nucleus; contains a CRAL/TRIO domain and binds several lipids in a large-scale study; YKL091C has a paralog, SEC14, that arose from the whole genome duplication"
345,YKL103C,1921.455466,1.879787956,0.088722598,21.18218486,1.39E-99,1.68E-97,S000001586,APE1,1545,Verified,chrXI,246138,247682,-1,Vacuolar aminopeptidase yscI; zinc metalloproteinase that belongs to the peptidase family M18; often used as a marker protein in studies of autophagy and cytosol to vacuole targeting (CVT) pathway; protein increases in abundance and relative distribution to cytoplasmic foci increases upon DNA replication stress
346,YKL107W,41.34441002,1.10713246,0.267040312,4.1289397,3.64E-05,8.77E-05,S000001590,YKL107W,930,Uncharacterized,chrXI,236141,237070,1,Putative short-chain dehydrogenase/reductase; proposed to be a palmitoylated membrane protein
347,YKL142W,685.9353138,1.172185421,0.106563556,10.99647754,3.97E-28,4.61E-27,S000001625,MRP8,660,Verified,chrXI,178515,179174,1,Protein of unknown function; undergoes sumoylation; transcription induced under cell wall stress; protein levels are reduced under anaerobic conditions; protein abundance increases in response to DNA replication stress; originally thought to be a mitochondrial ribosomal protein based on sequence analysis
348,YKL163W,380.3408755,1.121704476,0.180007544,6.261558754,3.81E-10,1.53E-09,S000001646,PIR3,978,Verified,chrXI,144401,145378,1,"O-glycosylated covalently-bound cell wall protein; required for cell wall stability; expression is cell cycle regulated, peaking in M/G1 and also subject to regulation by the cell integrity pathway; coding sequence contains length polymorphisms in different strains; PIR3 has a paralog, HSP150, that arose from the whole genome duplication"
349,YKL177W,8.270015192,1.555835293,0.438205793,3.298469781,0.000972133,0.001941162,S000001660,YKL177W,339,Dubious,chrXI,114356,114694,1,"Dubious open reading frame; unlikely to encode a functional protein, based on available experimental and comparative sequence data; partially overlaps the verified gene STE3"
350,YKL188C,148.4309368,1.878441095,0.190636679,9.809104669,1.03E-22,9.21E-22,S000001671,PXA2,2562,Verified,chrXI,86225,88786,-1,"Subunit of heterodimeric peroxisomal ABC transport complex, with Pxa1p; required for import of long-chain fatty acids into peroxisomes; similar to human adrenoleukodystrophy transportesr ABCD1 and ABCD2, and ALD-related proteins; mutations in ABCD1 cause X-linked adrenoleukodystrophy (X-ALD), a peroxisomal disorder; human ABCD1 and ABCD2 can each partially complement yeast pxa1 pxa2 double null mutant"
351,YKL208W,110.3164895,1.032084816,0.140215818,7.338525773,2.16E-13,1.12E-12,S000001691,CBT1,816,Verified,chrXI,47157,47972,1,"Protein involved in 5' RNA end processing; substrates include mitochondrial COB, 15S_rRNA, and RPM1 transcripts; may also have a role in 3' end processing of the COB pre-mRNA; displays genetic interaction with cell cycle-regulated kinase Dbf2p"
352,YKL211C,2446.219401,2.094128794,0.106320017,19.69219149,2.52E-86,1.87E-84,S000001694,TRP3,1455,Verified,chrXI,36699,38153,-1,Indole-3-glycerol-phosphate synthase; forms bifunctional hetero-oligomeric anthranilate synthase:indole-3-glycerol phosphate synthase enzyme complex with Trp2p
353,YKL218C,865.7318302,3.15001434,0.183041625,17.17223378,4.29E-66,1.76E-64,S000001701,SRY1,981,Verified,chrXI,17359,18339,-1,3-hydroxyaspartate dehydratase; deaminates L-threo-3-hydroxyaspartate to form oxaloacetate and ammonia; required in the presence of hydroxyaspartate; highly similar to mouse serine racemase (Srr) but has no serine racemase activity
354,YKR009C,244.1970329,1.228327394,0.128458975,9.54924968,1.31E-21,1.09E-20,S000001717,FOX2,2703,Verified,chrXI,454352,457054,-1,3-hydroxyacyl-CoA dehydrogenase and enoyl-CoA hydratase; multifunctional enzyme of the peroxisomal fatty acid beta-oxidation pathway; mutation is functionally complemented by human HSD17B4
355,YKR052C,400.6278106,1.008073517,0.117464504,8.580667717,9.43E-18,6.44E-17,S000001760,MRS4,915,Verified,chrXI,532550,533464,-1,"Iron transporter of the mitochondrial carrier family; mediates Fe2+ transport across the inner mitochondrial membrane; active under low-iron conditions; may transport other cations; protein abundance increases in response to DNA replication stress; MRS4 has a paralog, MRS3, that arose from the whole genome duplication"
356,YKR053C,287.3586655,1.213946421,0.178085659,6.813086476,9.55E-12,4.40E-11,S000001761,YSR3,1215,Verified,chrXI,534067,535281,-1,"Dihydrosphingosine 1-phosphate phosphatase; membrane protein involved in sphingolipid metabolism; YSR3 has a paralog, LCB3, that arose from the whole genome duplication"
357,YKR058W,328.9839783,1.761001123,0.145905826,12.0488741,1.97E-33,2.89E-32,S000001766,GLG1,1851,Verified,chrXI,552770,554620,1,"Glycogenin glucosyltransferase; self-glucosylating initiator of glycogen synthesis, also glucosylates n-dodecyl-beta-D-maltoside; SWAT-GFP and mCherry fusion proteins localize to the cell periphery and vacuole respectively; similar to mammalian glycogenin; GLG1 has a paralog, GLG2, that arose from the whole genome duplication"
358,YKR076W,358.0509121,1.847952084,0.124077141,14.86426641,5.62E-50,1.43E-48,S000001784,ECM4,1113,Verified,chrXI,582283,583395,1,"S-glutathionyl-(chloro)hydroquinone reductase (GS-HQR); glutathione transferase involved in cell-surface biosynthesis and architecture; catalyzes glutathione (GSH)-dependent reduction of GS-trichloro-p-hydroquinone to trichloro-p-hydroquinone; expression upregulated upon exposure to genotoxic agents, such as methyl methanesulfonate, cisplatin and bleomycin; not an essential gene; similar to YGR154C; green fluorescent protein (GFP)-fusion protein localizes to cytoplasm"
359,YKR091W,157.3653649,1.445526506,0.193908048,7.441751229,9.94E-14,5.31E-13,S000001799,SRL3,741,Verified,chrXI,611525,612265,1,"GTB motif (G1/S transcription factor binding) containing protein; binds SBF-regulated promoters in hydroxyurea-treated cells; when overexpressed, suppresses the lethality of a rad53 null mutation; potential Cdc28p substrate; SRL3 has a paralog, WHI5, that arose from the whole genome duplication"
360,YKR097W,149.4292071,1.198085395,0.189255702,6.322471487,2.57E-10,1.04E-09,S000001805,PCK1,1650,Verified,chrXI,631152,632801,1,"Phosphoenolpyruvate carboxykinase; key enzyme in gluconeogenesis, catalyzes early reaction in carbohydrate biosynthesis, glucose represses transcription and accelerates mRNA degradation, regulated by Mcm1p and Cat8p, located in the cytosol"
361,YKR106W,132.5577581,1.493213124,0.15915446,9.346742941,9.04E-21,7.26E-20,S000001814,GEX2,1848,Verified,chrXI,661442,663289,1,"Proton:glutathione antiporter; localized to the vacuolar and plasma membranes; expressed at a very low level; potential role in resistance to oxidative stress and modulation of the PKA pathway; GEX2 has a paralog, GEX1, that arose from a segmental duplication"
362,YLL025W,44.7492291,1.163878878,0.243451044,4.758724488,1.95E-06,5.41E-06,S000003948,PAU17,375,Verified,chrXII,94747,95121,1,Protein of unknown function; member of the seripauperin multigene family encoded mainly in subtelomeric regions; SWAT-GFP and mCherry fusion proteins localize to the vacuole; YLL025W is not an essential gene
363,YLL028W,4514.492289,2.836950568,0.136532186,20.77181588,7.79E-96,7.98E-94,S000003951,TPO1,1761,Verified,chrXII,84804,86564,1,"Polyamine transporter of the major facilitator superfamily; member of the 12-spanner drug:H(+) antiporter DHA1 family; recognizes spermine, putrescine, and spermidine; catalyzes uptake of polyamines at alkaline pH and excretion at acidic pH; during oxidative stress exports spermine, spermidine from the cell, which controls timing of expression of stress-responsive genes; phosphorylation enhances activity and sorting to the plasma membrane"
364,YLL046C,11.68550068,1.40532072,0.442100008,3.035430283,0.002401927,0.004501454,S000003969,RNP1,750,Verified,chrXII,46714,47463,-1,"Ribonucleoprotein that contains two RNA recognition motifs (RRM); RNP1 has a paralog, SBP1, that arose from the whole genome duplication"
365,YLL047W,7.196469358,2.372029882,0.518057736,4.489382638,7.14E-06,1.86E-05,S000003970,YLL047W,384,Dubious,chrXII,46672,47055,1,"Dubious open reading frame; unlikely to encode a functional protein, based on available experimental and comparative sequence data; partially overlaps verified gene RNP1"
366,YLL056C,172.316698,2.06029548,0.233462222,8.789869415,1.50E-18,1.08E-17,S000003979,YLL056C,897,Uncharacterized,chrXII,27409,28305,-1,Putative protein of unknown function; transcription is activated by paralogous transcription factors Yrm1p and Yrr1p and genes involved in pleiotropic drug resistance (PDR); expression is induced in cells treated with the mycotoxin patulin; SWAT-GFP and mCherry fusion proteins localize to the endoplasmic reticulum and vacuole respectively
367,YLL057C,138.4428935,1.078329728,0.195536068,5.509387689,3.60E-08,1.19E-07,S000003980,JLP1,1239,Verified,chrXII,25756,26994,-1,Fe(II)-dependent sulfonate/alpha-ketoglutarate dioxygenase; involved in sulfonate catabolism for use as a sulfur source; contains sequence that resembles a J domain (typified by the E. coli DnaJ protein); induced by sulphur starvation
368,YLL059C,27.21802291,1.389024438,0.281335003,4.854529566,1.21E-06,3.44E-06,S000003982,YLL059C,507,Dubious,chrXII,22474,22980,-1,"Dubious open reading frame; unlikely to encode a functional protein, based on available experimental and comparative sequence data"
369,YLL060C,79.82240411,1.536246941,0.175754397,8.677201227,4.06E-18,2.84E-17,S000003983,GTT2,702,Verified,chrXII,21138,21839,-1,"Glutathione S-transferase capable of homodimerization; functional overlap with Gtt2p, Grx1p, and Grx2p; protein abundance increases in response to DNA replication stress"
370,YLR011W,105.0084665,1.129501689,0.165155162,6.823172259,8.91E-12,4.11E-11,S000004001,LOT6,576,Verified,chrXII,169103,169678,1,FMN-dependent NAD(P)H:quinone reductase; role in apoptosis-like cell death; may be involved in quinone detoxification; expression elevated at low temperature; sequesters the Cin5p transcription factor in the cytoplasm in complex with the proteasome under reducing conditions
371,YLR034C,2180.209382,1.2683225,0.087082935,14.56374983,4.78E-48,1.14E-46,S000004024,SMF3,1422,Verified,chrXII,210512,211933,-1,Putative divalent metal ion transporter involved in iron homeostasis; transcriptionally regulated by metal ions; member of the Nramp family of metal transport proteins; protein abundance increases in response to DNA replication stress
372,YLR070C,96.00784384,1.199285549,0.192435847,6.217805329,5.04E-10,2.00E-09,S000004060,XYL2,1071,Verified,chrXII,274141,275211,-1,"Xylitol dehydrogenase; converts xylitol to D-xylulose; expression induced by xylose, even though this pentose sugar is not well utilized by S. cerevisiae; null mutant has cell wall defect"
373,YLR080W,134.886431,1.478682322,0.162550799,9.063260859,1.27E-19,9.65E-19,S000004070,EMP46,1335,Verified,chrXII,287916,289250,1,"Integral membrane component of ER-derived COPII-coated vesicles; functions in ER to Golgi transport; EMP46 has a paralog, EMP47, that arose from the whole genome duplication"
374,YLR097C,220.4719477,1.121235865,0.107064613,10.45618841,1.37E-25,1.40E-24,S000004087,HRT3,1035,Verified,chrXII,336231,337265,-1,"Putative SCF-ubiquitin ligase F-box protein; based on both genetic and physical interactions and sequence similarity; identified in association with Cdc53p, Skp1p and Ubi4 in large and small-scale studies"
375,YLR099C,1699.351416,3.148362441,0.134861584,23.31933888,2.82E-120,6.08E-118,S000004089,ICT1,1185,Verified,chrXII,339744,340928,-1,"Lysophosphatidic acid acyltransferase; responsible for enhanced phospholipid synthesis during organic solvent stress; null displays increased sensitivity to Calcofluor white; highly expressed during organic solvent stress; ICT1 has a paralog, ECM18, that arose from the whole genome duplication; human ABHD5 can complement ict1 null mutant"
376,YLR099W-A,204.7649528,1.097986163,0.122712279,8.935313166,4.06E-19,3.03E-18,S000007618,MIM2,264,Verified,chrXII,341325,341588,1,"Mitochondrial protein required for outer membrane protein import; involved in import of the subset of proteins with multiple alpha-helical transmembrane segments, including Ugo1p, Tom20p, and Fzo1p; component of a large protein complex in the outer membrane that includes Mim1p; not essential in W303 strain background"
377,YLR102C,92.17334302,1.109490009,0.170968114,6.466630952,1.00E-10,4.22E-10,S000004092,APC9,798,Verified,chrXII,342970,343767,-1,"Subunit of the Anaphase-Promoting Complex/Cyclosome (APC/C); APC/C is a ubiquitin-protein ligase required for degradation of anaphase inhibitors, including mitotic cyclins, during the metaphase/anaphase transition"
378,YLR140W,22.58188892,1.129968467,0.312373963,3.576735409,0.000347912,0.000742624,S000004130,YLR140W,327,Dubious,chrXII,423474,423800,1,Dubious open reading frame unlikely to encode a functional protein; overlaps essential RRN5 gene which encodes a member of the UAF transcription factor involved in transcription of rDNA by RNA polymerase I
379,YLR149C,242.96893,1.502814958,0.118380914,12.66580734,9.15E-37,1.50E-35,S000004139,YLR149C,2193,Verified,chrXII,437631,439823,-1,Protein of unknown function; overexpression causes a cell cycle delay or arrest; null mutation results in a decrease in plasma membrane electron transport; YLR149C is not an essential gene; protein abundance increases in response to DNA replication stress
380,YLR152C,1375.06625,3.52781641,0.268616619,13.11938224,2.55E-39,4.65E-38,S000004142,YLR152C,1731,Uncharacterized,chrXII,442958,444688,-1,Putative protein of unknown function; YLR152C is not an essential gene
381,YLR156W,59.57665118,1.287653281,0.302375724,4.258364353,2.06E-05,5.10E-05,S000004146,YLR156W,345,Uncharacterized,chrXII,472113,472457,1,"Putative protein of unknown function; exhibits a two-hybrid interaction with Jsn1p in a large-scale analysis; YLR156W has a paralog, YLR159W, that arose from a segmental duplication"
382,YLR157W-D,34.70052537,1.254631089,0.352755908,3.53716687,0.000404444,0.000854251,S000028677,YLR157W-D,213,Uncharacterized,chrXII,475764,475976,1,"Putative protein of unknown function; identified by gene-trapping, microarray-based expression analysis, and genome-wide homology searching; YLR157W-D has a paralog, YLR161W, that arose from a segmental duplication"
383,YLR164W,101.5268618,1.475746904,0.256504738,5.729383969,1.01E-08,3.52E-08,S000004154,SHH4,507,Verified,chrXII,493883,494389,1,"Putative alternate subunit of succinate dehydrogenase (SDH); mitochondrial inner membrane protein; genetic interaction with SDH4 suggests that Shh4p can function as a functional SDH subunit; a fraction copurifies with SDH subunit Sdh3p; expression induced by nitrogen limitation in a GLN3, GAT1-dependent manner; Shh4p has greater similarity to human SDHD (subunit D of SDH, implicated in paraganglioma) than does its paralog Sdh4p"
384,YLR177W,505.4556638,1.229231418,0.113483691,10.82586492,2.60E-27,2.92E-26,S000004167,YLR177W,1887,Uncharacterized,chrXII,511054,512940,1,"Putative protein of unknown function; phosphorylated by Dbf2p-Mob1p in vitro; some strains contain microsatellite polymophisms at this locus; not an essential gene; YLR177W has a paralog, PSP1, that arose from the whole genome duplication"
385,YLR178C,628.1778251,1.507579895,0.120876229,12.46594388,1.15E-35,1.79E-34,S000004168,TFS1,660,Verified,chrXII,513162,513821,-1,"Inhibitor of carboxypeptidase Y (Prc1p), and Ras GAP (Ira2p); phosphatidylethanolamine-binding protein (PEBP) family member and ortholog of hPEBP1/RKIP, a natural metastasis suppressor; targets to vacuolar membranes during stationary phase; acetylated by NatB N-terminal acetyltransferase; protein abundance increases in response to DNA replication stress"
386,YLR193C,303.2053216,1.003716391,0.165912643,6.046688055,1.48E-09,5.64E-09,S000004183,UPS1,528,Verified,chrXII,540009,540536,-1,Phosphatidic acid transfer protein; plays a role in phospholipid metabolism by transporting phosphatidic acid from the outer to the inner mitochondrial membrane; localizes to the mitochondrial intermembrane space; null mutant has altered cardiolipin and phosphatidic acid levels; ortholog of human PRELI
387,YLR205C,339.600534,2.43390741,0.241991045,10.03979576,1.02E-23,9.44E-23,S000004195,HMX1,954,Verified,chrXII,552724,553677,-1,ER localized heme oxygenase; involved in heme degradation during iron starvation and in the oxidative stress response; expression is regulated by AFT1 and oxidative stress; relocates to the perinuclear region in the presence of oxidants
388,YLR239C,229.3754948,1.004409137,0.168464853,5.956318673,2.58E-09,9.58E-09,S000004229,LIP2,987,Verified,chrXII,616332,617318,-1,Lipoyl ligase; involved in the modification of mitochondrial enzymes by the attachment of lipoic acid groups
389,YLR251W,188.3827165,1.90757985,0.160538852,11.83476658,2.58E-32,3.61E-31,S000004241,SYM1,594,Verified,chrXII,641464,642057,1,"Protein required for ethanol metabolism; induced by heat shock and localized to the inner mitochondrial membrane; homologous to mammalian peroxisomal membrane protein Mpv17; human homolog MPV17 is implicated in hepatocerebral mtDNA depletion syndromes (MDDS), and complements yeast null mutant"
390,YLR252W,61.39914273,1.734776731,0.228676938,7.496770834,6.54E-14,3.55E-13,S000004242,YLR252W,306,Dubious,chrXII,641957,642262,1,"Dubious open reading frame; unlikely to encode a functional protein, based on available experimental and comparative sequence data; partially overlaps the verified gene SYM1, a mitochondrial protein involved in ethanol metabolism"
391,YLR258W,2140.817963,1.38221681,0.13152357,10.50776745,7.96E-26,8.29E-25,S000004248,GSY2,2118,Verified,chrXII,660716,662833,1,"Glycogen synthase; expression induced by glucose limitation, nitrogen starvation, heat shock, and stationary phase; activity regulated by cAMP-dependent, Snf1p and Pho85p kinases as well as by the Gac1p-Glc7p phosphatase; GSY2 has a paralog, GSY1, that arose from the whole genome duplication; relocalizes from cytoplasm to plasma membrane upon DNA replication stress"
392,YLR266C,671.7228426,1.130909606,0.138951098,8.136095128,4.08E-16,2.57E-15,S000004256,PDR8,2106,Verified,chrXII,675619,677724,-1,"Transcription factor; targets include ATP-binding cassette (ABC) transporters, major facilitator superfamily transporters, and other genes involved in the pleiotropic drug resistance (PDR) phenomenon; PDR8 has a paralog, YRR1, that arose from the whole genome duplication"
393,YLR267W,257.2985231,2.419059226,0.272510291,8.837864956,9.76E-19,7.14E-18,S000004257,BOP2,1713,Uncharacterized,chrXII,678212,679924,1,Protein of unknown function
394,YLR279W,26.29220936,1.47892246,0.301376359,4.8052583,1.55E-06,4.34E-06,S000004269,YLR279W,390,Dubious,chrXII,704309,704698,1,"Dubious open reading frame; unlikely to encode a functional protein, based on available experimental and comparative sequence data"
395,YLR281C,41.76980855,1.378254951,0.257548565,5.292140606,1.21E-07,3.80E-07,S000004271,RSO55,468,Uncharacterized,chrXII,704493,704960,-1,Putative protein of unknown function; green fluorescent protein (GFP)-fusion protein localizes to mitochondria; YLR281C is not an essential gene
396,YLR290C,424.3936483,2.178745496,0.181132772,12.00862559,3.20E-33,4.61E-32,S000004281,COQ11,834,Verified,chrXII,717145,717978,-1,"Putative oxidoreductase, subunit of Coenzyme Q biosynthetic complexes; required for synthesis of wild-type levels of Coenzyme Q (ubiquinone); member of the short-chain dehydrogenase/reductase (SDR) superfamily; orthologous gene in some other fungi is fused to the COQ10 ortholog"
397,YLR307C-A,28.30896585,1.43756125,0.458135068,3.208453251,0.00133451,0.002603231,S000028525,DPA10,264,Uncharacterized,chrXII,746848,747111,-1,Putative protein of unknown function
398,YLR312C,69.78939513,1.311544531,0.234576647,5.580978025,2.39E-08,8.07E-08,S000004303,ATG39,1197,Verified,chrXII,757637,758833,-1,Autophagy receptor with a role in degradation of the ER and nucleus; involved specifically in autophagy of perinuclear endoplasmic reticulum in response to nitrogen starvation or rapamycin treatment; localizes to the perinuclear ER
399,YLR346C,149.8327324,2.567188224,0.166614148,15.22363954,2.46E-52,6.67E-51,S000004338,CIS1,306,Verified,chrXII,822287,822592,-1,"Protein of unknown function found in mitochondria; expression is regulated by transcription factors involved in pleiotropic drug resistance, Pdr1p and Yrr1p; not an essential gene; YLR346C has a paralog, YGR035C, that arose from the whole genome duplication"
400,YLR348C,895.1041756,1.086096379,0.094876817,11.43972184,2.65E-30,3.37E-29,S000004340,DIC1,897,Verified,chrXII,826977,827873,-1,"Mitochondrial dicarboxylate carrier; integral membrane protein, catalyzes a dicarboxylate-phosphate exchange across the inner mitochondrial membrane, transports cytoplasmic dicarboxylates into the mitochondrial matrix"
401,YLR349W,91.6164467,1.112597019,0.157331384,7.026981281,2.11E-12,1.02E-11,S000004341,YLR349W,507,Dubious,chrXII,827521,828027,1,"Dubious open reading frame; unlikely to encode a functional protein, based on available experimental and comparative sequence data; overlaps the verified ORF DIC1/YLR348C"
402,YLR356W,562.0707321,1.026709221,0.091591519,11.20815301,3.72E-29,4.54E-28,S000004348,ATG33,594,Verified,chrXII,840321,840914,1,"Mitochondrial mitophagy-specific protein; required primarily for mitophagy induced at post-log phase; not required for other types of selective autophagy or macroautophagy; conserved within fungi, but not in higher eukaryotes; ATG33 has a paralog, SCM4, that arose from the whole genome duplication"
403,YLR377C,64.99633671,1.056723116,0.244259969,4.309066839,1.64E-05,4.11E-05,S000004369,FBP1,1047,Verified,chrXII,873746,874792,-1,"Fructose-1,6-bisphosphatase; key regulatory enzyme in the gluconeogenesis pathway, required for glucose metabolism; undergoes either proteasome-mediated or autophagy-mediated degradation depending on growth conditions; glucose starvation results in redistribution to the periplasm; interacts with Vid30p"
404,YLR456W,64.16370615,1.373218073,0.204994825,6.656164375,2.81E-11,1.25E-10,S000004448,YLR456W,615,Uncharacterized,chrXII,1055070,1055684,1,"Protein of unknown function; predicted to encode a pyridoxal 5'-phosphate synthase based on sequence similarity but purified protein does not possess this activity, nor does it bind flavin mononucleotide (FMN); null mutant displays increased resistance to antifungal agents gliotoxin, cycloheximide and H2O2; YLR456W has a paralog, YPR172W, that arose from the whole genome duplication"
405,YLR461W,13.69837122,1.477410882,0.448939193,3.230504121,0.001235721,0.002425661,S000004453,PAU4,363,Verified,chrXII,1062919,1063281,1,"Member of the seripauperin multigene family; encoded mainly in subtelomeric regions; SWAT-GFP fusion protein localizes to the endoplasmic reticulum and vacuole, while mCherry fusion localizes to just the vacuole; active during alcoholic fermentation; regulated by anaerobiosis; negatively regulated by oxygen; repressed by heme"
406,YML042W,235.0774901,1.803392197,0.197467544,9.113591048,7.97E-20,6.12E-19,S000004506,CAT2,2013,Verified,chrXIII,192788,194800,1,Carnitine acetyl-CoA transferase; present in both mitochondria and peroxisomes; transfers activated acetyl groups to carnitine to form acetylcarnitine which can be shuttled across membranes
407,YML100W,2693.196155,1.125776266,0.100886948,11.15773677,6.56E-29,7.94E-28,S000004566,TSL1,3297,Verified,chrXIII,70624,73920,1,"Large subunit of trehalose 6-phosphate synthase/phosphatase complex; Tps1p-Tps2p complex converts uridine-5'-diphosphoglucose and glucose 6-phosphate to trehalose; contributes to survival to acute lethal heat stress; mutant has aneuploidy tolerance; protein abundance increases in response to DNA replication stress; TSL1 has a paralog, TPS3, that arose from the whole genome duplication"
408,YML116W,843.1254713,2.474045407,0.196380495,12.58736935,2.48E-36,3.97E-35,S000004584,ATR1,1629,Verified,chrXIII,38196,39824,1,"Multidrug efflux pump of the major facilitator superfamily; required for resistance to aminotriazole and 4-nitroquinoline-N-oxide; ATR1 has a paralog, YMR279C, that arose from the whole genome duplication; protein abundance increases in response to DNA replication stress"
409,YML131W,324.3427642,1.668490476,0.147364009,11.30491151,1.24E-29,1.54E-28,S000004600,YML131W,1098,Verified,chrXIII,10198,11295,1,"Protein of unknown function; similar to medium chain dehydrogenase/reductases; expression induced by stresses including osmotic shock, DNA damaging agents, and other chemicals; GFP-fusion protein localizes to the cytoplasm; protein abundance increases in response to DNA replication stress"
410,YMR018W,55.10546592,1.045260253,0.225358716,4.629948377,3.66E-06,9.84E-06,S000004620,PEX9,1545,Verified,chrXIII,310208,311752,1,"Peroxisomal membrane signal receptor for peroxisomal matrix proteins; oleate-inducible condition-specific import receptor for a subset of PTS1-containing matrix proteins; localizes to both the cytosol and the peroxisomal membrane; similar to human PEX5Rp, a peroxin protein 5 related protein; paralog of Pex5p"
411,YMR019W,586.5558855,1.31635752,0.136264666,9.655622859,4.65E-22,4.01E-21,S000004621,STB4,2850,Verified,chrXIII,312156,315005,1,Putative transcription factor; contains a Zn(II)2Cys6 zinc finger domain characteristic of DNA-binding proteins; computational analysis suggests a role in regulation of expression of genes encoding transporters; binds Sin3p in a two-hybrid assay;
412,YMR020W,418.3779275,1.584467783,0.135433294,11.68781633,1.47E-31,1.99E-30,S000004622,FMS1,1527,Verified,chrXIII,315377,316903,1,"Polyamine oxidase; converts spermine to spermidine, which is required for the essential hypusination modification of translation factor eIF-5A; also involved in pantothenic acid biosynthesis"
413,YMR035W,220.5236071,1.19014359,0.161159542,7.374772966,1.65E-13,8.60E-13,S000004638,IMP2,534,Verified,chrXIII,341142,341675,1,"Catalytic subunit of mitochondrial inner membrane peptidase complex; required for maturation of mitochondrial proteins of the intermembrane space; complex contains two catalytic subunits (Imp1p and Imp2p that differ in substrate specificity), and Som1p"
414,YMR041C,242.3795091,1.137220142,0.152039418,7.473082575,7.83E-14,4.24E-13,S000004644,ARA2,1008,Verified,chrXIII,350966,351973,-1,"NAD-dependent arabinose dehydrogenase; involved in biosynthesis of dehydro-D-arabinono-1,4-lactone; similar to plant L-galactose dehydrogenase"
415,YMR042W,266.7262288,1.389917871,0.188607162,7.361262045,1.82E-13,9.50E-13,S000004645,ARG80,534,Verified,chrXIII,352603,353136,1,Transcription factor involved in regulating arginine-responsive genes; acts with Arg81p and Arg82p
416,YMR052C-A,17.24148468,1.148985307,0.346973899,3.277900603,0.001045822,0.002075708,S000004655,YMR052C-A,366,Dubious,chrXIII,380069,380434,-1,"Dubious open reading frame; unlikely to encode a functional protein, based on available experimental and comparative sequence data"
417,YMR053C,135.1503183,1.166483232,0.133697125,8.700965243,3.29E-18,2.31E-17,S000004657,STB2,2553,Verified,chrXIII,380346,382898,-1,"Protein that interacts with Sin3p in a two-hybrid assay; part of a large protein complex with Sin3p and Stb1p; STB2 has a paralog, STB6, that arose from the whole genome duplication"
418,YMR062C,3666.095721,3.540515156,0.143477051,24.66196335,2.74E-134,1.01E-131,S000004666,ARG7,1326,Verified,chrXIII,395054,396379,-1,"Mitochondrial ornithine acetyltransferase; catalyzes the fifth step in arginine biosynthesis; also possesses acetylglutamate synthase activity, regenerates acetylglutamate while forming ornithine"
419,YMR084W,30.04504956,1.585927707,0.2986485,5.21085599,1.88E-07,5.79E-07,S000004689,YMR084W,789,Uncharacterized,chrXIII,436628,437416,1,"Putative protein of unknown function; YMR084W and adjacent ORF YMR085W are merged in related strains, and together are paralogous to glutamine-fructose-6-phosphate amidotransferase GFA1"
420,YMR085W,68.1604215,1.11690658,0.19352738,5.746232707,9.13E-09,3.21E-08,S000004690,YMR085W,1299,Uncharacterized,chrXIII,437491,438789,1,"Putative protein of unknown function; YMR085W and adjacent ORF YMR084W are merged in related strains, and together are paralogous to glutamine-fructose-6-phosphate amidotransferase GFA1"
421,YMR090W,170.1079464,1.164567087,0.130069679,8.935402083,4.06E-19,3.03E-18,S000004696,YMR090W,684,Uncharacterized,chrXIII,449245,449928,1,"Putative protein of unknown function; similar to DTDP-glucose 4,6-dehydratases; GFP-fusion protein localizes to the cytoplasm; up-regulated in response to the fungicide mancozeb; not essential for viability"
422,YMR095C,361.1888015,1.959744594,0.235897062,8.308056355,9.73E-17,6.34E-16,S000004701,SNO1,675,Verified,chrXIII,457285,457959,-1,"Protein of unconfirmed function; involved in pyridoxine metabolism; expression is induced during stationary phase; forms a putative glutamine amidotransferase complex with Snz1p, with Sno1p serving as the glutaminase"
423,YMR096W,1725.151191,4.668885916,0.318770945,14.63702578,1.63E-48,3.98E-47,S000004702,SNZ1,894,Verified,chrXIII,458408,459301,1,"Subunit of a two-component pyridoxal-5’-phosphate synthase; involved in pyridoxine (vitamin B6) biosynthesis from glyceraldehyde-3-phosphate, ribose-5-phosphate and ammonia liberated from glutamine by glutaminase; forms a complex with Sno1p that functions as an active glutaminase; member of a stationary phase-induced gene family where transcriptional induction occurs during the postdiauxic phase; co-regulated with SNO1; paralog of SNZ2 and SNZ3"
424,YMR102C,1211.846365,2.148113803,0.087563477,24.5140731,1.05E-132,3.11E-130,S000004708,YMR102C,2505,Uncharacterized,chrXIII,469848,472352,-1,"Protein of unknown function; transcription is activated by paralogous transcription factors Yrm1p and Yrr1p along with genes involved in multidrug resistance; mutant shows increased resistance to azoles; not an essential gene; YMR102C has a paralog, DGR2, that arose from the whole genome duplication"
425,YMR103C,111.6536188,1.218066097,0.183489259,6.627050004,3.42E-11,1.50E-10,S000004709,YMR103C,363,Uncharacterized,chrXIII,472902,473264,-1,Putative protein of unknown function; conserved among S. cerevisiae strains; YMR103C is not an essential gene
426,YMR104C,479.9881007,1.214607534,0.117838804,10.30592938,6.62E-25,6.47E-24,S000004710,YPK2,2034,Verified,chrXIII,473420,475453,-1,Protein kinase similar to S/T protein kinase Ypk1p; functionally redundant with YPK1 at the genetic level; participates in a signaling pathway required for optimal cell wall integrity; involved in the TORC-dependent phosphorylation of ribosomal proteins Rps6a/b (S6); human homolog SGK2 can complement a ypk1 ypk2 double mutant
427,YMR118C,91.00610444,1.033193262,0.18219401,5.651688822,1.59E-08,5.45E-08,S000004724,SHH3,591,Uncharacterized,chrXIII,502144,502734,-1,"Putative mitochondrial inner membrane protein of unknown function; although similar to paralogous Sdh3p, Shh3p is not a stoichiometric subunit of either succinate dehydrogenase or of the TIM22 translocase; SHH3 has a paralog, SDH3, that arose from the whole genome duplication"
428,YMR122C,46.87498024,1.115096195,0.211702587,5.220050516,1.79E-07,5.53E-07,S000004729,YMR122C,375,Uncharacterized,chrXIII,510701,511075,-1,Putative protein of unknown function; conserved among S. cerevisiae strains; YMR122C is not an essential gene
429,YMR135C,335.9270073,1.100268052,0.110661282,9.937910173,2.85E-23,2.60E-22,S000004742,GID8,1368,Verified,chrXIII,538689,540056,-1,"Subunit of GID Complex, binds strongly to central component Vid30p; GID Complex is involved in proteasome-dependent catabolite inactivation of fructose-1,6-bisphosphatase; recruits Rmd5p, Fyv10 and Vid28p to GID Complex; contains LisH, CTLH, and CRA domains that mediate binding to Vid30p (LisH) and Rmd5p and Vid28p (CTLH and CRA); dosage-dependent regulator of START"
430,YMR151W,20.86267391,1.099362817,0.300556971,3.60813117,0.000308411,0.000663889,S000004759,YIM2,438,Dubious,chrXIII,562506,562943,1,"Dubious open reading frame; unlikely to encode a functional protein, based on available experimental and comparative sequence data; not conserved in closely related Saccharomyces species; 5% of ORF overlaps the verified gene IMP1"
431,YMR159C,20.68716576,1.376630726,0.318657326,4.229557702,2.34E-05,5.77E-05,S000004769,ATG16,453,Verified,chrXIII,574476,574928,-1,"Conserved protein involved in autophagy; interacts with Atg12p-Atg5p conjugates to form Atg12p-Atg5p-Atg16p multimers, which binds to membranes and localizes to the pre-autophagosomal structure and are required for autophagy; relocalizes from nucleus to cytoplasmic foci upon DNA replication stress"
432,YMR169C,191.1770035,1.3479108,0.171305501,7.854294676,4.02E-15,2.38E-14,S000004779,ALD3,1521,Verified,chrXIII,599352,600872,-1,Cytoplasmic aldehyde dehydrogenase; involved in beta-alanine synthesis; uses NAD+ as the preferred coenzyme; very similar to Ald2p; expression is induced by stress and repressed by glucose
433,YMR174C,60.44196917,1.628260508,0.215410435,7.466789811,8.22E-14,4.43E-13,S000004786,PAI3,207,Verified,chrXIII,610159,610365,-1,"Cytoplasmic proteinase A (Pep4p) inhibitor; dependent on Pbs2p and Hog1p protein kinases for osmotic induction; intrinsically unstructured, N-terminal half becomes ordered in the active site of proteinase A upon contact"
434,YMR175W,13.53167989,1.433006599,0.399145159,3.47650868,0.000507988,0.001058647,S000004787,SIP18,240,Verified,chrXIII,611016,611255,1,"Phospholipid-binding hydrophilin; essential to overcome desiccation-rehydration process; expression is induced by osmotic stress; SIP18 has a paralog, GRE1, that arose from the whole genome duplication"
435,YMR194C-A,45.53091197,2.08107961,0.255806619,7.978622591,1.48E-15,9.01E-15,S000007250,YMR194C-A,225,Dubious,chrXIII,652912,653136,-1,"Dubious open reading frame; unlikely to encode a functional protein, based on available experimental and comparative sequence data"
436,YMR195W,673.0172248,2.986430414,0.151206592,19.71119254,1.73E-86,1.32E-84,S000004808,ICY1,384,Verified,chrXIII,654034,654417,1,"Protein of unknown function; required for viability in rich media of cells lacking mitochondrial DNA; mutants have an invasive growth defect with elongated morphology; induced by amino acid starvation; ICY1 has a paralog, ATG41, that arose from the whole genome duplication"
437,YMR206W,52.53988177,1.058997144,0.257112926,4.130993004,3.61E-05,8.70E-05,S000004819,YMR206W,942,Uncharacterized,chrXIII,675896,676837,1,"Putative protein of unknown function; not an essential gene; YMR206W has a paralog, YNR014W, that arose from the whole genome duplication"
438,YMR250W,1073.530418,1.630814274,0.109896985,14.83482436,8.72E-50,2.19E-48,S000004862,GAD1,1758,Verified,chrXIII,770801,772558,1,Glutamate decarboxylase; converts glutamate into gamma-aminobutyric acid (GABA) during glutamate catabolism; involved in response to oxidative stress
439,YMR251W,173.5024977,1.244844198,0.246641305,5.062881086,4.13E-07,1.23E-06,S000004863,GTO3,1101,Verified,chrXIII,772915,774015,1,Omega class glutathione transferase; putative cytosolic localization
440,YMR254C,16.84230689,1.36222984,0.353805234,3.759860487,0.000170008,0.000379062,S000004867,YMR254C,309,Uncharacterized,chrXIII,777615,777923,-1,Putative protein of unknown function; conserved across S. cerevisiae strains
441,YMR262W,230.6122832,1.159420701,0.124491108,9.299376875,1.41E-20,1.13E-19,S000004875,YMR262W,942,Uncharacterized,chrXIII,793726,794667,1,Protein of unknown function; interacts weakly with Knr4p; YMR262W is not an essential gene
442,YMR271C,256.5457228,2.497374346,0.216747264,11.46812739,1.91E-30,2.44E-29,S000004884,URA10,684,Verified,chrXIII,806865,807548,-1,"Minor orotate phosphoribosyltransferase (OPRTase) isozyme; catalyzes the fifth enzymatic step in the de novo biosynthesis of pyrimidines, converting orotate into orotidine-5'-phosphate; URA10 has a paralog, URA5, that arose from the whole genome duplication"
443,YMR291W,804.373395,1.366483775,0.086348898,15.8182018,2.33E-56,7.18E-55,S000004905,TDA1,1761,Verified,chrXIII,852630,854390,1,Protein kinase of unknown cellular role; green fluorescent protein (GFP)-fusion protein localizes to the cytoplasm and nucleus; null mutant is sensitive to expression of the top1-T722A allele; not an essential gene; relocalizes from nucleus to cytoplasm upon DNA replication stress
444,YMR319C,1114.666865,1.073739591,0.121918789,8.803971785,1.32E-18,9.59E-18,S000004938,FET4,1659,Verified,chrXIII,912880,914538,-1,Low-affinity Fe(II) transporter of the plasma membrane
445,YMR321C,108.4491235,2.340943188,0.294032025,7.664100231,1.80E-14,1.02E-13,S000004940,YMR321C,318,Uncharacterized,chrXIII,917579,917896,-1,"Putative protein of unknown function; proposed to be a palmitoylated membrane protein; YMR321C has a paralog, SAM4, that arose from a single-locus duplication"
446,YNL019C,66.99248249,1.444691677,0.3914619,3.655898602,0.000256283,0.000557702,S000004964,YNL019C,855,Uncharacterized,chrXIV,598376,599230,-1,"Putative protein of unknown function; expression induced during heat stress; YNL019C has a paralog, YNL033W, that arose from a segmental duplication"
447,YNL025C,196.2836658,1.000633957,0.106202789,9.40585863,5.16E-21,4.18E-20,S000004970,SSN8,972,Verified,chrXIV,584320,585291,-1,Cyclin-like component of the RNA polymerase II holoenzyme; involved in phosphorylation of the RNA polymerase II C-terminal domain; forms a kinase-cyclin pair in the RNAPII holoenzyme with Ssn3p; required for both entry into and execution of the meiotic program; involved in glucose repression and telomere maintenance; cyclin homolog 35% identical to human cyclin C
448,YNL036W,381.23865,1.637588802,0.226184987,7.23581312,4.63E-13,2.33E-12,S000004981,NCE103,666,Verified,chrXIV,559814,560479,1,"Carbonic anhydrase; metalloenzyme that catalyzes CO2 hydration to bicarbonate, which is an important metabolic substrate, and protons; not expressed under conditions of high CO2, such as inside a growing colony, but transcription is induced in response to low CO2 levels, such as on the colony surface in ambient air; poorly transcribed under aerobic conditions and at an undetectable level under anaerobic conditions; abundance increases in response to DNA replication stress"
449,YNL040W,530.52332,1.152923259,0.11654398,9.887404449,4.72E-23,4.27E-22,S000004985,YNL040W,1371,Verified,chrXIV,553380,554750,1,Protein of unknown function; has strong similarity to alanyl-tRNA synthases from Eubacteria; null mutant displays decreased translation rate and increased readthrough of premature stop codons; green fluorescent protein (GFP)-fusion protein localizes to the cytoplasm; YNL040W is not an essential gene
450,YNL042W-B,8.111741355,1.651786019,0.456697549,3.360203453,0.000778851,0.001576174,S000028850,YNL042W-B,258,Uncharacterized,chrXIV,547113,547370,1,Putative protein of unknown function
451,YNL086W,87.30563889,1.136762172,0.16838037,6.725845913,1.75E-11,7.89E-11,S000005030,SNN1,309,Verified,chrXIV,466334,466642,1,Subunit of the BLOC-1 complex involved in endosomal maturation; interacts with Msb3p; green fluorescent protein (GFP)-fusion protein localizes to endosomes
452,YNL092W,87.04120334,1.311454881,0.162889954,8.006999581,1.18E-15,7.21E-15,S000005036,YNL092W,1203,Verified,chrXIV,450871,452073,1,S-adenosylmethionine-dependent protein methyltransferase; capable of automethylation; member of the seven beta-strand family; YNL092W is not an essential gene
453,YNL093W,24.78793407,1.86970755,0.344998041,5.194060891,2.06E-07,6.31E-07,S000005037,YPT53,663,Verified,chrXIV,449868,450530,1,"Stress-induced Rab family GTPase; required for vacuolar protein sorting and endocytosis; involved in ionic stress tolerance; similar to Vps21p and Ypt52p; functional homolog of Vps21p; mammalian Rab5 homolog; YPT53 has a paralog, VPS21, that arose from the whole genome duplication"
454,YNL103W-A,180.816066,1.918610042,0.207239931,9.216756815,3.06E-20,2.40E-19,S000028701,YNL103W-A,90,Dubious,chrXIV,426719,426808,1,"Dubious open reading frame; unlikely to encode a functional protein, based on available experimental and comparative sequence data; partially overlaps the verified gene MET4/YNL104C"
455,YNL104C,11266.18366,1.869875032,0.17274856,10.82258874,2.69E-27,3.03E-26,S000005048,LEU4,1860,Verified,chrXIV,424895,426754,-1,"Alpha-isopropylmalate synthase (2-isopropylmalate synthase); the main isozyme responsible for the first step in the leucine biosynthesis pathway; LEU4 has a paralog, LEU9, that arose from the whole genome duplication"
456,YNL117W,61.43700879,1.347745074,0.223344052,5.996253036,2.02E-09,7.56E-09,S000005061,MLS1,1665,Verified,chrXIV,406358,408022,1,"Malate synthase, enzyme of the glyoxylate cycle; involved in utilization of non-fermentable carbon sources; expression is subject to carbon catabolite repression; localizes in peroxisomes during growth on oleic acid, otherwise cytosolic; can accept butyryl-CoA as acyl-CoA donor in addition to traditional substrate acetyl-CoA"
457,YNL125C,759.8206057,1.385998983,0.146246874,9.475387228,2.66E-21,2.18E-20,S000005069,ESBP6,2022,Verified,chrXIV,390146,392167,-1,"Protein with similarity to monocarboxylate permeases; appears not to be involved in transport of monocarboxylates such as lactate, pyruvate or acetate across the plasma membrane"
458,YNL128W,52.14913792,1.067210657,0.228471663,4.652000718,3.29E-06,8.89E-06,S000005072,TEP1,1305,Verified,chrXIV,382359,383663,1,PTEN homolog with no demonstrated inositol lipid phosphatase activity; plays a role in normal sporulation; homolog of human tumor suppressor gene PTEN/MMAC1/TEP1 and fission yeast ptn1
459,YNL129W,305.3549707,1.791133549,0.182771356,9.786317391,1.29E-22,1.15E-21,S000005073,NRK1,723,Verified,chrXIV,381480,382202,1,Nicotinamide riboside kinase; catalyzes the phosphorylation of nicotinamide riboside and nicotinic acid riboside in salvage pathways for NAD+ biosynthesis
460,YNL134C,2078.253473,1.828247476,0.096975957,18.84870923,3.01E-79,1.79E-77,S000005078,YNL134C,1131,Verified,chrXIV,372451,373581,-1,"NADH-dependent aldehyde reductase, involved in detoxification of furfural; expression is up-regulated in the presence of furfural and 5-hydroxymethylfurfural, which are compounds generated during lignocellulosic biomass pre-treatment; green fluorescent protein (GFP)-fusion protein localizes to both the cytoplasm and nucleus; protein abundance increases in response to DNA replication stress"
461,YNL146C-A,17.68938962,1.279104723,0.313713883,3.984315314,6.77E-05,0.000158288,S000028851,YNL146C-A,195,Uncharacterized,chrXIV,351386,351580,-1,Putative protein of unknown function
462,YNL146W,49.79932581,1.136036221,0.238047488,4.752122187,2.01E-06,5.57E-06,S000005090,YNL146W,303,Uncharacterized,chrXIV,351715,352017,1,Putative protein of unknown function; green fluorescent protein (GFP)-fusion protein localizes to the endoplasmic reticulum; YNL146W is not an essential gene
463,YNL200C,501.9640399,1.105831289,0.113269873,9.762031367,1.64E-22,1.45E-21,S000005144,NNR1,741,Verified,chrXIV,263713,264453,-1,"NADHX epimerase; catalyzes isomerization of (R)- and (S)-NADHX; homologous to AIBP in mammals and the N- terminal domain of YjeF in E.coli; enzyme is widespread in eukaryotes, prokaryotes and archaea; the authentic, non-tagged protein is detected in highly purified mitochondria in high-throughput studies"
464,YNL231C,1648.463137,2.121174105,0.081783202,25.92481502,3.50E-148,1.99E-145,S000005175,PDR16,1056,Verified,chrXIV,215987,217042,-1,"Phosphatidylinositol transfer protein (PITP); controlled by the multiple drug resistance regulator Pdr1p; localizes to lipid particles and microsomes; controls levels of various lipids, may regulate lipid synthesis; homologous to Pdr17p; protein abundance increases in response to DNA replication stress"
465,YNL237W,475.8593457,1.617430852,0.156169617,10.35236501,4.08E-25,4.05E-24,S000005181,YTP1,1380,Verified,chrXIV,205188,206567,1,Probable type-III integral membrane protein of unknown function; has regions of similarity to mitochondrial electron transport proteins
466,YNL239W,2913.162456,1.055118976,0.090261888,11.68994693,1.43E-31,1.95E-30,S000005183,LAP3,1365,Verified,chrXIV,200569,201933,1,Cysteine aminopeptidase with homocysteine-thiolactonase activity; protects cells against homocysteine toxicity; has bleomycin hydrolase activity in vitro; transcription is regulated by galactose via Gal4p; orthologous to human BLMH
467,YNL260C,139.8379434,1.221719541,0.16776759,7.265279982,3.72E-13,1.90E-12,S000005204,LTO1,597,Verified,chrXIV,156859,157455,-1,"Substrate-specific adaptor protein involved in apo-Rli1p maturation; subunit of the Yae1-Lto1 complex, recruiting apo-Rli1p to the CIA targeting complex, facilitating the insertion of an Fe/S cluster by the Fe-S biosynthetic machinery; deca-GX3 motif crucial for complex formation; essential for aerobic but not anaerobic growth; homolog of human ORAOV1, which is overexpressed in solid tumors; co-expression of ORAOV1 and YAE1 homolog YAE1D1 restores growth and Rli1p maturation after LTO1 depletion"
468,YNL270C,69.33483608,1.18641019,0.256301368,4.645229954,3.40E-06,9.17E-06,S000005214,ALP1,1722,Verified,chrXIV,135940,137661,-1,"Arginine transporter; expression is normally very low and it is unclear what conditions would induce significant expression; ALP1 has a paralog, CAN1, that arose from the whole genome duplication"
469,YNL274C,257.1362935,1.067051595,0.115041939,9.264492609,1.96E-20,1.56E-19,S000005218,GOR1,1053,Verified,chrXIV,121118,122170,-1,"Glyoxylate reductase; null mutation results in increased biomass after diauxic shift; the authentic, non-tagged protein is detected in highly purified mitochondria in high-throughput studies; protein abundance increases in response to DNA replication stress"
470,YNL279W,200.2404083,1.168798627,0.198379611,5.886154056,3.95E-09,1.44E-08,S000005223,PRM1,1986,Verified,chrXIV,110917,112902,1,Pheromone-regulated multispanning membrane protein; involved in membrane fusion during mating; predicted to have 5 transmembrane segments and a coiled coil domain; localizes to the shmoo tip; regulated by Ste12p
471,YNL284C-A,30.07401468,1.177229062,0.367856173,3.149440383,0.001635835,0.003153635,S000007386,YNL284C-A,1323,,chrXIV,100910,102232,-1,Retrotransposon TYA Gag gene co-transcribed with TYB Pol; translated as TYA or TYA-TYB polyprotein; Gag is a nucleocapsid protein that is the structural constituent of virus-like particles (VLPs); similar to retroviral Gag
472,YNL285W,76.2394366,1.119015717,0.211756133,5.268924231,1.37E-07,4.29E-07,S000005229,YNL285W,372,Dubious,chrXIV,96173,96544,1,"Dubious open reading frame; unlikely to encode a functional protein, based on available experimental and comparative sequence data"
473,YNL311C,565.4984356,1.20696565,0.139280819,8.664600267,4.53E-18,3.16E-17,S000005255,SKP2,2292,Verified,chrXIV,49397,51688,-1,"F-box protein of unknown function; predicted to be part of an SCF ubiquitin protease complex; involved in regulating protein levels of sulfur metabolism enzymes; may interact with ribosomes, based on co-purification experiments"
474,YNL314W,130.098638,1.324878485,0.168914948,7.82106534,5.24E-15,3.07E-14,S000005258,DAL82,768,Verified,chrXIV,44447,45214,1,"Positive regulator of allophanate inducible genes; binds a dodecanucleotide sequence upstream of all genes that are induced by allophanate; contains an UISALL DNA-binding, a transcriptional activation, and a coiled-coil domain"
475,YNR001C,2081.234699,1.155066197,0.074137302,15.57742841,1.04E-54,3.08E-53,S000005284,CIT1,1440,Verified,chrXIV,629622,631061,-1,"Citrate synthase; catalyzes the condensation of acetyl coenzyme A and oxaloacetate to form citrate; the rate-limiting enzyme of the TCA cycle; nuclear encoded mitochondrial protein; CIT1 has a paralog, CIT2, that arose from the whole genome duplication"
476,YNR002C,111.8861099,1.907178458,0.193208031,9.803230728,1.09E-22,9.74E-22,S000005285,ATO2,849,Verified,chrXIV,633008,633856,-1,"Putative transmembrane protein involved in export of ammonia; ammonia is a starvation signal that promotes cell death in aging colonies; phosphorylated in mitochondria; member of the TC 9.B.33 YaaH family; homolog of Y. lipolytica Gpr1p; ATO2 has a paralog, ADY2, that arose from the whole genome duplication"
477,YNR034W-A,107.0908954,1.396092556,0.241865882,5.760535938,8.38E-09,2.96E-08,S000007525,EGO4,297,Verified,chrXIV,692561,692857,1,"Protein of unknown function; expression is regulated by Msn2p/Msn4p; YNR034W-A has a paralog, YCR075W-A, that arose from the whole genome duplication"
478,YNR056C,574.3497141,2.463447998,0.220136297,11.18418948,4.87E-29,5.92E-28,S000005339,BIO5,1686,Verified,chrXIV,731618,733303,-1,"Putative transmembrane protein involved in the biotin biosynthesis; responsible for uptake of 7-keto 8-aminopelargonic acid; BIO5 is in a cluster of 3 genes (BIO3, BIO4, and BIO5) that mediate biotin synthesis"
479,YNR057C,433.8058201,1.025209398,0.205110849,5.046138575,4.51E-07,1.34E-06,S000005340,BIO4,714,Verified,chrXIV,733356,734069,-1,"Dethiobiotin synthetase; catalyzes the third step in the biotin biosynthesis pathway; BIO4 is in a cluster of 3 genes (BIO3, BIO4, and BIO5) that mediate biotin synthesis; BIO3 and BIO4 were acquired by horizontal gene transfer (HGT) from bacteria; expression appears to be repressed at low iron levels"
480,YNR058W,922.7735296,1.517778572,0.228148834,6.706731553,1.99E-11,8.95E-11,S000005341,BIO3,1443,Verified,chrXIV,734291,735733,1,"7,8-diamino-pelargonic acid aminotransferase (DAPA); catalyzes the second step in the biotin biosynthesis pathway; BIO3 is in a cluster of 3 genes (BIO3, BIO4, and BIO5) that mediate biotin synthesis; BIO3 and BIO4 were acquired by horizontal gene transfer (HGT) from bacteria"
481,YNR065C,617.8869385,1.082246454,0.14488721,7.468881817,8.09E-14,4.36E-13,S000005348,YNR065C,3351,Uncharacterized,chrXIV,750350,753700,-1,Protein of unknown function; protein-protein interactions suggest a possible role in actin patch formation; YNR065C is not an essential gene
482,YNR066C,143.587736,1.23757684,0.188982856,6.536483019,6.30E-11,2.70E-10,S000005349,YNR066C,1311,Uncharacterized,chrXIV,753725,755035,-1,Putative membrane-localized protein of unknown function
483,YNR068C,228.8216726,2.349930278,0.177506347,13.17937607,1.15E-39,2.14E-38,S000005351,YNR068C,819,Uncharacterized,chrXIV,760067,760885,-1,"Putative protein of unknown function; exhibits homology to C-terminal end of Bul1p; expressed as a readthrough product of BSC5, the readthrough locus being termed BUL3; the BUL3 readthrough product is involved in ubiquitin-mediated sorting of plasma membrane proteins and interacts with WW domains of Rsp5p in vitro, but in a functionally different way than the non-readthrough form"
484,YNR069C,290.0224252,2.606618725,0.181400162,14.30810331,1.95E-46,4.38E-45,S000005352,BSC5,1470,Verified,chrXIV,761123,762592,-1,Protein of unknown function; shows homology with N-terminal end of Bul1p; ORF exhibits genomic organization compatible with a translational readthrough-dependent mode of expression; readthrough expression includes YNR068C and the locus for this readthrough is termed BUL3; Bul3p is involved in ubiquitin-mediated sorting of plasma membrane proteins; readthrough and shortened forms of Bul3p interact with Rsp5p differently in vitro
485,YNR072W,135.5251974,1.695369841,0.246327039,6.861538546,6.81E-12,3.18E-11,S000005355,HXT17,1695,Verified,chrXIV,772657,774351,1,"Putative transmembrane polyol transporter; supports growth on and uptake of mannitol and sorbitol with moderate affinity when overexpressed in a strain deleted for hexose family members; minor hexose transport activity when overexpressed in a similar strain; induced by raffinose and galactose at pH 7.7 versus pH 4.7, repressed by high levels of glucose; HXT17 has a paralog, HXT13, that arose from a segmental duplication"
486,YOL032W,138.8377683,1.106394527,0.133645943,8.260017579,1.46E-16,9.42E-16,S000005392,OPI10,741,Verified,chrXV,265429,266169,1,Protein with a possible role in phospholipid biosynthesis; null mutant displays an inositol-excreting phenotype that is suppressed by exogenous choline; protein abundance increases in response to DNA replication stress
487,YOL038C-A,19.64330653,1.147161295,0.287901383,3.912638094,9.13E-05,0.000210926,S000028812,YOL038C-A,96,Uncharacterized,chrXV,254926,255021,-1,Putative protein of unknown function; identified by SAGE analysis
488,YOL052C-A,619.4348766,1.7065355,0.156541752,10.89559244,1.21E-27,1.39E-26,S000005413,DDR2,186,Verified,chrXV,231570,231755,-1,"Multi-stress response protein; expression is activated by a variety of xenobiotic agents and environmental or physiological stresses; DDR2 has a paralog, HOR7, that arose from the whole genome duplication"
489,YOL058W,9338.384389,5.119248388,0.175765185,29.10467494,3.13E-186,2.80E-183,S000005419,ARG1,1263,Verified,chrXV,219211,220473,1,Arginosuccinate synthetase; catalyzes the formation of L-argininosuccinate from citrulline and L-aspartate in the arginine biosynthesis pathway; potential Cdc28p substrate
490,YOL064C,1342.286851,1.803791104,0.116057635,15.53682245,1.95E-54,5.74E-53,S000005425,MET22,1074,Verified,chrXV,206103,207176,-1,"Bisphosphate-3'-nucleotidase; involved in salt tolerance and methionine biogenesis; dephosphorylates 3'-phosphoadenosine-5'-phosphate and 3'-phosphoadenosine-5'-phosphosulfate, intermediates of the sulfate assimilation pathway; human homolog BPNT1 complements yeast null mutant"
491,YOL071W,180.9976385,1.034321967,0.124469137,8.297896999,1.06E-16,6.89E-16,S000005432,SDH5,489,Verified,chrXV,196507,196995,1,"Protein required for flavinylation of Sdh1p; binds to Sdh1p and promotes FAD cofactor attachment, which is necessary for succinate dehydrogenase (SDH) complex assembly and activity; mutations in human ortholog PGL2 are associated with neuroendocrine tumors (paraganglioma)"
492,YOL082W,497.6306801,1.26868603,0.109645141,11.56411786,6.26E-31,8.23E-30,S000005442,ATG19,1248,Verified,chrXV,168727,169974,1,Receptor protein for the cytoplasm-to-vacuole targeting (Cvt) pathway; delivers cargo proteins aminopeptidase I (Ape1p) and alpha-mannosidase (Ams1p) to the phagophore assembly site for packaging into Cvt vesicles; interaction with Atg19p during the Cvt pathway requires phosphorylation by Hrr25p
493,YOL083W,163.5802006,1.564934008,0.141496861,11.02096579,3.03E-28,3.55E-27,S000005443,ATG34,1239,Verified,chrXV,165714,166952,1,Receptor protein involved in selective autophagy during starvation; specifically involved in the transport of cargo protein alpha-mannosidase (Ams1p); Atg19p paralog
494,YOL085C,12.29762486,1.196050788,0.378357811,3.075730458,0.002099876,0.003979516,S000005445,YOL085C,342,Uncharacterized,chrXV,161673,162014,-1,Putative protein of unknown function; conserved among S. cerevisiae strains; YOL085C is not an essential gene; partially overlaps dubious ORF YOL085W-A
495,YOL085W-A,12.44505044,1.765743481,0.3763761,4.416352659,1.00E-05,2.57E-05,S000028708,YOL085W-A,213,Dubious,chrXV,161579,161791,1,"Dubious open reading frame; unlikely to encode a functional protein, based on available experimental and comparative sequence data; partially overlaps the dubious ORF YOL085C"
496,YOL091W,197.9812721,2.672070381,0.345836376,7.706502814,1.29E-14,7.37E-14,S000005451,SPO21,1830,Verified,chrXV,145334,147163,1,"Component of the meiotic outer plaque of the spindle pole body; involved in modifying the meiotic outer plaque that is required prior to prospore membrane formation; SPO21 has a paralog, YSW1, that arose from the whole genome duplication"
497,YOL117W,198.7505754,1.595381126,0.127996603,12.42652153,1.88E-35,2.89E-34,S000005477,RRI2,1938,Verified,chrXV,97551,99488,1,Subunit of the COP9 signalosome (CSN) complex; this complex cleaves the ubiquitin-like protein Nedd8 from SCF ubiquitin ligases; plays a role in the mating pheromone response
498,YOL118C,169.6621696,3.167462769,0.338999851,9.242217022,2.41E-20,1.91E-19,S000005478,YOL118C,309,Uncharacterized,chrXV,96608,96916,-1,Putative protein of unknown function; conserved across S. cerevisiae strains
499,YOL119C,1383.717987,2.491711902,0.209397963,11.89321892,1.28E-32,1.82E-31,S000005479,MCH4,1506,Verified,chrXV,94856,96361,-1,Protein with similarity to mammalian monocarboxylate permeases; monocarboxylate permeases are involved in transport of monocarboxylic acids across the plasma membrane but mutant is not deficient in monocarboxylate transport
500,YOL140W,833.539272,1.882891612,0.192934143,9.759344554,1.68E-22,1.48E-21,S000005500,ARG8,1272,Verified,chrXV,58759,60030,1,Acetylornithine aminotransferase; catalyzes the fourth step in the biosynthesis of the arginine precursor ornithine
501,YOL150C,59.63906791,3.614557888,0.284143118,11.77430868,5.29E-32,7.31E-31,S000005510,YOL150C,312,Dubious,chrXV,44473,44784,-1,"Dubious open reading frame; unlikely to encode a functional protein, based on available experimental and comparative sequence data"
502,YOL151W,3046.795364,3.877004483,0.109861684,35.25042381,3.38E-272,1.06E-268,S000005511,GRE2,1029,Verified,chrXV,43694,44722,1,"3-methylbutanal reductase and NADPH-dependent methylglyoxal reductase; stress induced (osmotic, ionic, oxidative, heat shock and heavy metals); regulated by the HOG pathway; restores resistance to glycolaldehyde by coupling reduction of glycolaldehyde to ethylene glycol and oxidation of NADPH to NADP+; protein abundance increases in response to DNA replication stress; methylglyoxal reductase (NADPH-dependent) is also known as D-lactaldehyde dehydrogenase"
503,YOL152W,227.6121257,1.2041598,0.164475648,7.307672021,2.72E-13,1.40E-12,S000005512,FRE7,1863,Verified,chrXV,40748,42610,1,Putative ferric reductase with similarity to Fre2p; expression induced by low copper levels
504,YOL156W,146.7059771,1.351257278,0.14753616,9.13270154,6.68E-20,5.16E-19,S000005516,HXT11,1704,Verified,chrXV,25273,26976,1,"Hexose transporter; capable of transporting a broad range of substrates including: glucose, fructose, mannose and galactose; polyol transporter that supports the growth on and uptake of xylitol with low affinity when overexpressed in a strain deleted for hexose family members; nearly identical in sequence to Hxt9p; has similarity to major facilitator superfamily (MFS) transporters; involved in pleiotropic drug resistance"
505,YOL158C,3357.899716,1.569467176,0.172322932,9.109654232,8.26E-20,6.34E-19,S000005518,ENB1,1821,Verified,chrXV,19491,21311,-1,Ferric enterobactin transmembrane transporter; expressed under conditions of iron deprivation; member of the major facilitator superfamily; expression is regulated by Rcs1p and affected by chloroquine treatment
506,YOL159C-A,54.45764833,1.360019038,0.219603622,6.143527086,8.07E-10,3.16E-09,S000007627,YOL159C-A,273,Verified,chrXV,15233,15505,-1,Protein of unknown function; overexpression affects endocytic protein trafficking; identified by sequence comparison with hemiascomycetous yeast species
507,YOL162W,24.99708436,1.15090109,0.313612477,3.644379949,0.000268037,0.000581057,S000005522,YOL162W,648,Uncharacterized,chrXV,10119,10766,1,"Putative protein of unknown function; proposed to be an inactive evolutionary remnant that along with neighboring gene YOL163W may have constituted a second sulfonate transporter and SOA1 paralog that is intact in S. uvarum, S. eubayanus and S. arboricola and named SOA2; member of the Dal5p subfamily of the major facilitator family"
508,YOL163W,45.80776132,1.261925688,0.233921915,5.352239903,8.69E-08,2.76E-07,S000005523,YOL163W,510,Uncharacterized,chrXV,9597,10106,1,"Putative protein of unknown function; proposed to be an inactive evolutionary remnant that along with neighboring gene YOL162W may have constituted a second sulfonate transporter and SOA1 paralog that is intact in S. uvarum, S. eubayanus and S. arboricola and named SOA2; member of the Dal5p subfamily of the major facilitator family"
509,YOL164W,365.0460051,1.093458576,0.147938307,7.38806965,1.49E-13,7.83E-13,S000005524,BDS1,1941,Verified,chrXV,6175,8115,1,Bacterially-derived sulfatase; required for use of alkyl- and aryl-sulfates as sulfur sources
510,YOL164W-A,21.65426096,1.365344804,0.312883493,4.28068701,1.86E-05,4.64E-05,S000028580,YOL164W-A,183,Uncharacterized,chrXV,4130,4312,1,Putative protein of unknown function; identified by fungal homology and RT-PCR
511,YOR010C,79.27892621,1.029184613,0.231682479,4.436941758,9.12E-06,2.35E-05,S000005536,TIR2,756,Verified,chrXV,346195,346950,-1,"Putative cell wall mannoprotein; member of the Srp1p/Tip1p family of serine-alanine-rich proteins; transcription is induced by cold shock and anaerobiosis; TIR2 has a paralog, TIR3, that arose from the whole genome duplication"
512,YOR011W-A,7.427619307,1.531212791,0.467168368,3.048332365,0.002301153,0.00433207,S000028581,YOR011W-A,207,Uncharacterized,chrXV,355652,355858,1,Putative protein of unknown function
513,YOR020W-A,221.4164527,1.326169395,0.127135414,10.41409653,2.14E-25,2.16E-24,S000028526,MCO10,273,Uncharacterized,chrXV,371685,371957,1,"Putative protein of unknown function; conserved in A. gossypii; the authentic, non-tagged protein is detected in highly purified mitochondria in high-throughput studies"
514,YOR040W,192.6228796,1.055372186,0.122596928,8.599168144,8.03E-18,5.49E-17,S000005566,GLO4,858,Verified,chrXV,407064,407921,1,"Mitochondrial glyoxalase II; catalyzes the hydrolysis of S-D-lactoylglutathione into glutathione and D-lactate; GLO4 has a paralog, GLO2, that arose from the whole genome duplication"
515,YOR044W,193.3691415,1.470132537,0.170513017,8.606870034,7.51E-18,5.18E-17,S000005570,IRC23,474,Verified,chrXV,413007,413480,1,"Protein of unknown function; green fluorescent protein (GFP)-fusion localizes to the ER; null mutant displays increased levels of spontaneous Rad52p foci; IRC23 has a paralog, BSC2, that arose from the whole genome duplication"
516,YOR049C,1292.612649,3.564891847,0.095226227,37.31031823,1.12E-304,6.98E-301,S000005575,RSB1,1065,Verified,chrXV,422668,423732,-1,Putative sphingoid long-chain base (LCB) efflux transporter; integral membrane transporter that localizes to the plasma membrane and may transport long chain bases (LCBs) from the cytoplasmic side toward the extracytoplasmic side of the membrane; role in glycerophospholipid translocation; suppressor of the sphingoid LCB sensitivity of an LCB-lyase mutation
517,YOR071C,1106.705542,1.138321694,0.117830682,9.659655528,4.47E-22,3.86E-21,S000005597,NRT1,1797,Verified,chrXV,459480,461276,-1,High-affinity nicotinamide riboside transporter; also transports thiamine with low affinity; major transporter for 5-aminoimidazole-4-carboxamide-1-beta-D-ribofuranoside (acadesine) uptake; shares sequence similarity with Thi7p and Thi72p; proposed to be involved in 5-fluorocytosine sensitivity
518,YOR100C,117.9121388,3.035737071,0.293290373,10.14201518,3.60E-24,3.42E-23,S000005626,CRC1,984,Verified,chrXV,513295,514278,-1,Mitochondrial inner membrane carnitine transporter; required for carnitine-dependent transport of acetyl-CoA from peroxisomes to mitochondria during fatty acid beta-oxidation; human homolog SLC25A20 complements yeast null mutant
519,YOR120W,489.1419818,3.151180941,0.156281257,20.08467408,1.00E-89,8.61E-88,S000005646,GCY1,939,Verified,chrXV,551114,552052,1,"Glycerol dehydrogenase; involved in an alternative pathway for glycerol catabolism used under microaerobic conditions; also has mRNA binding activity; member of the aldo-keto reductase (AKR) family; human homolog AKR1B1 can complement yeast null mutant; protein abundance increases in response to DNA replication stress; GCY1 has a paralog, YPR1, that arose from the whole genome duplication"
520,YOR130C,593.3330956,3.23262437,0.199393667,16.16527175,8.86E-59,3.05E-57,S000005656,ORT1,879,Verified,chrXV,569929,570807,-1,"Ornithine transporter of the mitochondrial inner membrane; exports ornithine from mitochondria as part of arginine biosynthesis; functionally complemented by human ortholog, SLC25A15, which is associated with hyperammonaemia-hyperornithinaemia-homocitrullinuria (HHH) syndrome, but HHH-associated variants fail to complement"
521,YOR134W,76.26456691,1.277949889,0.220279382,5.782150763,7.38E-09,2.61E-08,S000005660,BAG7,1230,Verified,chrXV,578564,579793,1,"Rho GTPase activating protein (RhoGAP); stimulates the intrinsic GTPase activity of Rho1p, which plays a bud growth by regulating actin cytoskeleton organization and cell wall biosynthesis, resulting in the downregulation of Rho1p; structurally and functionally related to Sac7p; BAG7 has a paralog, SAC7, that arose from the whole genome duplication"
522,YOR137C,437.2569535,1.15639658,0.114994996,10.05119824,9.08E-24,8.44E-23,S000005663,SIA1,1869,Verified,chrXV,581813,583681,-1,Protein of unassigned function; involved in activation of the Pma1p plasma membrane H+-ATPase by glucose; contains peptide signal for membrane localization
523,YOR152C,438.2766701,2.039233547,0.139124372,14.63257812,1.74E-48,4.23E-47,S000005678,ATG40,771,Verified,chrXV,617518,618288,-1,"Autophagy receptor with a role in endoplasmic reticulum degradation; involved specifically in autophagy of cortical and cytoplasmic ER in response to nitrogen starvation or rapamycin treatment; localizes to the cortical and cytoplasmic ER; similar to human FAM134B, which is also involved in ER autophagy and is associated with sensory neuropathy"
524,YOR153W,56049.48498,1.971370459,0.090422668,21.80070806,2.28E-105,3.57E-103,S000005679,PDR5,4536,Verified,chrXV,619840,624375,1,"Plasma membrane ATP-binding cassette (ABC) transporter; multidrug transporter actively regulated by Pdr1p; also involved in steroid transport, cation resistance, and cellular detoxification during exponential growth; PDR5 has a paralog, PDR15, that arose from the whole genome duplication"
525,YOR173W,274.1293013,1.721388293,0.143646028,11.95640904,6.01E-33,8.58E-32,S000005699,DCS2,1062,Verified,chrXV,657264,658325,1,"m(7)GpppX pyrophosphatase regulator; non-essential, stress induced regulatory protein; modulates m7G-oligoribonucleotide metabolism; inhibits Dcs1p; regulated by Msn2p, Msn4p, and the Ras-cAMP-cAPK signaling pathway; mutant has increased aneuploidy tolerance; DCS2 has a paralog, DCS1, that arose from the whole genome duplication"
526,YOR179C,87.39811254,1.084815345,0.233089062,4.642525189,3.44E-06,9.29E-06,S000005705,SYC1,567,Verified,chrXV,671845,672411,-1,"Subunit of the APT subcomplex of cleavage and polyadenylation factor; may have a role in 3' end formation of both polyadenylated and non-polyadenylated RNAs; SYC1 has a paralog, YSH1, that arose from the whole genome duplication"
527,YOR184W,2820.636112,1.274670308,0.078667756,16.20195359,4.89E-59,1.70E-57,S000005710,SER1,1188,Verified,chrXV,679357,680544,1,"3-phosphoserine aminotransferase; catalyzes the formation of phosphoserine from 3-phosphohydroxypyruvate, required for serine and glycine biosynthesis; regulated by the general control of amino acid biosynthesis mediated by Gcn4p; protein abundance increases in response to DNA replication stress"
528,YOR186W,17.8109102,1.367701947,0.379427491,3.500444679,0.000464483,0.00097252,S000005712,YOR186W,435,Uncharacterized,chrXV,683111,683545,1,"Putative protein of unknown function; proper regulation of expression during heat stress is sphingolipid-dependent; mCherry fusion protein localizes to the vacuole; YOR186W has a paralog, YLR297W, that arose from the whole genome duplication"
529,YOR192C,234.8487233,1.515153622,0.208652047,7.255376965,4.01E-13,2.03E-12,S000005718,THI72,1800,Verified,chrXV,698768,700567,-1,Transporter of thiamine or related compound; contributes to uptake of 5-aminoimidazole-4-carboxamide-1-beta-D-ribofuranoside (acadesine); shares sequence similarity with Thi7p
530,YOR192C-C,141.7239348,1.107429808,0.148049875,7.466587803,8.23E-14,4.43E-13,S000028857,YOR192C-C,237,Uncharacterized,chrXV,703988,704224,-1,Putative protein of unknown function; identified by expression profiling and mass spectrometry
531,YOR200W,32.43475191,1.288322826,0.276592345,4.609416832,4.04E-06,1.08E-05,S000005726,YOR200W,399,Dubious,chrXV,720417,720815,1,"Dubious open reading frame; unlikely to encode a functional protein, based on available experimental and comparative sequence data; partially overlaps the verified ORF MRM1/YOR201c"
532,YOR203W,302.9670193,3.134676812,0.221880587,14.04181425,8.65E-45,1.88E-43,S000005729,YOR203W,354,Dubious,chrXV,722565,722918,1,"Dubious open reading frame; unlikely to encode a functional protein, based on available experimental and comparative sequence data; overlaps 5' end of essential DED1 gene required for translation initiation"
533,YOR222W,1126.095985,1.89391128,0.119235936,15.87762215,9.05E-57,2.82E-55,S000005748,ODC2,924,Verified,chrXV,758330,759253,1,"Mitochondrial inner membrane transporter; 2-oxodicarboxylate transporter, exports 2-oxoadipate and 2-oxoglutarate from the mitochondrial matrix to the cytosol for use in lysine and glutamate biosynthesis and in lysine catabolism; ODC2 has a paralog, ODC1, that arose from the whole genome duplication"
534,YOR273C,1615.756135,2.764012485,0.136491372,20.23347124,4.97E-91,4.37E-89,S000005799,TPO4,1980,Verified,chrXV,834452,836431,-1,"Polyamine transporter of the major facilitator superfamily; member of the 12-spanner drug:H(+) antiporter DHA1 family; recognizes spermine, putrescine, and spermidine; localizes to the plasma membrane"
535,YOR289W,199.7891407,1.577366202,0.138462205,11.36040099,6.58E-30,8.28E-29,S000005815,YOR289W,756,Uncharacterized,chrXV,853357,854112,1,Putative protein of unknown function; transcription induced by the unfolded protein response; green fluorescent protein (GFP)-fusion protein localizes to both the cytoplasm and the nucleus
536,YOR302W,386.2476799,2.544459929,0.234820575,10.80854109,3.14E-27,3.51E-26,S000005828,YOR302W,78,Verified,chrXV,882765,882842,1,"CPA1 uORF; Arginine attenuator peptide, regulates translation of the CPA1 mRNA"
537,YOR303W,5186.357287,2.549661595,0.170615806,14.94435949,1.70E-50,4.36E-49,S000005829,CPA1,1236,Verified,chrXV,882899,884134,1,"Small subunit of carbamoyl phosphate synthetase; carbamoyl phosphate synthetase catalyzes a step in the synthesis of citrulline, an arginine precursor; translationally regulated by an attenuator peptide encoded by YOR302W within the CPA1 mRNA 5'-leader"
538,YOR314W,9.211105078,1.658421525,0.402471828,3.862267718,0.000112339,0.000256237,S000005841,YOR314W,330,Uncharacterized,chrXV,903043,903372,1,Putative protein of unknown function; conserved across S. cerevisiae strains
539,YOR316C,1634.771999,1.455724331,0.124906028,11.65499008,2.16E-31,2.90E-30,S000005843,COT1,1320,Verified,chrXV,906236,907555,-1,"Vacuolar transporter that mediates zinc transport into the vacuole; overexpression confers resistance to cobalt and rhodium; protein abundance increases in response to DNA replication stress; COT1 has a paralog, ZRC1, that arose from the whole genome duplication"
540,YOR317W,2652.633168,1.164040038,0.07595824,15.32343003,5.33E-53,1.48E-51,S000005844,FAA1,2103,Verified,chrXV,909343,911445,1,"Long chain fatty acyl-CoA synthetase; activates fatty acids with a preference for C12:0-C16:0 chain lengths; role in the competitive import of long-chain fatty acids and sphingoid long-chain bases; accounts for most acyl-CoA synthetase activity; localizes to lipid particles and the plasma membrane; role in sphingolipid-to-glycerolipid metabolism; forms ER foci upon replication stress; faa1 faa4 double null complemented by any of human ACSBG1, ACSL1, 3, 4, 5, 6, SLC27A2, or 4"
541,YOR327C,643.6822449,1.22533412,0.125976616,9.723192696,2.40E-22,2.09E-21,S000005854,SNC2,348,Verified,chrXV,930734,931081,-1,"Vesicle membrane receptor protein (v-SNARE); involved in the fusion between Golgi-derived secretory vesicles with the plasma membrane; Snc2p levels regulated by Vps45p; member of the synaptobrevin/VAMP family of R-type v-SNARE proteins; SNC2 has a paralog, SNC1, that arose from the whole genome duplication"
542,YOR328W,1995.112511,2.758909157,0.179538537,15.35921666,3.07E-53,8.73E-52,S000005855,PDR10,4695,Verified,chrXV,931803,936497,1,ATP-binding cassette (ABC) transporter; multidrug transporter involved in the pleiotropic drug resistance network; regulated by Pdr1p and Pdr3p
543,YOR339C,61.34506054,1.151011709,0.268876974,4.283257633,1.84E-05,4.59E-05,S000005866,UBC11,471,Verified,chrXV,958362,958832,-1,"Ubiquitin-conjugating enzyme; most similar in sequence to Xenopus ubiquitin-conjugating enzyme E2-C, but not a true functional homolog of this E2; unlike E2-C, not required for the degradation of mitotic cyclin Clb2"
544,YOR343C,38.06383783,1.726441181,0.276164921,6.101914655,1.05E-09,4.06E-09,S000005870,YOR343C,327,Uncharacterized,chrXV,968148,968474,-1,Putative protein of unknown function; conserved across S. cerevisiae strains
545,YOR347C,820.4158655,1.977926532,0.09976597,19.80903934,2.49E-87,1.97E-85,S000005874,PYK2,1521,Verified,chrXV,984942,986462,-1,"Pyruvate kinase; appears to be modulated by phosphorylation; transcription repressed by glucose, and Pyk2p may be active under low glycolytic flux; PYK2 has a paralog, CDC19, that arose from the whole genome duplication"
546,YOR365C,73.80312253,1.008015769,0.195977799,5.122637858,3.01E-07,9.10E-07,S000005892,YOR365C,2112,Uncharacterized,chrXV,1023461,1025572,-1,"Putative protein of unknown function; not an essential protein; YOR365C has a paralog, FLC2, that arose from the whole genome duplication"
547,YOR376W,4.972673858,1.670544892,0.479572398,3.096361812,0.001959112,0.003734258,S000005903,YOR376W,369,Uncharacterized,chrXV,1043191,1043559,1,Putative protein of unknown function; conserved among S. cerevisiae strains; YOR376W is not an essential gene
548,YOR376W-A,43.3673686,1.17527134,0.226851493,5.139517434,2.75E-07,8.36E-07,S000028586,YOR376W-A,156,Uncharacterized,chrXV,1045196,1045351,1,Putative protein of unknown function; identified by fungal homology and RT-PCR
549,YOR381W,495.4471858,1.505111564,0.171370272,8.783405965,1.59E-18,1.14E-17,S000005908,FRE3,2136,Verified,chrXV,1055545,1057680,1,Ferric reductase; reduces siderophore-bound iron prior to uptake by transporters; expression induced by low iron levels
550,YOR382W,3724.871386,2.011617942,0.388802118,5.25193235,1.51E-07,4.68E-07,S000005909,FIT2,462,Verified,chrXV,1059531,1059992,1,Mannoprotein that is incorporated into the cell wall; incorporated via a glycosylphosphatidylinositol (GPI) anchor; involved in the retention of siderophore-iron in the cell wall 
551,YOR386W,233.0450787,1.70177465,0.130696478,12.98688101,1.45E-38,2.55E-37,S000005913,PHR1,1698,Verified,chrXV,1066839,1068536,1,DNA photolyase involved in photoreactivation; repairs pyrimidine dimers in the presence of visible light; induced by DNA damage; regulated by transcriptional repressor Rph1p
552,YOR393W,55.3578892,1.827763193,0.28670735,6.296502691,3.04E-10,1.22E-09,S000005920,ERR1,1314,Verified,chrXV,1080276,1081589,1,Putative phosphopyruvate hydratase
553,YPL033C,95.96365095,3.82497678,0.459805005,7.918513015,2.40E-15,1.44E-14,S000005954,SRL4,846,Verified,chrXVI,487362,488207,-1,Protein of unknown function; involved in regulation of dNTP production; null mutant suppresses the lethality of lcd1 and rad53 mutations; expression is induced by Kar4p
554,YPL036W,485.1821968,1.494875243,0.352348987,4.250905023,2.13E-05,5.27E-05,S000005957,PMA2,2844,Verified,chrXVI,482843,485686,1,"Plasma membrane H+-ATPase; isoform of Pma1p, involved in pumping protons out of the cell; regulator of cytoplasmic pH and plasma membrane potential"
555,YPL060W,100.7390282,1.121290867,0.170591655,6.557586498,5.47E-11,2.36E-10,S000005981,MFM1,1242,Verified,chrXVI,434523,435764,1,Mitochondrial inner membrane magnesium transporter; involved in maintenance of mitochondrial magnesium concentrations and membrane potential; indirectly affects splicing of group II introns; functionally and structurally related to Mrs2p
556,YPL066W,733.9142172,1.183573701,0.096147796,12.30525914,8.49E-35,1.30E-33,S000005987,RGL1,1440,Verified,chrXVI,426233,427672,1,"Regulator of Rho1p signaling, cofactor of Tus1p; required for the localization of Tus1p during all phases of cytokinesis; green fluorescent protein (GFP)-fusion protein localizes to the bud neck and cytoplasm; null mutant is viable and exhibits growth defect on a non-fermentable (respiratory) carbon source"
557,YPL077C,53.19435992,1.242909434,0.198884819,6.200334172,5.63E-10,2.22E-09,S000005998,YPL077C,723,Uncharacterized,chrXVI,409368,410090,-1,"Putative protein of unknown function; regulates PIS1 expression; mutant displays spore wall assembly defect in ether sensitivity screen; YPL077C is not an essential gene; YPL077C has a paralog, YBR197C, that arose from the whole genome duplication"
558,YPL088W,458.2487457,3.342053998,0.216354376,15.33991077,4.14E-53,1.16E-51,S000006009,YPL088W,1029,Uncharacterized,chrXVI,381965,382993,1,Putative aryl alcohol dehydrogenase; transcription is activated by paralogous transcription factors Yrm1p and Yrr1p along with genes involved in multidrug resistance
559,YPL092W,1791.668992,2.737096967,0.207909481,13.15906163,1.51E-39,2.78E-38,S000006013,SSU1,1377,Verified,chrXVI,373793,375169,1,Plasma membrane sulfite pump involved in sulfite metabolism; required for efficient sulfite efflux; major facilitator superfamily protein
560,YPL095C,684.4575585,1.87077798,0.191687477,9.753022001,1.79E-22,1.57E-21,S000006016,EEB1,1371,Verified,chrXVI,368071,369441,-1,"Acyl-coenzymeA:ethanol O-acyltransferase; responsible for the major part of medium-chain fatty acid ethyl ester biosynthesis during fermentation; possesses short-chain esterase activity; may be involved in lipid metabolism and detoxification; EEB1 has a paralog, EHT1, that arose from the whole genome duplication"
561,YPL123C,223.5782312,1.517340913,0.118191343,12.80667599,1.50E-37,2.54E-36,S000006044,RNY1,1305,Verified,chrXVI,317641,318945,-1,Vacuolar RNase of the T(2) family; relocalizes to the cytosol where it cleaves tRNAs upon oxidative or stationary phase stress; required for tRNA-specific translational pausing suring oxidative stress; promotes apoptosis under stress conditions and this function is independent of Rny1p catalytic activity
562,YPL135W,1448.065318,1.121231713,0.125800396,8.911636365,5.03E-19,3.75E-18,S000006056,ISU1,498,Verified,chrXVI,297553,298050,1,"Conserved protein of the mitochondrial matrix; performs a scaffolding function during assembly of iron-sulfur clusters, interacts physically and functionally with yeast frataxin (Yfh1p); ISU1 has a paralog, ISU2, that arose from the whole genome duplication; isu1 isu2 double mutant is inviable; human homolog ISCU implicated in mitochondrial myopathy, can complement isu1 isu2 double mutant"
563,YPL165C,143.7977847,1.722417371,0.137400625,12.47470693,1.03E-35,1.62E-34,S000006086,SET6,1122,Verified,chrXVI,237956,239077,-1,"SET domain protein of unknown function; deletion heterozygote is sensitive to compounds that target ergosterol biosynthesis, may be involved in compound availability"
564,YPL166W,76.51108093,2.002158409,0.208583238,9.504248382,2.01E-21,1.67E-20,S000006087,ATG29,642,Verified,chrXVI,237338,237979,1,Autophagy-specific protein; required for recruiting other ATG proteins to the pre-autophagosomal structure (PAS); interacts with Atg17p and localizas to the PAS in a manner interdependent with Atg17p and Cis1p; not conserved; relocalizes from nucleus to cytoplasmic foci upon DNA replication stress
565,YPL186C,52.31193264,1.859786623,0.232598898,7.847375635,4.25E-15,2.51E-14,S000006107,UIP4,915,Verified,chrXVI,194512,195426,-1,Protein that interacts with Ulp1p; a Ubl (ubiquitin-like protein)-specific protease for Smt3p protein conjugates; detected in a phosphorylated state in the mitochondrial outer membrane; also detected in ER and nuclear envelope
566,YPL188W,606.7788344,1.064213736,0.152829343,6.962185395,3.35E-12,1.60E-11,S000006109,POS5,1245,Verified,chrXVI,191406,192650,1,Mitochondrial NADH kinase; phosphorylates NADH; also phosphorylates NAD(+) with lower specificity; required for the response to oxidative stress
567,YPL191C,139.866343,1.323080602,0.132334622,9.965164856,2.17E-23,1.98E-22,S000006112,YPL191C,1083,Verified,chrXVI,183597,184679,-1,"K48-specific deubiquitinating (DUB) enzyme; MINDY family endo-type deubiquitinase that preferentially cleaves long K48-linked polyubiquitin chains between moieties; diploid deletion strain exhibits high budding index; GFP-fusion protein localizes to the cytoplasm endoplasmic reticulum and cell periphery in high-throughput studies; YPL191C has a paralog, YGL082W, that arose from the whole genome duplication; ortholog of human MINDY2/FAM63B"
568,YPL196W,190.4843497,1.007509225,0.123656712,8.134603384,4.13E-16,2.60E-15,S000006117,OXR1,822,Verified,chrXVI,175043,175864,1,Protein of unknown function required for oxidative damage resistance; required for normal levels of resistance to oxidative damage; null mutants are sensitive to hydrogen peroxide; member of a conserved family of proteins found in eukaryotes
569,YPL223C,73.62379155,1.369795469,0.222844747,6.121423622,9.27E-10,3.61E-09,S000006144,GRE1,507,Verified,chrXVI,128632,129138,-1,"Hydrophilin essential in desiccation-rehydration process; stress induced (osmotic, ionic, oxidative, heat shock and heavy metals); regulated by the HOG pathway; GRE1 has a paralog, SIP18, that arose from the whole genome duplication"
570,YPL230W,161.0900873,1.473250039,0.141827803,10.35302374,4.05E-25,4.02E-24,S000006151,USV1,1176,Verified,chrXVI,115312,116487,1,"Putative transcription factor containing a C2H2 zinc finger; mutation affects transcriptional regulation of genes involved in growth on non-fermentable carbon sources, response to salt stress and cell wall biosynthesis; USV1 has a paralog, RGM1, that arose from the whole genome duplication"
571,YPL247C,460.6907186,1.370352012,0.115622925,11.84430235,2.30E-32,3.23E-31,S000006168,YPL247C,1572,Uncharacterized,chrXVI,82625,84196,-1,Putative protein of unknown function; green fluorescent protein (GFP)-fusion protein localizes to the cytoplasm and nucleus; similar to the petunia WD repeat protein an11; overexpression causes a cell cycle delay or arrest
572,YPL250C,1426.093299,3.81890708,0.252170581,15.11911602,1.21E-51,3.21E-50,S000006171,ATG41,411,Verified,chrXVI,74309,74719,-1,"Protein of unknown function; required for selective and nonselective autophagy, and mitophagy; regulates the rate of autophagosome formation; interacts with Atg9p, and has a similar peri-mitochondrial localization; elevated Gcn4p-dependent expression under autophagy-inducing conditions; mobilized into polysomes upon a shift from a fermentable to nonfermentable carbon source; potential Cdc28p substrate; ATG41 has a paralog, ICY1, that arose from the whole genome duplication"
573,YPL257W,82.6188302,1.222737343,0.206439901,5.904552922,3.54E-09,1.30E-08,S000006178,YPL257W,582,Uncharacterized,chrXVI,63279,63860,1,Putative protein of unknown function; homozygous diploid deletion strain exhibits low budding index; physically interacts with Hsp82p; YPL257W is not an essential gene
574,YPL264C,435.8880799,2.861776669,0.26822881,10.64226876,1.89E-26,2.05E-25,S000006185,YPL264C,1062,Uncharacterized,chrXVI,43283,44344,-1,Putative membrane protein of unknown function; physically interacts with Hsp82p; YPL264C is not an essential gene
575,YPL273W,2618.793569,1.063732206,0.080880124,13.15109584,1.68E-39,3.08E-38,S000006194,SAM4,978,Verified,chrXVI,25087,26064,1,"S-adenosylmethionine-homocysteine methyltransferase; functions along with Mht1p in the conversion of S-adenosylmethionine (AdoMet) to methionine to control the methionine/AdoMet ratio; SAM4 has a paralog, YMR321C, that arose from a single-locus duplication"
576,YPR001W,191.8459901,1.690880249,0.22624547,7.454478354,9.02E-14,4.84E-13,S000006205,CIT3,1461,Verified,chrXVI,556377,557837,1,Dual specificity mitochondrial citrate and methylcitrate synthase; catalyzes the condensation of acetyl-CoA and oxaloacetate to form citrate and that of propionyl-CoA and oxaloacetate to form 2-methylcitrate
577,YPR002W,198.1139688,1.886345604,0.178918129,10.48791637,9.82E-26,1.02E-24,S000006206,PDH1,1551,Verified,chrXVI,558385,559935,1,"Putative 2-methylcitrate dehydratase; mitochondrial protein that participates in respiration; induced by diauxic shift; homologous to E. coli PrpD, may take part in the conversion of 2-methylcitrate to 2-methylisocitrate"
578,YPR007C,27.24555684,1.052479419,0.320451678,3.275979329,0.001052963,0.002087892,S000006211,REC8,2043,Verified,chrXVI,569336,571378,-1,"Meiosis-specific component of the sister chromatid cohesion complex; alpha-kleisin family member that maintains cohesion between homologous chromosomes during meiosis I until chromosome arm-associated Rec8p is cleaved by Esp1p; cohesion between sister chromatid centromeres is maintained until metaphase of meiosis II when it is cleaved by Esp1; independent of the role in cohesion, Rec8p promotes allelic collisions and prevents nonspecific chromosome interactions; homolog of S. pombe Rec8p"
579,YPR015C,54.33097674,1.316493127,0.21535367,6.063660067,1.33E-09,5.11E-09,S000006219,YPR015C,744,Uncharacterized,chrXVI,590283,591026,-1,Putative zinc finger transcription factor; binds DNA in sequence-specific manner; overexpression causes a cell cycle delay or arrest
580,YPR036W-A,5020.088008,2.140493127,0.177126699,12.07500848,1.43E-33,2.11E-32,S000028425,SPO24,204,Verified,chrXVI,645950,646153,1,"Small (67 amino acids) protein involved in sporulation; localizes to the prospore membrane; phosphorylated during meiosis; a longer, 5'-extended mRNA is also transcribed beginning in mid-meiosis, regulated by two MSEs (middle sporulation elements), and includes an uORF of 15 codons in its 5'-UTR; evidence transcription is regulated by Pdr1p"
581,YPR054W,242.345265,1.009219628,0.174520998,5.778383917,7.54E-09,2.67E-08,S000006258,SMK1,1167,Verified,chrXVI,666280,667446,1,Middle sporulation-specific mitogen-activated protein kinase (MAPK); required for production of the outer spore wall layers; negatively regulates activity of the glucan synthase subunit Gsc2p
582,YPR058W,1152.948517,1.771547383,0.145154848,12.20194994,3.03E-34,4.59E-33,S000006262,YMC1,924,Verified,chrXVI,673751,674674,1,"Secondary mitochondrial inner membrane glycine transporter; required with HEM25 for the transport of glycine into mitochondria for the initiation of heme biosynthesis; proposed role in oleate metabolism and glutamate biosynthesis; member of the mitochondrial carrier (MCF) family; localizes to the vacuole in response to H2O2; YMC1 has a paralog, YMC2, that arose from the whole genome duplication"
583,YPR059C,80.0707907,1.727897785,0.268024244,6.409647568,1.46E-10,6.02E-10,S000006263,YPR059C,387,Dubious,chrXVI,674314,674700,-1,"Dubious open reading frame; unlikely to encode a functional protein, based on available experimental and comparative sequence data; partially overlaps the verified gene YMC1/YPR058W"
584,YPR078C,71.32221665,1.310795901,0.290270298,4.529545999,5.91E-06,1.56E-05,S000006282,YPR078C,1119,Uncharacterized,chrXVI,697147,698265,-1,Putative protein of unknown function; possible role in DNA metabolism and/or in genome stability; expression is heat-inducible
585,YPR093C,118.0861059,1.087320326,0.148329589,7.313598615,2.60E-13,1.34E-12,S000006297,ASR1,867,Verified,chrXVI,719558,720424,-1,Ubiquitin ligase that modifies and regulates RNA Pol II; involved in a putative alcohol-responsive signaling pathway; accumulates in the nucleus under alcohol stress; has a role in organization of septins and the actin cytoskeleton; contains a Ring/PHD finger domain similar to the mammalian rA9 protein
586,YPR111W,280.0619544,1.04030164,0.162947327,6.381489849,1.75E-10,7.18E-10,S000006315,DBF20,1695,Verified,chrXVI,747306,749000,1,"Ser/Thr kinase involved in late nuclear division; one of the mitotic exit network (MEN) proteins; necessary for the execution of cytokinesis; also plays a role in regulating the stability of SWI5 and CLB2 mRNAs; DBF20 has a paralog, DBF2, that arose from the whole genome duplication"
587,YPR145W,9353.522568,1.806050167,0.066213485,27.27477487,8.45E-164,5.87E-161,S000006349,ASN1,1719,Verified,chrXVI,822620,824338,1,"Asparagine synthetase; catalyzes the synthesis of L-asparagine from L-aspartate in the asparagine biosynthetic pathway; ASN1 has a paralog, ASN2, that arose from the whole genome duplication"
588,YPR167C,180.1589131,1.815552423,0.179537053,10.07778061,6.93E-24,6.49E-23,S000006371,MET16,786,Verified,chrXVI,876847,877632,-1,"3'-phosphoadenylsulfate reductase; reduces 3'-phosphoadenylyl sulfate to adenosine-3',5'-bisphosphate and free sulfite using reduced thioredoxin as cosubstrate, involved in sulfate assimilation and methionine metabolism"
589,YPR185W,504.8007217,1.021050883,0.146633894,6.961992876,3.35E-12,1.60E-11,S000006389,ATG13,2217,Verified,chrXVI,907218,909434,1,Regulatory subunit of the Atg1p signaling complex; stimulates Atg1p kinase activity; required for vesicle formation during autophagy and the cytoplasm-to-vacuole targeting (Cvt) pathway; contains a HORMA domain required for autophagy and for recruitment of the phosphatidylinositol 3-kinase complex subunit Atg14p to the pre-autophagosomal structure
590,YPR192W,55.67050116,1.090918001,0.226229216,4.796957782,1.61E-06,4.52E-06,S000006396,AQY1,918,Verified,chrXVI,921860,922777,1,"Spore-specific water channel; mediates the transport of water across cell membranes, developmentally controlled; may play a role in spore maturation, probably by allowing water outflow, may be involved in freeze tolerance"
591,YPR194C,432.7143454,1.159629668,0.133650547,8.678815074,4.00E-18,2.80E-17,S000006398,OPT2,2634,Verified,chrXVI,924304,926937,-1,"Oligopeptide transporter; localized to peroxisomes and affects glutathione redox homeostasis; also localizes to the plasma membrane (PM) and to the late Golgi, and has a role in maintenance of lipid asymmetry between the inner and outer leaflets of the PM; member of the OPT family, with potential orthologs in S. pombe and C. albicans; also plays a role in formation of mature vacuoles and in polarized cell growth"
592,YPR201W,85.6578873,1.006764054,0.166241478,6.037296487,1.57E-09,5.96E-09,S000006405,ARR3,1215,Verified,chrXVI,939922,941136,1,Plasma membrane metalloid/H+ antiporter; member of bile/arsenite/riboflavin transporter (BART) superfamily; transports arsenite and antimonite; required for resistance to arsenic compounds; transcription is activated by Arr1p in the presence of arsenite
